# Supplementary material for: Efficacy of Jump Training on Lower Limb Power in Older Adults: A Systematic Review
Source: Research Square preprint supplement (doi:10.21203/rs.3.rs-8554709/v1), 2026-01-22
Supplement: Supplementary file 1 [file d2e949fe90f23fb346021736.docx]

Search Strategies for Bibliographic Databases .

This document presents the adapted and updated search strategies for the bibliographic databases **Embase**, **Web of Science**, and **Scopus**, based on the original strategy provided for **MEDLINE (PubMed)** and incorporating the PICO acronym terms: "Population: elderly", "Intervention: jump training", "Outcome: Power", and "Study Type: Randomized Clinical Trial". The objective is to optimize the retrieval of relevant articles on plyometric exercises in the elderly across each platform, considering their specific indexing and syntax features.

Original Search Strategy for MEDLINE (PubMed)

The strategy provided for MEDLINE (PubMed) serves as the basis for adaptation, using MeSH (Medical Subject Headings) terms and free-text keywords in the title and abstract fields ([tiab]), in addition to publication types ([pt]).

**Population:**

("Aged"[Mesh] OR "Aged, 80 and over"[Mesh] OR "Frail Elderly"[Mesh]) OR ("older adult*"[tiab] OR "elderly"[tiab] OR "senior*"[tiab] OR "geriatric*"[tiab] OR "aging"[tiab] OR "ageing"[tiab])

**Intervention:**

("Plyometric Exercise"[Mesh] OR "Exercise Therapy"[Mesh] OR "Resistance Training"[Mesh]) OR ("plyometric*"[tiab] OR "jump* training"[tiab] OR "explosive training"[tiab] OR "power training"[tiab] OR "stretch-shortening cycle"[tiab] OR "ballistic training"[tiab] OR "reactive strength"[tiab])

**Study Type:**

(randomized controlled trial[pt] OR controlled clinical trial[pt] OR randomized[tiab] OR placebo[tiab] OR drug therapy[sh] OR randomly[tiab] OR trial[tiab] OR groups[tiab] NOT (animals [mh] NOT humans [mh]))

**Outcome:**

("muscle power"[tiab] OR "muscle strength"[tiab])

Search Strategy for Embase

For Embase, the strategy was adapted using **Emtree** terms (with the /exp suffix to explode the term and include more specific terms in the hierarchy) and free-text keywords (with the :ab,ti suffix to search in the title and abstract). Single quotes (' ') were used to search for exact phrases in Embase.

**Population:**

('aged'/exp OR 'aged, 80 and over'/exp OR 'frail elderly'/exp OR 'older adult*':ab,ti OR 'elderly':ab,ti OR 'senior*':ab,ti OR 'geriatric*':ab,ti OR 'aging':ab,ti OR 'ageing':ab,ti)

**Intervention:**

('plyometric exercise'/exp OR 'exercise therapy'/exp OR 'resistance training'/exp OR 'plyometric*':ab,ti OR 'jump* training':ab,ti OR 'explosive training':ab,ti OR 'power training':ab,ti OR 'stretch-shortening cycle':ab,ti OR 'ballistic training':ab,ti OR 'reactive strength':ab,ti)

**Study Type:**

('randomized controlled trial'/exp OR 'controlled clinical trial'/exp OR 'clinical trial'/exp OR 'crossover procedure'/exp OR 'prospective study'/exp OR 'follow up'/exp OR 'placebo'/exp OR 'single blind procedure'/exp OR 'double blind procedure'/exp OR 'randomization'/exp OR 'randomized':ab,ti OR 'randomised':ab,ti OR 'controlled trial':ab,ti OR 'RCT':ab,ti OR 'clinical trial':ab,ti)

**Outcome:**

('muscle power':ab,ti OR 'muscle strength':ab,ti)

**Combined Strategy:**

(Population) AND (Intervention) AND (Study Type) AND (Outcome)

**Observations:**

- The asterisk (*) operator is used for **truncation** (to find variations of a word).
- Single quotes (' ') are used to search for **exact phrases** in Embase.
- The suffix /exp (**explode**) is used for Emtree terms to include all more specific terms in the hierarchy.
- The suffix :ab,ti is used to search for keywords in the **title and abstract**. Embase also allows :ti for title and :ab for abstract. If no field is specified, the search is performed in the default fields (usually title, abstract, keywords, and Emtree terms).
- For MeSH terms that are mapped to Emtree, Embase generally recognizes them. The use of /exp ensures the comprehensiveness of the search for controlled terms.
- The syntax [embase]/lim is not necessary when building the strategy, as it is a filter that would be applied in the database interface after the search is executed.

Search Strategy for Web of Science

In Web of Science, MeSH terms and keywords are treated as **free-text terms**. The field code TS= (**Topic**) is used to search in the Title, Abstract, Author Keywords, and Keywords Plus fields. Double quotes (" ") are used for exact phrases and the asterisk (*) for truncation.

**Population:**

( TS=("Aged") OR TS=("Aged, 80 and over") OR TS=("Frail Elderly") OR TS=("older adult*") OR TS=("elderly") OR TS=("senior*") OR TS=("geriatric*") OR TS=("aging") OR TS=("ageing"))

**Intervention:**

(TS=("Plyometric Exercise") OR TS=("Exercise Therapy") OR TS=("Resistance Training") OR TS=("plyometric*") OR TS=("jump* training") OR TS=("explosive training") OR TS=("power training") OR TS=("stretch-shortening cycle") OR TS=("ballistic training") OR TS=("reactive strength"))

**Study Type:**

( TS=("randomized controlled trial") OR TS=("controlled clinical trial") OR TS=("randomized") OR TS=("placebo") OR TS=("drug therapy") OR TS=("randomly") OR TS=("trial") OR TS=("groups") OR TS=("crossover procedure") OR TS=("prospective study") OR TS=("follow up") OR TS=("clinical trial") OR TS=("single blind procedure") OR TS=("double blind procedure") OR TS=("randomization"))

**Outcome:**

( TS=("muscle power") OR TS=("muscle strength"))

**Combined Strategy:**

(Population) AND (Intervention) AND (Study Type) AND (Outcome)

**Observations:**

- The asterisk (*) operator is used for **truncation**.
- Double quotes (" ") are used to search for **exact phrases**.
- TS= is the field code for **Topic**, which searches the title, abstract, author keywords, and Keywords Plus.
- Web of Science does not have a controlled vocabulary like MeSH or Emtree to be "exploded". MeSH terms are treated as free-text keywords.
- The exclusion NOT (animals [mh] NOT humans [mh]) from the MEDLINE strategy does not have a direct equivalent in the basic Web of Science search syntax and is generally applied as a **post-search filter** or through specific species fields, if available and relevant for advanced searching.
- For the term "drug therapy", which is a MeSH subheading ([sh]), it was included as a free-text term TS=("drug therapy") in Web of Science, as there is no direct mapping for subheadings as in PubMed.

Search Strategy for Scopus

For Scopus, the strategy was updated to include the new terms for "Study Type" and "Outcome". The strategy uses INDEXTERMS() for index terms (including MeSH) and TITLE-ABS-KEY() to search in the Title, Abstract, and Keywords fields. Double quotes (" ") are used for exact phrases within TITLE-ABS-KEY() and the asterisk (*) for truncation.

**Population:**

(INDEXTERMS("Aged") OR INDEXTERMS("Aged, 80 and over") OR INDEXTERMS("Frail Elderly") OR TITLE-ABS-KEY("older adult*") OR TITLE-ABS-KEY("elderly") OR TITLE-ABS-KEY("senior*") OR TITLE-ABS-KEY("geriatric*") OR TITLE-ABS-KEY("aging") OR TITLE-ABS-KEY("ageing"))

**Intervention:**

(INDEXTERMS("Plyometric Exercise") OR INDEXTERMS("Exercise Therapy") OR INDEXTERMS("Resistance Training") OR TITLE-ABS-KEY("plyometric*") OR TITLE-ABS-KEY("jump* training") OR TITLE-ABS-KEY("explosive training") OR TITLE-ABS-KEY("power training") OR TITLE-ABS-KEY("stretch-shortening cycle") OR TITLE-ABS-KEY("ballistic training") OR TITLE-ABS-KEY("reactive strength"))

**Study Type:**

(INDEXTERMS("Randomized Controlled Trial") OR INDEXTERMS("Controlled Clinical Trial") OR TITLE-ABS-KEY("randomized") OR TITLE-ABS-KEY("placebo") OR TITLE-ABS-KEY("drug therapy") OR TITLE-ABS-KEY("randomly") OR TITLE-ABS-KEY("trial") OR TITLE-ABS-KEY("groups") OR INDEXTERMS("Crossover Procedure") OR INDEXTERMS("Prospective Study") OR INDEXTERMS("Follow Up") OR INDEXTERMS("Clinical Trial") OR INDEXTERMS("Single Blind Procedure") OR INDEXTERMS("Double Blind Procedure") OR INDEXTERMS("Randomization"))

**Outcome:**

( TITLE-ABS-KEY("muscle power") OR TITLE-ABS-KEY("muscle strength"))

**Combined Strategy (Example):**

(Population) AND (Intervention) AND (Study Type) AND (Outcome)

**Observations:**

- The asterisk (*) operator is used for **truncation**.
- Double quotes (" ") are used to search for **exact phrases** within TITLE-ABS-KEY().
- INDEXTERMS() is the field code to search for **index terms** (including MeSH).
- TITLE-ABS-KEY() searches the Title, Abstract, and Keywords fields.
- The exclusion NOT (animals [mh] NOT humans [mh]) from the MEDLINE strategy does not have a direct equivalent in the basic Scopus search syntax and is generally applied as a **post-search filter** or through specific species fields, if available and relevant for advanced searching.
- For terms like "drug therapy", which is a MeSH subheading ([sh]), it was included as TITLE-ABS-KEY("drug therapy") or INDEXTERMS("Drug Therapy") depending on its nature as an index term or free-text keyword.

References

- Embase Search Tips - Expert Searching. (n.d.). Johns Hopkins Medicine. Retrieved from <https://browse.welch.jhmi.edu/searching/embase-search-tips>
- Web of Science: Search Techniques at a glance. (n.d.). Dublin City University Library. Retrieved from <https://dcu.libguides.com/c.php?g=701483&p=5040857>
- Searching Scopus - Scopus LibGuide. (n.d.). Elsevier. Retrieved from <https://elsevier.libguides.com/Scopus/topical-search>
- A Comparison of Emtree® and MeSH®. (2015). Elsevier. Retrieved from <https://supportcontent.elsevier.com/Support%20Hub/Embase/Files%20&%20Attachements/4685-Embase_White%20Paper_Comparison%20of%20Emtree%20and%20MeSH_July%202015.pdf>
