# Supplementary material for: Efficacy of Jump Training on Lower Limb Power in Older Adults: A Systematic Review
Source: Research Square preprint supplement (doi:10.21203/rs.3.rs-8554709/v1), 2026-01-22
Supplement: Supplementary file 2 [file eb4eb0fe6d5b5de39a7e1941.xlsx]

## Sheet: 1_Resumo total
REVISÃO SISTEMÁTICA - RESUMO CONSOLIDADO
ETAPA	DESCRIÇÃO	N	OBSERVAÇÕES
1. Identificação	Registros identificados nas bases	4681	EMBASE: 214, PUBMED: 1215, SCOPUS: 2856, COCHRANE: 278, WOS: 91
2. Triagem Duplicado	Registros duplicados removidos	624	Processo realizado por I.A
3. Triagem	Registros únicos	4057	Processo realizado por I.A
	Excluídos por triagem de título	3876	Não relacionados a saltos/pliométrico( I.A)
4. Elegibilidade	Avaliados por título e resumo	181	Processo realizado Manualmente + (I.A)
	Exclusão após leitura do título e resumo	127	Acronímo PICO- pesquisador principal
5. Exclusão total	Exclusão em todas as etapas	4627	Processo realizado Manualmente e por IA
6. Inclusão Final	Estudos incluídos parcialmente	54	Leitura integral
7. Inclusão Final	Estudos incluídos na revisão sistemática	09	Após a leitura integral

## Sheet: 2_Duplicados
ID	Título	Ano	DOI	PMID	Fontes	N° de Duplicatas
b95819f2d102...	Effects of exercise intensity on nutritional status, body composition, and energy balance in patients with COPD: a randomized controlled trial	2025	10.1186/s12890-024-03448-1	39856592	SCOPUS, EMBASE	2
fc2efb85477e...	Clinical outcomes of asynchronous telerehabilitation through a mobile app are equivalent to synchronous telerehabilitation in patients with fibromyalgia: a randomized control study	2025	10.1186/s12891-025-08377-6	39905353	SCOPUS, EMBASE	2
f74836a5c001...	Efficacy of structured exercise and oat supplementation for treating non-alcoholic fatty liver disease: protocol of a randomized controlled trial	2025	10.1186/s12937-025-01128-2	40287684	SCOPUS, EMBASE	2
8c34870760a3...	Effectiveness of prior intra-articular corticosteroid injection in elderly patients with knee osteoarthritis undergoing progressive resistance training: a randomized controlled trial	2025	10.1186/s42358-025-00452-9	40296068	SCOPUS, EMBASE	2
2613aa60c85a...	Comparative effectiveness of different dual task mode interventions on cognitive function in older adults with mild cognitive impairment or dementia: a systematic review and network meta-analysis	2025	10.1007/s40520-025-03016-5	40304821	SCOPUS, EMBASE	2
78f2e0540ec7...	Examining how resistance training affects bone strength in older adults with rheumatic diseases: a systematic review	2025	10.1186/s41927-025-00531-w		SCOPUS, EMBASE	2
d7fc9b5ab324...	Effect of low-intensity resistance training at different levels of blood flow restriction on pain, proprioception and muscle strength in patients with knee osteoarthritis: a randomized controlled trial	2025	10.1186/s12891-025-09051-7	40781308	SCOPUS, EMBASE	2
b82cde67d719...	Effects of milk fat globule membrane ingestion with exercise on physical strength in healthy young adults: a randomized double-blind, placebo-controlled trial	2025	10.1080/15502783.2025.2535372	40684312	SCOPUS, EMBASE	2
d5ad851014d5...	Enhancing Muscle Quality: Exploring Leucine and Whey Protein in Sarcopenic Individuals	2025	10.1002/jcsm.70060	40937507	SCOPUS, EMBASE	2
831912dc5d28...	Safety of strength training with blood flow restriction in patients with hemophilic arthropathy; a randomized pilot study	2025	10.1080/09593985.2025.2497964	40277333	SCOPUS, EMBASE	2
09d33f81da57...	Intensity-dependent transcranial direct current stimulation effects on lower limb strength: optimizing acute and prolonged gains in explosive force and maximal strength	2025	10.1016/j.neuroscience.2025.08.002	40774619	SCOPUS, EMBASE	2
eecd0969bf3a...	Expiratory Muscle Strength Training to Improve Voice and Respiratory Outcomes After Laryngectomy: A Feasibility Study	2025	10.1111/1460-6984.70107	40817430	SCOPUS, EMBASE	2
590eb3411078...	Effects of vitamins C and e supplementation combined with 12-week resistance training in older women with sarcopenia: A randomized, double-blind, placebo-controlled trial	2025	10.1097/MD.0000000000043976	40859523	SCOPUS, EMBASE	2
8f3468bfbf30...	Efficacy of progressive resistance training intensities and adequate dietary protein intake for community-dwelling frail older adults (TEAMS study), protocol for a randomised controlled trial	2025	10.1186/s12877-025-06209-9	40783689	SCOPUS, EMBASE	2
ced686ec8094...	Vitamin D and Sarcopenia: Implications for Muscle Health	2025	10.3390/biomedicines13081863		SCOPUS, EMBASE	2
ab1e9b53e166...	Effect of Pelvic Floor Muscle Training Combined with Electrical Stimulation Therapy on Stress Urinary Incontinence: A Meta-Analysis	2025	10.1159/000543133	39778553	SCOPUS, EMBASE	2
f198727c86cc...	Effects of Kinesio taping and extracorporeal shock wave therapy in combination with exercise in sarcopenic older adults: a study protocol of a double-blinded, randomized controlled trial	2025	10.1186/s12877-025-06251-7	40739188	SCOPUS, EMBASE	2
aef6bc159e43...	Effectiveness of an mHealth-based impact exercise program for bone health in postmenopausal women: a randomised controlled trial protocol	2025	10.1186/s12889-025-22576-9	40640761	SCOPUS, EMBASE	2
f3b1909b62e7...	Impact of prior arthroscopic rotator cuff repair on postoperative outcomes of reverse shoulder arthroplasty: a comparative analysis of muscle strength recovery and clinical results	2025	10.1016/j.jseint.2025.04.021		SCOPUS, EMBASE	2
a26b7e65979f...	The effects of low-load resistance training combined with blood flow restriction on knee rehabilitation in middle-aged and elderly patients: A systematic review and meta-analysis	2025	10.1371/journal.pone.0323388	40455786	SCOPUS, EMBASE	2
5be96c72e8ef...	Feasibility and effectiveness of physical exercise for older adults delivered remotely via videoconferencing-systematic review and meta analysis	2025	10.1093/ageing/afaf171	40552370	SCOPUS, EMBASE	2
b5160c53a95e...	Is Exercise During Androgen Deprivation Therapy Effective and Safe? A Randomized Controlled Trial	2025	10.1111/sms.70084	40481694	SCOPUS, EMBASE	2
29f5ac87c7c1...	The effect of muscles in the treatment of lower limb lymphedema: respiratory muscles or leg muscles?	2025	10.1007/s00520-025-09436-3	40214771	SCOPUS, EMBASE	2
ea707b26eacb...	Effects of resistance training vs high intensity interval training on body composition, muscle strength, cardiorespiratory fitness, and quality of life in survivors of breast cancer: a randomized trial	2025	10.1007/s10549-024-07559-5	39557768	SCOPUS, EMBASE	2
16962098d490...	Quercetin ingestion alters motor unit behavior and enhances improvement in muscle strength following resistance training in older adults: a randomized, double-blind, controlled trial	2025	10.1007/s00394-025-03634-9	40063125	SCOPUS, EMBASE	2
6ea5e890b618...	Nutritional intake as a determinant of high-speed resistance and multicomponent training efficacy on strength in older women at risk of sarcopenia. A randomized clinical trial	2025	10.1016/j.clnu.2025.02.015	39999641	SCOPUS, EMBASE	2
f61cfbca1c23...	Feasibility and effects of remotely supervised aerobic training and resistance training in older adults with mild cognitive impairment: A pilot three-arm randomised controlled trial	2025	10.1136/gpsych-2024-101858		SCOPUS, EMBASE	2
9b0511572852...	Preventive effects of progressive resistance training of different intensities on breast cancer–related lymphedema	2025	10.1007/s00520-025-09256-5	39953154	SCOPUS, EMBASE	2
254e42bf0d38...	Comparison of the Effectiveness of Protein Supplementation Combined with Resistance Training on Body Composition and Physical Function in Healthy Elderly Adults	2025	10.1016/j.tjnut.2025.01.017	39889852	SCOPUS, EMBASE	2
9a0a6ae8fe4b...	Effects of 12-week whole-body vibration training versus resistance training in older people with sarcopenia	2025	10.1038/s41598-025-91644-2	40011687	SCOPUS, EMBASE	2
f5a2e5a0a998...	Impact of resistance training and chicken intake on vascular and muscle health in elderly women	2025	10.1002/jcsm.13572	39569460	SCOPUS, EMBASE	2
0e7474be0955...	Effects of a Hypocaloric Diet Plus Resistance Training with and Without Amino Acids in Older Participants with Dynapenic Obesity: A Randomized Clinical Trial	2025	10.3390/nu17030418	39940276	SCOPUS, EMBASE	2
6061515b0d1c...	Hämatrain-Hybrid movement therapy during inpatient and outpatient hematological treatment: correlations with physical and psychological parameters	2025	10.1007/s00520-025-09148-8	39805997	SCOPUS, EMBASE	2
897ba7f76c45...	Effects of preoperative beta-hydroxy-beta-methylbutyrate, arginine, and glutamine supplementation on cardiac surgery: A randomized controlled trial	2025	10.1016/j.clnu.2024.12.030	39765161	SCOPUS, EMBASE	2
fb14f8437b5e...	A meta-analysis of randomized controlled trials: evaluating the efficacy of isokinetic muscle strengthening training in improving knee osteoarthritis outcomes	2025	10.1186/s13018-025-05495-8	39856723	SCOPUS, EMBASE	2
ed8ebdc7dd05...	Chang Gung Memorial Hospital At Linkou	2025			EMBASE	2
631dd056c114...	Arthroscopic partial meniscectomy versus exercise therapy for degenerative meniscal tears: 10-year follow-up of the OMEX randomised controlled trial	2025	10.1136/bjsports-2024-108644	39326908	SCOPUS, EMBASE	2
dd88f68391b9...	Effect of Combined Exercise and Nutrition Interventions During Inpatient Chemotherapy in Acute Leukemia and Malignant Lymphoma Patients: A Randomized Controlled Trial	2025	10.1080/01635581.2024.2406043	39300733	SCOPUS, EMBASE	2
9bba4c904bc4...	Size and site matter: the influence of corpus callosum subregional lesions on the magnitude of cross-education of strength	2025	10.3389/fphys.2025.1554742		SCOPUS, EMBASE	2
2a80ac09d24c...	Effectiveness of non-pharmacological therapies for preventing frailty in older people: An umbrella review	2025	10.1016/j.archger.2024.105628	39303421	SCOPUS, EMBASE	2
b4184ef2675f...	The impact of different pulmonary rehabilitation approaches on fibrotic interstitial lung disease: a comparative randomized trial	2025	10.1080/17476348.2025.2513512	40440705	SCOPUS, EMBASE	2
e2a88eefe936...	Feasibility and preliminary efficacy of an online home-based functional exercise program for Parkinson's disease: a pilot study	2025	10.3389/fneur.2025.1591330		SCOPUS, EMBASE	2
35647e098df9...	Optimal dose of resistance training to improve handgrip strength in older adults with sarcopenia: a systematic review and Bayesian model-based network meta-analysis	2025	10.3389/fphys.2025.1564988		SCOPUS, EMBASE	2
dfa71812c1ea...	Effect of power training on function and body composition in older women with probable sarcopenia. A study protocol for a randomized controlled trial	2025	10.1371/journal.pone.0313072	39761305	SCOPUS, EMBASE	2
9522694b8501...	Dynamic Muscle Power Training with Elastic Bands Improve Lower Extremity Function and Balance in Older Chronic Stroke Survivors?	2025	10.1097/TGR.0000000000000443		SCOPUS, EMBASE	2
ed349338cafc...	Effect of hypoxia conditioning on physical fitness in middle-aged and older adults—a systematic review and meta-analysis	2025	10.7717/peerj.19348		SCOPUS, EMBASE	2
9e9978e9998b...	Effectiveness of high-frequency repetitive transcranial magnetic stimulation combined with quadriceps strength training in the treatment of knee osteoarthritis: a randomized controlled trial	2025	10.1177/1759720X251370979		SCOPUS, EMBASE	2
58500264855d...	Effect of high voltage electrical stimulation in temporomandibular disorders: a randomized controlled trial	2025	10.1080/09593985.2024.2321215	38407175	SCOPUS, EMBASE	2
8c916b1c7d22...	Effects of Resistance Training Volume on Physical Function, Lean Body Mass and Lower-Body Muscle Hypertrophy and Strength in Older Adults: A Systematic Review and Network Meta-analysis of 151 Randomised Trials	2025	10.1007/s40279-024-02123-z	39405023	SCOPUS, EMBASE	2
70b80fc4286d...	A 24-Week Combined Resistance and Balance Training Program Improves Physical Function in Older Adults: A Randomized Controlled Trial	2025	10.1519/JSC.0000000000004941	39652737	SCOPUS, EMBASE	2
c154a06cb07f...	The impact of core training combined with breathing exercises on individuals with chronic non-specific low back pain	2025	10.3389/fpubh.2025.1518612	40061473	SCOPUS, EMBASE	2
2c7c1b291254...	Short-term resistance training enhances functional and physiological markers in older women: implications for biomechanical and health interventions in aging	2025	10.3389/fpubh.2025.1630525	40791617	SCOPUS, EMBASE	2
8af779954ef1...	Exercises and Brain Stimulation to Preserve Function in Amyotrophic Lateral Sclerosis A Systematic Review and Meta-Analysis	2024	10.1212/CPJ.0000000000200408		SCOPUS, EMBASE	2
f329fbd5c127...	High-intensity interval training improves cardiovascular and physical health in patients with rheumatoid arthritis: a multicentre randomised controlled trial	2024	10.1136/bjsports-2024-108369	39179363	SCOPUS, EMBASE	2
926ce4431450...	The physiological and physical benefits of two types of concurrent training: a randomized controlled trial	2024	10.1186/s13102-023-00798-x		SCOPUS, EMBASE	2
8ba6cc2e3295...	Effects of HIIT training and HIIT combined with circuit resistance training on measures of physical fitness, miRNA expression, and metabolic risk factors in overweight/obese middle-aged women	2024	10.1186/s13102-024-00904-7		SCOPUS, EMBASE	2
6e0d1cd21626...	The association between maximal muscle strength, disease severity and psychopharmacotherapy among young to middle-aged inpatients with affective disorders – a prospective pilot study	2024	10.1186/s12888-024-05849-2	38811916	SCOPUS, EMBASE	2
664cb313d590...	Intermittent blood flow restriction with low-load resistance training for older adults with knee osteoarthritis: a randomized, controlled, non-inferiority trial protocol	2024	10.1186/s13063-024-08203-9	38822360	SCOPUS, EMBASE	2
bc3f6cd0c4a1...	The impact of exercise on growth factors in postmenopausal women: a systematic review and meta-analysis	2024	10.1186/s12905-024-03240-7	38987734	SCOPUS, EMBASE	2
e868485955ab...	The relationship between sarcopenia and related bioindicators and changes after intensive lifestyle intervention in elderly East-China populations	2024	10.1186/s12891-024-07835-x	39227842	SCOPUS, EMBASE	2
b33971a07087...	Does high-frequency resistance exercise offer additional benefits to older adults? learnings from a randomized controlled trial	2024	10.1186/s13102-024-00975-6		SCOPUS, EMBASE	2
55b1628e46b7...	The impact of expiratory muscle strength training on voluntary cough effectiveness in Huntington's disease	2024	10.1111/ene.16500	39344651	SCOPUS, EMBASE	2
703d148e389a...	A single-center, double-blind, randomized, placebo-controlled, two-arm study to evaluate the safety and efficacy of once-weekly sirolimus (rapamycin) on muscle strength and endurance in older adults following a 13-week exercise program	2024	10.1186/s13063-024-08490-2	39354527	SCOPUS, EMBASE	2
02f2f217f228...	The effect of Sarcomeal® oral supplementation plus vitamin D3 on muscle parameters and metabolic factors in diabetic sarcopenia patients: study protocol of a randomized controlled clinical trial	2024	10.1186/s13063-024-08700-x	39716287	SCOPUS, EMBASE	2
af76f2b079fd...	Feasibility and effectiveness of a 6-month, home-based, resistance exercise delivered by a remote technological solution in healthy older adults	2024	10.1016/j.archger.2024.105559	39018967	SCOPUS, EMBASE	2
20035bbc118e...	Associations between changes in leg extensor muscle power and physical function after supervised exercise in patients with hip osteoarthritis. Secondary analysis from the hip booster trial	2024	10.1016/j.ocarto.2024.100523		SCOPUS, EMBASE	2
ad58eaa0e2b4...	The effect of resistance training on patients with secondary sarcopenia: a systematic review and meta-analysis	2024	10.1038/s41598-024-79958-z	39567607	SCOPUS, EMBASE	2
784aafa3ec79...	A staged use of tourniquet does not influence the fast-track recovery after total knee arthroplasty: a prospective randomized study	2024	10.1007/s00402-024-05300-x	38568385	SCOPUS, EMBASE	2
c02eb850070c...	Effects of Creatine Supplementation and Resistance Training on Muscle Strength Gains in Adults <50 Years of Age: A Systematic Review and Meta-Analysis	2024	10.3390/nu16213665	39519498	SCOPUS, EMBASE	2
bd33693f3ec9...	Enhanced diaphragm excursion and exercise tolerance in COPD patients through inspiratory muscle training after standardised pulmonary rehabilitation: randomised controlled trial	2024	10.1183/23120541.00035-2024		SCOPUS, EMBASE	2
ab9160e5506a...	Possible Interaction Between Physical Exercise and Leptin and Ghrelin Changes Following Roux-en-Y Gastric Bypass in Sarcopenic Obesity Patients—A Pilot Study	2024	10.3390/nu16223913	39599699	SCOPUS, EMBASE	2
652a76f61a69...	Effect of home-based tongue-strengthening exercise using a portable tool on oropharyngeal muscles in older adults with sarcopenic dysphagia: A randomised controlled study	2024	10.1111/joor.13818	39073062	SCOPUS, EMBASE	2
8a684b26aa41...	Effects of over 10 weeks of resistance training on muscle and bone mineral density in older people with sarcopenia over 70 years old: A systematic review and meta-analysis of randomized controlled trials	2024	10.1016/j.gerinurse.2024.09.016	39368450	SCOPUS, EMBASE	2
e485436def22...	mHealth-assisted expiratory muscle strength training in Parkinson's disease patients: A proof-of-concept study	2024	10.1177/1877718X241296013	39957190	SCOPUS, EMBASE	2
365bef8f7bf7...	Comparative effects of cognitive and instability resistance training versus instability resistance training on balance and cognition in elderly women	2024	10.1038/s41598-024-77536-x	39472492	SCOPUS, EMBASE	2
d6afc685218e...	Tele-rehabilitation in COVID-19 survivors (TERCOV): An investigator-initiated, prospective, multi-center, real-world study	2024	10.1002/pri.2137	39425529	SCOPUS, EMBASE	2
01ac3a5aaa4c...	Beneficial effects of exercise, testosterone, vitamin D, calcium and protein in older men—A randomized clinical trial	2024	10.1002/jcsm.13498	38890228	SCOPUS, EMBASE	2
a9f1c3d9d439...	Effects of resistance exercise and whey protein supplementation on cognitive function in older men: secondary analysis of a randomised, double-blind, placebo-controlled trial	2024	10.1016/j.exger.2024.112477	38844183	SCOPUS, EMBASE	2
220be12871bc...	Effect of expiratory muscle strength training on voice and speech: An exploratory study in persons with Parkinson's disease or multiple sclerosis	2024	10.1080/17549507.2023.2243402	37787640	SCOPUS, EMBASE	2
481d011b01ae...	Slow-velocity eccentric-only resistance training improves symptoms of type 2 diabetic mellitus patients by regulating plasma MMP-2 and-9	2024	10.1097/MD.0000000000038855	39029066	SCOPUS, EMBASE	2
b4210cd36e6f...	Long-Term Effects of a 6-Week Power-Based Resistance Training and Fast Walking Interval Training Program on Physical Function, Muscle Power, Disability, and Frailty in Pre-Frail and Frail Older Adults	2024	10.1159/000536363	38574485	SCOPUS, EMBASE	2
1ec89b262577...	Heavy resistance training at retirement age induces 4-year lasting beneficial effects in muscle strength: A long-term follow-up of an RCT	2024	10.1136/bmjsem-2024-001899		SCOPUS, EMBASE	2
80bf8c8738aa...	Impact of resistance exercise program on muscle strength, cardiopulmonary function and glycolipid metabolism of bedridden population aged 80 years and above A randomized controlled trial	2024	10.1097/MD.0000000000038412	38875406	SCOPUS, EMBASE	2
d80099cc6536...	Effect of resistance training and chicken meat on muscle strength and mass and the gut microbiome of older women: A randomized controlled trial	2024	10.14814/phy2.16100	38888088	SCOPUS, EMBASE	2
8b23cae02219...	The impact of inertial exercises performed in the workplace on shoulder muscles' strength and muscles' fatigue resistance in women with disabilities	2024	10.13075/mp.5893.01503	38529799	SCOPUS, EMBASE	2
5c504ed0e1a2...	Combining functional exercises with exercise training in COPD: a randomized controlled trial	2024	10.1080/09593985.2022.2148146	36457177	SCOPUS, EMBASE	2
530188e86ca8...	Effect of lower-extremity muscle power training on muscle strength, balance function and walking ability in older adults with heart failure: a randomized controlled trial	2024	10.1007/s41999-023-00905-8	38147270	SCOPUS, EMBASE	2
253d8c5b5850...	Feasibility of Combining Functional Mobilisation with Resistance and Endurance Training for Mechanically Ventilated Patients in Intensive Care Unit Setting—A Pilot Study	2024	10.3390/jcm13082412		SCOPUS, EMBASE	2
26193f21e582...	Effects of oral oligopeptide preparation and exercise intervention in older people with sarcopenia: a randomized controlled trial	2024	10.1186/s12877-024-04860-2	38500043	SCOPUS, EMBASE	2
6bfe2651098f...	Is Resistance Training an Option to Improve Functionality and Muscle Strength in Middle-Aged People with Multiple Sclerosis? A Systematic Review and Meta-Analysis	2024	10.3390/jcm13051378		SCOPUS, EMBASE	2
6a71b1f43d67...	Evaluating the Effects of an Enhanced Strength Training Program in Remote Cardiological Rehabilitation: A Shift from Aerobic Dominance—A Pilot Randomized Controlled Trial	2024	10.3390/jcm13051445		SCOPUS, EMBASE	2
8e9accb9527b...	Long-chain n -3 polyunsaturated fatty acids for the management of age- and disease-related declines in skeletal muscle mass, strength and physical function	2024	10.1097/MCO.0000000000000986	37874045	SCOPUS, EMBASE	2
77f7c73f4832...	Improvement of muscle quality assessed using the phase angle is influenced by recovery of knee extension strength in patients with hip fractures	2024	10.1016/j.clnu.2024.02.003	38335802	SCOPUS, EMBASE	2
1f065dc416a3...	Responsiveness of respiratory function in Parkinson’s Disease to an integrative exercise programme: A prospective cohort study	2024	10.1371/journal.pone.0301433	38551984	SCOPUS, EMBASE	2
79f6b5180e21...	Functional mobility and physical fitness are improved through a multicomponent training program in institutionalized older adults	2024	10.1007/s11357-023-00877-4	37493861	SCOPUS, EMBASE	2
d53df19afcc6...	Effects of aerobic and combined aerobic-resistance exercise on motor function in sedentary older adults: A randomized clinical trial	2024	10.3233/BMR-220414	37661865	SCOPUS, EMBASE	2
4efda19f8cf4...	Eccentric and Concentric Strength Training in Patients with Knee Osteoarthritis: A Systematic Review	2024	10.1615/CritRevPhysRehabilMed.2023050048		SCOPUS, EMBASE	2
c0304adcea12...	Implementation of Pelvic Floor Muscle Strength Training in Women With Stress Urinary Incontinence	2024			SCOPUS, EMBASE	2
accf78259512...	Pre-operative gluteus medius tendon degeneration and its impact on strength and functional ability one year after total hip replacement	2024	10.1080/07853890.2024.2388701	39140369	SCOPUS, EMBASE	2
7b326af53928...	The Efficacy of Whole-Body Vibration in Managing Postburn Victims' Complications: A Systematic Review	2024	10.1093/jbcr/irad151	37791999	SCOPUS, EMBASE	2
620c09394837...	Effects of Ashwagandha (Withania somnifera) standardized root extract on physical endurance and VO (2max) in healthy adults performing resistance training: An eight-week, prospective, randomized, double-blind, placebo-controlled study	2024	10.12688/f1000research.130932.2	38988644	SCOPUS, EMBASE	2
dbe6e9037028...	The effectiveness of protein supplementation combined with resistance exercise programs among community-dwelling older adults with sarcopenia: a systematic review and meta-analysis	2024	10.4178/epih.e2024030	38374703	SCOPUS, EMBASE	2
6364c10cdd1e...	Does inflammation markers or treatment type moderate exercise intensity effects on changes in muscle strength in cancer survivors participating in a 6-month combined resistance- and endurance exercise program? Results from the Phys-Can trial	2023	10.1186/s13102-023-00617-3		SCOPUS, EMBASE	2
f75c359fa1e6...	Effects of Physical Activity Interventions on Strength, Balance and Falls in Middle-Aged Adults: A Systematic Review and Meta-Analysis	2023	10.1186/s40798-023-00606-3		SCOPUS, EMBASE	2
8f9ffd5cd9d7...	Effects of a multilevel intervention of resistance training with or without beta-hydroxy-beta-methylbutyrate in medical ICU patients during entire hospitalisation: a four-arm multicentre randomised controlled trial	2023	10.1186/s13054-023-04698-x	38102705	SCOPUS, EMBASE	2
c55a129e1a86...	Effect of home-based prehabilitation on postoperative complications after surgery for gastric cancer: randomized clinical trial	2023	10.1093/bjs/znad312	37750588	SCOPUS, EMBASE	2
8d7bffda997a...	Shoulder vibratory exercises improves shoulder external rotation muscle strength and shoulder function: Randomized comparison trial	2023	10.3233/BMR-220190	37458007	SCOPUS, EMBASE	2
b7cbd0da7be1...	Effects of perioperative exercise therapy combined with nutritional supplementation on functional recovery after fast-track total hip arthroplasty	2023	10.1016/j.jos.2022.09.012	36272926	SCOPUS, EMBASE	2
7fb9762146a0...	Impact of 14 Days of Bed Rest in Older Adults and an Exercise Countermeasure on Body Composition, Muscle Strength, and Cardiovascular Function: Canadian Space Agency Standard Measures	2023	10.1159/000534063	37717560	SCOPUS, EMBASE	2
0c2fc8b804db...	Omega-3 polyunsaturated fatty acids in sarcopenia management: A network meta-analysis of randomized controlled trials	2023	10.1016/j.arr.2023.102014	37442370	SCOPUS, EMBASE	2
2bc1d9cb59df...	Muscular Adaptations to Concurrent Resistance Training and High-Intensity Interval Training in Adults with Type 2 Diabetes: A Pilot Study	2023	10.3390/ijerph20186746	37754606	SCOPUS, EMBASE	2
631584c841bf...	Adding Non-Invasive Positive Pressure Ventilation to Supplemental Oxygen During Exercise Training in Severe Chronic Obstructive Pulmonary Disease: A Randomized Controlled Study	2023	10.5152/ThoracResPract.2023.23040		SCOPUS, EMBASE	2
6c8fc55ec83e...	Combined exercise and nutritional intervention for sarcopenia and frailty	2023	10.1159/000530786		EMBASE	2
1f11812589ed...	The efficacy of different interventions in the treatment of sarcopenia in middle-aged and elderly people: A network meta-analysis	2023	10.1097/MD.0000000000034254	37417618	SCOPUS, EMBASE	2
c29130bdc442...	Exploring the modification factors of exercise therapy on biomechanical load in patients with knee osteoarthritis: a systematic review and meta-analysis	2023	10.1007/s10067-023-06553-4	36879173	SCOPUS, EMBASE	2
69fe2a000cfd...	Exercise for sarcopenia in older people: A systematic review and network meta-analysis	2023	10.1002/jcsm.13225	37057640	SCOPUS, EMBASE	2
ae30eaf6c4d8...	Interval walking training in type 2 diabetes: A pilot study to evaluate the applicability as exercise therapy	2023	10.1371/journal.pone.0285762	37200321	SCOPUS, EMBASE	2
6092363c63a3...	Process evaluation of elastic resistance band training to benefit vertebral fracture risk in postmenopausal women	2023			EMBASE	2
211b3b57f93b...	Effects of blood flow restriction training on muscle strength, muscle mass and physical performance in older adults: a Meta-analysis	2023	10.12307/2023.097		SCOPUS, EMBASE	2
d3872c55c4e1...	The Effect of Low Intensity Resistance Training with Blood Flow Restriction on Fall Resistance in Middle-Aged and Older Adults: A Meta-Analysis	2023	10.3390/ijerph20064723	36981632	SCOPUS, EMBASE	2
d2392420770d...	Chronic Effects of Static Stretching Exercises on Muscle Strength and Power in Healthy Individuals Across the Lifespan: A Systematic Review with Multi-level Meta-analysis	2023	10.1007/s40279-022-01806-9	36719536	SCOPUS, EMBASE	2
eb2e34a6892f...	Protocol for a randomised, placebo-controlled, double-blinded clinical trial on the effect of oestrogen replacement on physical performance to muscle resistance exercise for older women with osteoarthritis of knee joint: the EPOK trial	2023	10.1186/s12877-023-03828-y	36800940	SCOPUS, EMBASE	2
90af250ee6bc...	Design and application of personalized exercise prescription for primary osteoporosis	2023	10.1097/MD.0000000000032857	36800636	SCOPUS, EMBASE	2
5e77ff878569...	Resistance training of peripheral muscles benefits respiratory parameters in older women with sarcopenia: Randomized controlled trial	2023	10.1016/j.archger.2022.104799	36070636	SCOPUS, EMBASE	2
05e27b0b15d6...	Combined L-Citrulline Supplementation and Slow Velocity Low-Intensity Resistance Training Improves Leg Endothelial Function, Lean Mass, and Strength in Hypertensive Postmenopausal Women	2023	10.3390/nu15010074	36615732	SCOPUS, EMBASE	2
e2e40c24bb98...	Effect of Electrical Muscle Stimulation and Resistance Exercise Intervention on Physical and Brain Function in Middle-Aged and Older Women	2023	10.3390/ijerph20010101	36612423	SCOPUS, EMBASE	2
2d427fcaf61a...	Does the Addition of Strength Training to a High-Intensity Interval Training Program Benefit More the Patients with Chronic Heart Failure?	2023	10.31083/j.rcm2401029		SCOPUS, EMBASE	2
fb887460a3c5...	Pharmacokinetics and effect of maslinic acid with physical exercise on grip strength and trunk muscle mass in healthy Japanese individuals	2023	10.3164/JCBN.23-5		SCOPUS, EMBASE	2
711a90282f13...	The role of resistance training and creatine supplementation on oxidative stress, antioxidant defense, muscle strength, and quality of life in older adults	2023	10.3389/fpubh.2023.1062832	37206869	SCOPUS, EMBASE	2
8878707e6244...	Effects of low-intensity resistance exercise with blood flow restriction after high tibial osteotomy in middle-aged women	2022	10.1097/MD.0000000000032294	36595769	SCOPUS, EMBASE	2
94a268675dcf...	The chronic effects of eccentric exercise interventions in different populations: An umbrella review	2022	10.4081/ejtm.2022.10876		SCOPUS, EMBASE	2
1ef83258ab3f...	Using exergame-based exercise to prevent and postpone the loss of muscle mass, muscle strength, cognition, and functional performance among elders in rural long-term care facilities: A protocol for a randomized controlled trial	2022	10.3389/fmed.2022.1071409		SCOPUS, EMBASE	2
b9018ea56834...	Effect of resistance exercise on serum leptin levels in a prospective longitudinal study of women patients with rheumatoid arthritis	2022	10.1186/s13075-022-02765-2	35346353	SCOPUS, EMBASE	2
8664303bd43d...	Fish oil administration combined with resistance exercise training improves strength, resting metabolic rate, and inflammation in older adults	2022	10.1007/s40520-022-02250-5	36136236	SCOPUS, EMBASE	2
e06dba2511ea...	Effects of Twenty-Four Weeks of Resistance Exercise Training on Body Composition, Bone Mineral Density, Functional Fitness and Isokinetic Muscle Strength in Obese Older Women: A Randomized Controlled Trial	2022	10.3390/ijerph192114554	36361434	SCOPUS, EMBASE	2
807940d5c6c4...	The effects of elastic band exercise on the pain, kinesiophobia, functional, and psychological status after total knee arthroplasty: a randomized controlled trial	2022	10.1007/s10067-022-06266-0	35776283	SCOPUS, EMBASE	2
d72b92dad42f...	Effect of Whey Protein Supplementation in Postmenopausal Women: A Systematic Review and Meta-Analysis	2022	10.3390/nu14194210	36235862	SCOPUS, EMBASE	2
0b16a6b98f39...	Effect Of Exercise on Muscle Mass, Fat Mass, Bone Mass, Muscular Strength and Physical Performance in Community Dwelling Older Adults: Systematic Review and Meta-Analysis	2022	10.14336/AD.2022.0215		SCOPUS, EMBASE	2
5c2fa29e2930...	Effectiveness of Blood Flow Restriction Training on Muscle Strength and Physical Performance in Older Adults: A Systematic Review and Meta-analysis	2022	10.1016/j.apmr.2021.12.015	35026149	SCOPUS, EMBASE	2
f7d9ae837e18...	Effect of a home-based resistance exercise program in elderly participants with osteoporosis: a randomized controlled trial	2022	10.1007/s00198-022-06456-1	35704055	SCOPUS, EMBASE	2
76bbfda293ef...	The Effects of Low-intensity Resistance Training with Blood Flow Restriction Versus Traditional Resistance Exercise on Lower Extremity Muscle Strength, Walking Capacity, and Balance in Ischemic Stroke Survivors: A Study Protocol for the BFR-Stroke RESILIENCE Trial	2022	10.4274/haseki.galenos.2022.8361		SCOPUS, EMBASE	2
f8cb3b96df80...	Effects of strength exercises combined with other training on physical performance in frail older adults: A systematic review and meta-analysis	2022	10.1016/j.archger.2022.104757	35777245	SCOPUS, EMBASE	2
88a84052aaa7...	Effects of Carbohydrate and Protein Administration by Food Items on Strength Response after Training in Stable COPD	2022	10.3390/nu14173565	36079823	SCOPUS, EMBASE	2
4b5f83ad9f67...	Effects of vibration training vs. conventional resistance training among community-dwelling older people with sarcopenia: three-arm randomized controlled trial protocol	2022	10.3389/fnagi.2022.905460		SCOPUS, EMBASE	2
d3937eefa619...	Benefits of Pulmonary Rehabilitation in Patients with Idiopathic Pulmonary Fibrosis Receiving Antifibrotic Drug Treatment	2022	10.3390/jcm11185336		SCOPUS, EMBASE	2
d31a1f763cc7...	Center-Based vs Home-Based Geriatric Rehabilitation on Sarcopenia Components: A Systematic Review and Meta-analysis	2022	10.1016/j.apmr.2021.12.016	35026150	SCOPUS, EMBASE	2
a76a08aa8d8d...	Exercise Intervention as a Therapy in Patients with Diabetes Mellitus and Sarcopenia: A Meta-Analysis	2022	10.1007/s13300-022-01275-3		SCOPUS, EMBASE	2
38f6a3fd9dfe...	Effects of gravitational versus iso-inertial resistance training on leg muscle force and metabolic cost of walking in healthy older adults	2022	10.23736/S0022-4707.21.12649-0	34498822	SCOPUS, EMBASE	2
809bd4100cee...	Effectiveness of Using Virtual Reality–Supported Exercise Therapy for Upper Extremity Motor Rehabilitation in Patients with Stroke: Systematic Review and Meta-analysis of Randomized Controlled Trials	2022	10.2196/24111	35723907	SCOPUS, EMBASE	2
ad070cb3a6dc...	Training Session and Detraining Duration Affect Lower Limb Muscle Strength Maintenance in Middle-Aged and Older Adults: A Systematic Review and Meta-Analysis	2022	10.1123/japa.2020-0493	34510028	SCOPUS, EMBASE	2
c9898047be90...	Efficacy of resistance training during adjuvant chemotherapy and radiation therapy in cancer care: a systematic review and meta-analysis	2022	10.1007/s00520-021-06708-6	34993651	SCOPUS, EMBASE	2
3b75d74e9f23...	Parkinson’s disease and intensive exercise therapy — An updated systematic review and meta-analysis	2022	10.1111/ane.13579	34997759	SCOPUS, EMBASE	2
028591605e34...	Progressive Resistance Training Program Characteristics in Rehabilitation Programs Following Hip Fracture: A Meta-Analysis and Meta-Regression	2022	10.1177/21514593221090799		SCOPUS, EMBASE	2
ed2091bb7a8c...	Effectiveness of combined conventional treatment with a tailored exercise training program on wound healing in patients with venous leg ulcer: A randomized controlled trial	2022	10.1016/j.jtv.2021.06.010	34215501	SCOPUS, EMBASE	2
ae027ae0cf09...	Effects of repetitive transcranial magnetic stimulation on recovery in lower limb muscle strength and gait function following spinal cord injury: a randomized controlled trial	2022	10.1038/s41393-021-00703-8	34504284	SCOPUS, EMBASE	2
f1c71971b38c...	Effects of resistance exercise and whey protein supplementation on skeletal muscle strength, mass, physical function, and hormonal and inflammatory biomarkers in healthy active older men: a randomised, double-blind, placebo-controlled trial	2022	10.1016/j.exger.2021.111651	34896568	SCOPUS, EMBASE	2
5581d78bfe70...	Myokine Expression and Tumor-Suppressive Effect of Serum after 12 wk of Exercise in Prostate Cancer Patients on ADT	2022	10.1249/MSS.0000000000002783	34559721	SCOPUS, EMBASE	2
420e3118ecca...	Neuromuscular adaptations after 12 weeks of light- vs. heavy-load power-oriented resistance training in older adults	2022	10.1111/sms.14073	34618979	SCOPUS, EMBASE	2
468eff4c7920...	Proteomic Investigation in Plasma from Women with Fibromyalgia in Response to a 15-wk Resistance Exercise Intervention	2022	10.1249/MSS.0000000000002790	35029590	SCOPUS, EMBASE	2
9a40da92cbe2...	Effects of vitamin D3 supplementation and resistance training on 25-hydroxyvitamin d status and functional performance of older adults: A randomized placebo-controlled trial	2022	10.3390/nu14010086		SCOPUS, EMBASE	2
6546e0c08404...	Sarcojoint®, the branched-chain amino acid-based supplement, plus resistance exercise improved muscle mass in adults aged 50 years and older: A double-blinded randomized controlled trial	2022	10.1016/j.exger.2021.111644	34838980	SCOPUS, EMBASE	2
28c9d1364592...	Effects of Cardiac Rehabilitation with Lumbar-Type Hybrid Assistive Limb on Muscle Strength in Patients with Chronic Heart Failure	2022	10.1253/circj.CJ-21-0381	34511585	SCOPUS, EMBASE	2
17e419e0e1a9...	Improved Muscle Strength, Muscle Power, and Physical Function After Flywheel Resistance Training in Healthy Older Adults: A Randomized Controlled Trial	2022	10.1519/JSC.0000000000003428	32040028	SCOPUS, EMBASE	2
e70d4d082b9f...	Effects of different exercise training modes on muscle strength and physical performance in older people with sarcopenia: a systematic review and meta-analysis	2021	10.1186/s12877-021-02642-8	34911483	SCOPUS, EMBASE	2
b06c699ed2ea...	What are the impact and the optimal design of a physical prehabilitation program in patients with esophagogastric cancer awaiting surgery? A systematic review	2021	10.1186/s13102-021-00260-w		SCOPUS, EMBASE	2
c9f99e4cd9b0...	Efficacy of low-load resistance training combined with blood flow restriction vs. high-load resistance training on sarcopenia among community-dwelling older Chinese people: study protocol for a 3-arm randomized controlled trial	2021	10.1186/s13063-021-05495-z	34348792	SCOPUS, EMBASE	2
3244e87e3948...	Effects of different types of contraction exercises on shoulder function and muscle strength in patients with adhesive capsulitis	2021	10.3390/ijerph182413078	34948688	SCOPUS, EMBASE	2
588bfd6b4f8a...	Effect of Tai Chi exercise on lower limb function and balance ability in patients with knee osteoarthritis: A protocol of a randomized controlled trial	2021	10.1097/MD.0000000000027647	34797287	SCOPUS, EMBASE	2
33f8551a0cc4...	Does the combination of resistance training and a nutritional intervention have a synergic effect on muscle mass, strength, and physical function in older adults? A systematic review and meta-analysis	2021	10.1186/s12877-021-02491-5	34772342	SCOPUS, EMBASE	2
4d202b31f846...	Effects of exercise and/or β-hydroxy-β-methylbutyrate supplementation on muscle mass, muscle strength, and physical performance in older women with low muscle mass: A randomized, double-blind, placebo-controlled trial	2021	10.1093/ajcn/nqab176	34081113	SCOPUS, EMBASE	2
81825bf54784...	Musculoskeletal Responses to Exercise Plus Nutrition in Men with Prostate Cancer on Androgen Deprivation: A 12-Month RCT	2021	10.1249/MSS.0000000000002682	33867499	SCOPUS, EMBASE	2
928d0b7e13de...	Introducing Progressive Strength Training Program in Singapore's Elder Care Settings	2021	10.3389/fmed.2021.515898		SCOPUS, EMBASE	2
f15621744ed9...	Two-Year Follow-up of a Multimodal Intervention on Functional Capacity and Muscle Power in Frail Patients With Type 2 Diabetes	2021	10.1016/j.jamda.2021.06.022	34265268	SCOPUS, EMBASE	2
d384b27798a3...	Serum albumin levels as a predictive biomarker for low-load resistance training programs' effects on muscle thickness in the community-dwelling elderly Japanese population: interventional study result	2021	10.1186/s12877-021-02403-7	34407763	SCOPUS, EMBASE	2
10d3fae255d1...	Effects of Combined Endurance and Resistance Training in Women With Multiple Sclerosis: A Randomized Controlled Study	2021	10.3389/fneur.2021.698460		SCOPUS, EMBASE	2
bd5f94be7a20...	Unsupervised home-based resistance training for community-dwelling older adults: A systematic review and meta-analysis of randomized controlled trials	2021	10.1016/j.arr.2021.101368	34022464	SCOPUS, EMBASE	2
d3832c70f4af...	Effects of milk protein in resistance training-induced lean mass gains for older adults aged ≥ 60 y: A systematic review and meta-analysis	2021	10.3390/nu13082815	34444975	SCOPUS, EMBASE	2
5634cea248f4...	Effects of exercise in patients with connective tissue disease receiving high-dose glucocorticoids: A pilot prospective cohort study	2021	10.1007/s00421-021-04697-2	33914153	SCOPUS, EMBASE	2
1de7636abab4...	The influence of resistance training on neuromuscular function in middle-aged and older adults: A systematic review and meta-analysis of randomised controlled trials.	2021	10.1016/j.exger.2021.111320	33774145	SCOPUS, EMBASE	2
8dfbf25e5562...	Low-Load Unilateral and Bilateral Resistance Training to Restore Lower Limb Function in the Early Rehabilitation After Total Knee Arthroplasty: A Randomized Active-Controlled Clinical Trial	2021	10.3389/fmed.2021.628021		SCOPUS, EMBASE	2
1987b5c2a2e3...	Cardiac Rehabilitation and Complementary Physical Training in Elderly Patients after Acute Coronary Syndrome: A Pilot Study	2021	10.3390/medicina57060529	34070257	SCOPUS, EMBASE	2
260ad82ff6a5...	Iron beats electricity: Resistance training but not whole-body electromyostimulation improves cardiometabolic health in obese metabolic syndrome patients during caloric restriction—a randomized-controlled study	2021	10.3390/nu13051640	34068089	SCOPUS, EMBASE	2
fd70563a3afd...	Home-based exercise programmes improve physical fitness of healthy older adults: A PRISMA-compliant systematic review and meta-analysis with relevance for COVID-19	2021	10.1016/j.arr.2021.101265	33571702	SCOPUS, EMBASE	2
68e9b21c5df6...	Nonpharmacological interventions for respiratory health in Parkinson’s disease: A systematic review and meta-analysis	2021	10.1111/ene.14605	33098349	SCOPUS, EMBASE	2
25e8d6fa5f0a...	Effect of Antihypertensive and Statin Medication Use on Muscle Performance in Community-Dwelling Older Adults Performing Strength Training	2021	10.1007/s40266-020-00831-5	33543410	SCOPUS, EMBASE	2
e6a7b287c33c...	Resistance Exercise Dosage in Men with Prostate Cancer: Systematic Review, Meta-analysis, and Meta-regression	2021	10.1249/MSS.0000000000002503	32890199	SCOPUS, EMBASE	2
ae77501c1392...	Effects of Power-Oriented Resistance Training With Heavy vs. Light Loads on Muscle-Tendon Function in Older Adults: A Study Protocol for a Randomized Controlled Trial	2021	10.3389/fphys.2021.635094		SCOPUS, EMBASE	2
2095d91e7d51...	Low-intensity resistance training with moderate blood flow restriction appears safe and increases skeletal muscle strength and size in cardiovascular surgery patients: A pilot study	2021	10.3390/jcm10030547		SCOPUS, EMBASE	2
c81bc047836d...	Effect of a Multicomponent Exercise Program (VIVIFRAIL) on Functional Capacity in Elderly Ambulatory: A Non-Randomized Clinical Trial in Mexican Women with Dynapenia	2021	10.1007/s12603-020-1548-4	33491027	SCOPUS, EMBASE	2
342e0b6f2945...	Resistance band training after triamcinolone acetonide injection for subacromial bursitis: A randomized clinical trial	2021	10.2340/16501977-2752	33043381	SCOPUS, EMBASE	2
5bcc67dd6777...	Effects of resistance training using elastic bands on muscle strength with or without a leucine supplement for 48 weeks in elderly patients with type 2 diabetes	2021	10.1507/endocrj.EJ20-0550	33071273	SCOPUS, EMBASE	2
c6494e1626bd...	Non-randomized preliminary study of an education and elastic-band resistance exercise program on severity of neuropathy, physical function, muscle strength and endurance & quality of life in colorectal cancer patients experiencing oxaliplatin-induced peripheral neuropathy	2020	10.1016/j.ejon.2020.101834	33120223	SCOPUS, EMBASE	2
f9dd350873a8...	Effect of exergames on physical outcomes in frail elderly: a systematic review	2020	10.1007/s40520-019-01344-x	31520334	SCOPUS, EMBASE	2
a04adc1b789c...	How do resistance training and balance and motor control training affect gait performance and fatigue impact in people with multiple sclerosis? A randomized controlled multi-center study	2020	10.1177/1352458519865740	31339460	SCOPUS, EMBASE	2
1559bdb11dfe...	PRIME-HF: Novel Exercise for Older Patients with Heart Failure. A Pilot Randomized Controlled Study	2020	10.1111/jgs.16428	32293033	SCOPUS, EMBASE	2
50235d42d74d...	Effectiveness of protein supplementation combined with resistance training on muscle strength and physical performance in elderly: A systematic review and meta-analysis	2020	10.3390/nu12092607	32867103	SCOPUS, EMBASE	2
93850a4642f2...	Resistance exercise, electrical muscle stimulation, and whole-body vibration in older adults: Systematic review and meta-analysis of randomized controlled trials	2020	10.3390/jcm9092902		SCOPUS, EMBASE	2
7351bca0d0f3...	Effects of an 8-week resistance training intervention on plantar flexor muscle quality and functional capacity in older women: A randomised controlled trial	2020	10.1016/j.exger.2020.111003	32562747	SCOPUS, EMBASE	2
65b8b2c185d1...	Safety and Effectiveness of Progressive Moderate-to-Vigorous Intensity Elastic Resistance Training on Physical Function and Pain in People With Hemophilia	2020	10.1093/ptj/pzaa106	32525975	SCOPUS, EMBASE	2
84ca3b7b3688...	Effectiveness of high intensity interval training supplemented with peripheral and inspiratory resistance training in chronic heart failure: a pilot study	2020	10.1080/00015385.2019.1591676	31125296	SCOPUS, EMBASE	2
576abbf104ab...	Effect of lean red meat combined with a multicomponent exercise program on muscle and cognitive function in older adults: A 6-month randomized controlled trial	2020	10.1093/ajcn/nqaa104		EMBASE	2
f94e8e44bb22...	Effect of resistance training on quality of life in older people with sarcopenic obesity living in long-term care institutions: A quasi-experimental study	2020	10.1111/jocn.15277	32279360	SCOPUS, EMBASE	2
afd9f700eb0e...	Heavy Resistance Training in Breast Cancer Patients Undergoing Adjuvant Therapy	2020	10.1249/MSS.0000000000002260	31876673	SCOPUS, EMBASE	2
56cbb312dfc7...	The impact of malnutrition on acute muscle wasting in frail older hospitalized patients	2020	10.3390/nu12051387	32408708	SCOPUS, EMBASE	2
1788a2928651...	A 12-week exercise program for patients with hip osteoarthritis has no influence on gait parameters: A secondary analysis of a randomized controlled trial	2020	10.1016/j.gaitpost.2020.03.001	32151918	SCOPUS, EMBASE	2
62829f3b0712...	The effect of aerobic and resistance exercise training on the health related quality of life, physical function, and muscle strength among hemodialysis patients with Type 2 diabetes	2020	10.1016/j.jbmt.2019.10.003	32507160	SCOPUS, EMBASE	2
3a0b5175a1dd...	Exploring the efficacy of the expiratory muscle strength trainer to improve swallowing in inclusion body myositis: A pilot study	2020	10.1016/j.nmd.2020.02.010	32307229	SCOPUS, EMBASE	2
771246844c3d...	Effect of therapeutic exercise routine on pain, disability, posture, and health status in dentists with chronic neck pain: a randomized controlled trial	2020	10.1007/s00420-019-01480-x	31654125	SCOPUS, EMBASE	2
0cb687ee5534...	Effects of resistance exercise on glycated hemoglobin and functional performance in older patients with comorbid diabetes mellitus and knee osteoarthritis: A randomized trial	2020	10.3390/ijerph17010224	31892277	SCOPUS, EMBASE	2
3774e2dc42df...	Inertial training improves strength, balance, and gait speed in elderly nursing home residents	2020	10.2147/CIA.S234299	32103920	SCOPUS, EMBASE	2
cf84dbe4be8c...	Exercise programs for muscle mass, muscle strength and physical performance in older adults with sarcopenia: A systematic review and meta-analysis	2020	10.14336/AD.2019.1012		SCOPUS, EMBASE	2
e1fb39c09261...	Heavy-load resistance exercise during chemotherapy in physically inactive breast cancer survivors at risk for lymphedema: a randomized trial	2019	10.1080/0284186X.2019.1643916	31354000	SCOPUS, EMBASE	2
71b1d3fd32e1...	Exercise-based cardiac rehabilitation for patients with catheter ablation for persistent atrial fibrillation: A randomized controlled clinical trial	2019	10.1177/2047487319859974	31272205	SCOPUS, EMBASE	2
764f543c6a2f...	Exercise-induced pain changes associate with changes in muscle perfusion in knee osteoarthritis: Exploratory outcome analyses of a randomised controlled trial	2019	10.1186/s12891-019-2858-8	31656173	SCOPUS, EMBASE	2
8202f1d5dff7...	Dual-task training on cognition and resistance training improved both balance and working memory in older people	2019	10.1080/00913847.2019.1623996	31155997	SCOPUS, EMBASE	2
eef75b689809...	Health benefits of β-hydroxy-β-methylbutyrate (Hmb) supplementation in addition to physical exercise in older adults: A systematic review with meta-analysis	2019	10.3390/nu11092082	31484462	SCOPUS, EMBASE	2
9d161bfbdec6...	Effectiveness of combined eccentric and concentric exercise over traditional cardiac exercise rehabilitation programme in patients with chronic heart failure: Protocol for a randomised controlled study	2019	10.1136/bmjopen-2018-028749	31558450	SCOPUS, EMBASE	2
3c2d3166fa24...	Combined aerobic and resistance training improves microcirculation in metabolic syndrome	2019	10.23736/S0022-4707.18.09077-1	30421869	SCOPUS, EMBASE	2
e6ac5677bb41...	Prevalence of sarcopenia in patients with geriatric depression diagnosis	2019	10.1007/s11845-018-01957-7	30610679	SCOPUS, EMBASE	2
5550a01c3186...	Effects of free weights and machine training on muscular strength in high-functioning older adults	2019	10.1016/j.exger.2019.03.012	30980922	SCOPUS, EMBASE	2
61199f4ce706...	Effects of β-hydroxy-β-methylbutyrate (HMB) supplementation in addition to multicomponent exercise in adults older than 70 years living in nursing homes, a cluster randomized placebo-controlled trial: the HEAL study protocol	2019	10.1186/s12877-019-1200-5	31277595	SCOPUS, EMBASE	2
dc0d95fe40bd...	Cycle ergometer training vs resistance training in ICU-acquired weakness	2019	10.1111/ane.13102	30977897	SCOPUS, EMBASE	2
29564de6b303...	Twenty-four-week hospital-based progressive resistance training on functional recovery in female patients post total knee arthroplasty	2019	10.1016/j.knee.2019.02.008	30902510	SCOPUS, EMBASE	2
c246f1bf90d2...	Improvement in Skeletal Muscle Strength and Plasma Levels of Follistatin and Myostatin Induced by an 8-Week Resistance Training and Epicatechin Supplementation in Sarcopenic Older Adults	2019	10.1123/japa.2017-0389	30299198	SCOPUS, EMBASE	2
2cf972f73fc1...	Synergistic effect of bodyweight resistance exercise and protein supplementation on skeletal muscle in sarcopenic or dynapenic older adults	2019	10.1111/ggi.13643	30864254	SCOPUS, EMBASE	2
3027a323f2af...	Preoperative high-intensity strength training improves postural control after TKA: randomized-controlled trial	2019	10.1007/s00167-018-5246-2	30361758	SCOPUS, EMBASE	2
bd01c2aef6f6...	Karate Intervention to Change Kinematic Outcomes in Parkinson's Disease.	2019			EMBASE	2
da0d9b4e3fa4...	Inspiratory muscle strength training improves lung function in patients with the hypermobile Ehlers–Danlos syndrome: A randomized controlled trial	2019	10.1002/ajmg.a.61016	30569502	SCOPUS, EMBASE	2
e98b32f9e98d...	Effects of resistance training and/or beta-hydroxy-beta-methylbutyrate supplementation on muscle mass, muscle strength and physical performance in older women with reduced muscle mass: protocol for a randomised, double-blind, placebo-controlled trial	2019	10.1136/bmjopen-2018-025723	30819711	EMBASE	2
6b09979a4ee9...	Relationship of Physical Function to Single Muscle Fiber Contractility in Older Adults: Effects of Resistance Training With and Without Caloric Restriction	2019	10.1093/gerona/gly047	29546320	SCOPUS, EMBASE	2
d61b5a499e89...	Effects of a leucine-enriched amino acid supplement on muscle mass, muscle strength, and physical function in post-stroke patients with sarcopenia: A randomized controlled trial	2019	10.1016/j.nut.2018.05.028	30273819	SCOPUS, EMBASE	2
f2e46f3d83d7...	Effect and feasibility of non-linear periodized resistance training in people with COPD: Study protocol for a randomized controlled trial	2019	10.1186/s13063-018-3129-y	30606240	SCOPUS, EMBASE	2
0afd27372f30...	Circulating irisin and myostatin as markers of muscle strength and physical condition in elderly subjects	2019	10.3389/fphys.2019.00871		SCOPUS, EMBASE	2
cc540acb2466...	Exercise training-induced effects on the abdominal subcutaneous adipose tissue phenotype in humans with obesity	2018	10.1152/japplphysiol.00496.2018	30212302	SCOPUS, EMBASE	2
8dadd69d486e...	Resistance training improves neuromuscular health in the elderly with type 2 diabetes: A randomised clinical trial	2018	10.1007/s00125-018-4693-0		EMBASE	2
4aef1832082c...	Sarcopenia: A Rheumatic Disease?	2018	10.1016/j.rdc.2018.03.001	30001782	SCOPUS, EMBASE	2
587d24533ff1...	No Exacerbation of Knee Joint Pain and Effusion Following Preoperative Progressive Resistance Training in Patients Scheduled for Total Knee Arthroplasty: Secondary Analyses From a Randomized Controlled Trial	2018	10.1016/j.pmrj.2017.11.002	29129608	SCOPUS, EMBASE	2
c2be9a1d765c...	Highly favorable physiological responses to concurrent resistance and high-intensity interval training during chemotherapy: the OptiTrain breast cancer trial	2018	10.1007/s10549-018-4663-8	29349712	SCOPUS, EMBASE	2
167caa43a031...	Physical activity combined with resistance training reduces symptoms of frailty in older adults: A randomized controlled trial	2018	10.1016/j.archger.2018.02.005	29455058	SCOPUS, EMBASE	2
86eacccd346a...	Exercise alone or combined with dietary supplements for sarcopenic obesity in community-dwelling older people: A systematic review of randomized controlled trials	2018	10.1016/j.maturitas.2018.02.005	29563041	SCOPUS, EMBASE	2
74f3dbea502d...	Effects of home-based lower limb resistance training on muscle strength and functional status in stable Chronic obstructive pulmonary disease patients	2018	10.1111/jocn.14131	29076609	SCOPUS, EMBASE	2
cf08536ba480...	A resistance exercise program improves functional capacity of patients with psoriatic arthritis: a randomized controlled trial	2018	10.1007/s10067-017-3917-x	29185133	SCOPUS, EMBASE	2
493e2de6b441...	Protein-enriched, milk-based supplement to counteract sarcopenia in acutely ill geriatric patients offered resistance exercise training during and after hospitalisation: Study protocol for a randomised, double-blind, multicentre trial	2018	10.1136/bmjopen-2017-019210	29391380	SCOPUS, EMBASE	2
65ac548f05c4...	Effects of resistance training on body composition and functional capacity among sarcopenic obese residents in long-term care facilities: a preliminary study	2018	10.1186/s12877-018-0714-6	29357826	SCOPUS, EMBASE	2
389146ba12b9...	Functional outcomes and quality of life after a 6-month early intervention program for oral cancer survivors: A single-arm clinical trial	2018	10.7717/peerj.4419		SCOPUS, EMBASE	2
5b14d6035fdc...	Twelve weeks’ progressive resistance training combined with protein supplementation beyond habitual intakes increases upper leg lean tissue mass, muscle strength and extended gait speed in healthy older women	2017	10.1007/s10522-016-9671-7	27933408	SCOPUS, EMBASE	2
5335b20f30da...	Effects of aerobic and resistance training combined with fortified milk on muscle mass, muscle strength, and physical performance in older adults: A randomized controlled trial	2017	10.1007/s12603-016-0864-1	29188900	SCOPUS, EMBASE	2
18404c35a316...	Effects of Combined Aerobic-Strength Training vs Fitness Education Program in COPD Patients	2017	10.1055/s-0043-112339	28982202	SCOPUS, EMBASE	2
df35b7ca41be...	Effects of Supervised vs. Unsupervised Training Programs on Balance and Muscle Strength in Older Adults: A Systematic Review and Meta-Analysis	2017	10.1007/s40279-017-0747-6	28573401	SCOPUS, EMBASE	2
9cb430377d79...	Resistance Training Improves Sleep Quality in Subjects With Moderate Parkinson's Disease	2017	10.1519/JSC.0000000000001685	27787472	SCOPUS, EMBASE	2
e8ae852d53f6...	Preoperative exercise training prevents functional decline after lung resection surgery: a randomized, single-blind controlled trial	2017	10.1177/0269215516684179	28730888	SCOPUS, EMBASE	2
7a3b2f5267bb...	Effectiveness of nutritional and exercise interventions to improve body composition and muscle strength or function in sarcopenic obese older adults: A systematic review	2017	10.1016/j.nutres.2017.05.002	28739051	SCOPUS, EMBASE	2
57af171eb343...	Muscle strength and cognition in ageing men and women: The DR's EXTRA study	2017	10.1016/j.eurger.2017.04.004		SCOPUS, EMBASE	2
780dbdc6ea87...	Effects of High- and Low-Velocity Resistance Training on Gait Kinematics and Kinetics in Individuals with Hip Osteoarthritis: A Randomized Controlled Trial	2017	10.1097/PHM.0000000000000640	27754998	SCOPUS, EMBASE	2
cf3d0548431d...	Exercise therapy in patients with hip osteoarthritis: Effect on hip muscle strength and safety aspects of exercise—results of a randomized controlled trial	2017	10.1080/14397595.2016.1213940	27486681	SCOPUS, EMBASE	2
b2b3836c6b6c...	Effects of an integrated health education and elastic band resistance training program on physical function and muscle strength in community-dwelling elderly women: Healthy Aging and Happy Aging II study	2017	10.1111/ggi.12795	27138245	SCOPUS, EMBASE	2
840606bbfe6c...	Muscle strength in breast cancer patients receiving different treatment regimes	2017	10.1002/jcsm.12165	27896952	SCOPUS, EMBASE	2
ba357dda3465...	Effects of 12 weeks resistance training on serum irisin in older male adults	2017	10.3389/fphys.2017.00171		SCOPUS, EMBASE	2
07ecc817a6e8...	Mediation of Cognitive Function Improvements by Strength Gains After Resistance Training in Older Adults with Mild Cognitive Impairment: Outcomes of the Study of Mental and Resistance Training	2017	10.1111/jgs.14542	28304092	SCOPUS, EMBASE	2
58331d2da2fa...	Effect of expiratory muscle strength training intervention on the maximum expiratory pressure and quality of life of patients with Parkinson disease	2017	10.3233/NRE-171474	28527233	SCOPUS, EMBASE	2
f73361d6a27e...	Tongue-to-palate resistance training improves tongue strength and oropharyngeal swallowing function in subacute stroke survivors with dysphagia	2017	10.1111/joor.12461	27883209	SCOPUS, EMBASE	2
a94e237e00de...	Effects of resistance expiratory muscle strength training in elderly patients with dysphagic stroke	2017	10.3233/NRE-172192	29254116	SCOPUS, EMBASE	2
b5a2b21027cf...	Resistance Training with Instability for Patients with Parkinson's Disease	2016	10.1249/MSS.0000000000000945	27054681	SCOPUS, EMBASE	2
89155a00e60b...	Effects of resistance training on muscle strength, exercise capacity, and mobility in middle-aged and elderly patients with coronary artery disease: A meta-analysis	2016	10.1016/j.jjcc.2015.09.005	26690738	SCOPUS, EMBASE	2
e120a021f84e...	Positive effects of 1-year football and strength training on mechanical muscle function and functional capacity in elderly men	2016	10.1007/s00421-016-3368-0	27068158	SCOPUS, EMBASE	2
9fbf2ce034c0...	Effects of expiratory muscle strength training on oropharyngeal dysphagia in subacute stroke patients: a randomised controlled trial	2016	10.1111/joor.12382	26803525	SCOPUS, EMBASE	2
83f87314c8bf...	Controlled pilot study of the effects of power yoga in Parkinson's disease	2016	10.1016/j.ctim.2016.01.007	27062960	SCOPUS, EMBASE	2
52a181585be2...	Effects and feasibility of exercise therapy combined with branched-chain amino acid supplementation on muscle strengthening in frail and pre-frail elderly people requiring long-term care: a crossover trial	2016	10.1139/apnm-2015-0436	26963483	SCOPUS, EMBASE	2
0cf61caba7df...	Inpatient rehabilitation improves functional capacity, peripheral muscle strength and quality of life in patients with community-acquired pneumonia: a randomised trial	2016	10.1016/j.jphys.2016.02.014	26996093	SCOPUS, EMBASE	2
a723ef510447...	Preoperative progressive explosive-type resistance training is feasible and effective in patients with hip osteoarthritis scheduled for total hip arthroplasty - a randomized controlled trial	2016	10.1016/j.joca.2015.07.030	26285180	SCOPUS, EMBASE	2
0a3b75589bb5...	Dose-Response Relationships of Resistance Training in Healthy Old Adults: A Systematic Review and Meta-Analysis	2015	10.1007/s40279-015-0385-9	26420238	SCOPUS, EMBASE	2
6484e725c141...	Oxandrolone Augmentation of Resistance Training in Older Women: A Randomized Trial	2015	10.1249/MSS.0000000000000690	25899102	SCOPUS, EMBASE	2
806feaa935a5...	Does training frequency and supervision affect compliance, performance and muscular health? A cluster randomized controlled trial	2015	10.1016/j.math.2015.01.016	25816746	SCOPUS, EMBASE	2
ee98ba47bd33...	Rehabilitation procedures in the management of gait disorders in the elderly	2015			SCOPUS, EMBASE	2
d3fd250e6069...	Does vitamin-D intake during resistance training improve the skeletal muscle hypertrophic and strength response in young and elderly men? - A randomized controlled trial	2015	10.1186/s12986-015-0029-y		SCOPUS, EMBASE	2
041b62204b2b...	Exercise therapy for fatigue in multiple sclerosis	2015	10.1002/14651858.CD009956.pub2	26358158	SCOPUS, EMBASE	2
6907f362ea30...	Supervised physical exercise improves VO(2max), quality of life, and health in early stage breast cancer patients: a randomized controlled trial	2015	10.1007/s10549-015-3541-x	26293147	SCOPUS, EMBASE	2
bcb45a90a3aa...	Effects of feedback-based balance and core resistance training vs. Pilates training on balance and muscle function in older women: A randomized-controlled trial	2015	10.1016/j.archger.2015.05.009	26036209	SCOPUS, EMBASE	2
ec853162e489...	Collagen peptide supplementation in combination with resistance training improves body composition and increases muscle strength in elderly sarcopenic men: A randomised controlled trial	2015	10.1017/S0007114515002810	26353786	SCOPUS, EMBASE	2
83b0fd641350...	Changes in lower extremity muscle mass and muscle strength after weight loss in obese men: A prospective study	2015	10.1016/j.orcp.2014.12.002	25892542	SCOPUS, EMBASE	2
40b07c8947e0...	Combined training enhances skeletal muscle mitochondrial oxidative capacity independent of age	2015	10.1210/jc.2014-3081	25599385	EMBASE	2
2a14f353cfa4...	Effects of a Whole body vibration (WBV) exercise intervention for institutionalized older people: A randomized, multicentre, parallel, clinical trial	2015	10.1016/j.jamda.2014.07.018	25282631	SCOPUS, EMBASE	2
095ae3bfc181...	Effects of protein supplementation in older adults undergoing resistance training: a systematic review and meta-analysis	2015	10.1007/s40279-014-0269-4	25355074	SCOPUS, EMBASE	2
61f1445e4151...	Efficacy of a simple and inexpensive exercise training program for advanced chronic obstructive pulmonary disease patients in community hospitals	2015	10.3978/j.issn.2072-1439.2015.04.13		SCOPUS, EMBASE	2
ecfdb6ca2376...	The effectiveness of a combined exercise intervention on physical fitness factors related to falls in community-dwelling older adul	2014	10.2147/CIA.S56682	24453483	SCOPUS, EMBASE	2
43c4a34ae275...	Oxidative stress responses to a graded maximal exercise test in older adults following explosive-type resistance training	2014	10.1016/j.redox.2013.12.004	25460722	SCOPUS, EMBASE	2
cd7b2228ee87...	Comprehensive approach to sarcopenia treatment	2014	10.2174/1574884708666131111192845	24219006	SCOPUS, EMBASE	2
0a89e95c812c...	Physical exercise and sarcopenia in older people: Position paper of the Italian Society of Orthopaedics and Medicine (OrtoMed)	2014	10.11138/ccmbm/2014.11.3.215		SCOPUS, EMBASE	2
4572f1c508d8...	Efficacy of a physical exercise training programme COPD in primary care: study protocol of a randomized controlled trial	2014	10.1186/1471-2458-14-788	25086593	SCOPUS, EMBASE	2
f9a314c3be62...	At cancer diagnosis: A 'window of opportunity' for behavioural change towards physical activity. A randomised feasibility study in patients with colon and breast cancer	2013	10.1136/bmjopen-2013-003556		SCOPUS, EMBASE	2
dde5c2de8a68...	Effect of strength training and short-term detraining on muscle mass in women aged over 50 years old	2013			SCOPUS, EMBASE	2
450554184e4d...	Cellulite and focused extracorporeal shockwave therapy for non-invasive body contouring: A randomized trial	2013	10.1007/s13555-013-0039-5		SCOPUS, EMBASE	2
e8a4ab08baa1...	Analysis of effectiveness of therapeutic exercise for knee osteoarthritis and possible factors affecting outcome	2013	10.1007/s00776-013-0443-9	24085378	SCOPUS, EMBASE	2
d03e9d027f87...	Progressive resistance training rebuilds lean body mass in head and neck cancer patients after radiotherapy - Results from the randomized DAHANCA 25B trial	2013	10.1016/j.radonc.2013.07.002	23932192	SCOPUS, EMBASE	2
5afb754e8f78...	Effects of fitness and vibration training on muscle quality: A 1-year postintervention follow-up in older men	2013	10.1016/j.apmr.2012.12.005	23254274	SCOPUS, EMBASE	2
58a80adee4d3...	The Effects of High-Load Strength Training With Protein- or Nonprotein-Containing Nutritional Supplementation in Patients Undergoing Dialysis	2013	10.1053/j.jrn.2012.06.007	22959782	SCOPUS, EMBASE	2
e365ad7c18c9...	Effects of core instability strength training on trunk muscle strength, spinal mobility, dynamic balance and functional mobility in older adults	2013	10.1159/000343152	23108436	SCOPUS, EMBASE	2
9824784409c9...	Changes in body fat distribution and fitness are associated with changes in hemoglobin A(1c) after 9 months of exercise training: Results from the HART-D study	2013	10.2337/dc12-2428	23670995	SCOPUS, EMBASE	2
44fa58e3c8dc...	Osteo-cise: Strong Bones for Life: Protocol for a community-based randomised controlled trial of a multi-modal exercise and osteoporosis education program for older adults at risk of falls and fractures	2012	10.1186/1471-2474-13-78	22640372	SCOPUS, EMBASE	2
0117f8216dd0...	Assessment of the effect of glucosamine sulfate and exercise on knee cartilage using magnetic resonance imaging in patients with knee osteoarthritis: A randomized controlled clinical trial	2012	10.3233/BMR-2012-0336	23220811	SCOPUS, EMBASE	2
597ef3ffa890...	Residual effects of muscle strength and muscle power training and detraining on physical function in community-dwelling prefrail older adults: a randomized controlled trial.	2012	10.1186/1471-2318-12-68	23134737	SCOPUS, EMBASE	2
324d195a72cc...	Resistance training and older adults with type 2 diabetes mellitus: Strength of the evidence	2012	10.1155/2012/284635		SCOPUS, EMBASE	2
aa2e3ff435d3...	Lower limb power rehabilitation (LLPR) using interactive video game for improvement of balance function in older people	2012	10.1016/j.archger.2012.05.012	22795360	SCOPUS, EMBASE	2
561202d185dd...	The comparison of resistance and balance exercise on balance and falls efficacy in older females	2012	10.1016/j.eurger.2011.12.002		SCOPUS, EMBASE	2
13a19d7a9deb...	Strength training increases maximum working capacity in patients with COPD - Randomized clinical trial comparing three training modalities	2012	10.1016/j.rmed.2011.11.005	22119456	SCOPUS, EMBASE	2
9281d59ba8d6...	Soy isoflavones and exercise to improve physical capacity in postmenopausal women	2012	10.3109/13697137.2011.643515	22338607	SCOPUS, EMBASE	2
22502847e198...	Effects of a weight-bearing exercise training on bone mineral density and neuromuscular function of osteopenic women	2012	10.1177/1721727X1201000318		SCOPUS, EMBASE	2
c450fab51b6a...	Effects of combined endurance and strength training on muscle strength, power and hypertrophy in 40-67-year-old men	2011	10.1111/j.1600-0838.2009.01059.x	20030775	SCOPUS, EMBASE	2
88d6453ecb3a...	Lifestyle intervention in men with advanced prostate cancer receiving androgen suppression therapy: A feasibility study	2011	10.1158/1055-9965.EPI-10-1143	21335510	SCOPUS, EMBASE	2
2abae78ec9b8...	Effects of a 1-year randomized controlled trial of resistance training on lower limb bone and muscle structure and function in older men	2010	10.1007/s00198-009-1132-6	20091404	SCOPUS, EMBASE	2
5d07cf859e98...	The effect of a training program combined with augmented afferent feedback from the feet using shoe insoles on gait performance and muscle power in older adults: a randomised controlled trial.	2010	10.3109/09638280903295441	20491152	SCOPUS, EMBASE	2
81ec347a583b...	Dose-response relationship of resistance training in older adults: A meta-analysis	2010	10.1249/MSS.0b013e3181c34465	19996996	SCOPUS, EMBASE	2
76473a0bc027...	The effects of supplementation with creatine and protein on muscle strength following a traditional resistance training program in middle-aged and older men	2010	10.1007/s12603-009-0124-8		EMBASE	2
d68681bc9ac0...	Effects of resistance training on resistin, leptin, cytokines, and muscle force in elderly post-menopausal women.	2009	10.1080/02640410903352923	19967592	SCOPUS, EMBASE	2
ade3cb613bd3...	Effects of a multi-component exercise program and calcium-vitamin-D (3)-fortified milk on bone mineral density in older men: A randomised controlled trial	2009	10.1007/s00198-008-0776-y	18958384	SCOPUS, EMBASE	2
caab08cf93e2...	Preventative effect of exercise against falls in the elderly: A randomized controlled trial	2009	10.1007/s00198-008-0794-9	19011727	SCOPUS, EMBASE	2
955481a3d3b5...	Regenerate: Assessing the feasibility of a strength-training program to enhance the physical and mental health of chronic post stroke patients with depression	2009	10.1002/gps.2082	18613281	SCOPUS, EMBASE	2
cfcac99c2a1d...	Effects of resistance training in combination with coenzyme Q10 supplementation in patients with post-polio: A pilot study	2008	10.2340/16501977-0245	18843432	SCOPUS, EMBASE	2
5c354e6c1598...	Effects of Resistance Training on Lower-Extremity Impairments in Older People With Hip Fracture	2008	10.1016/j.apmr.2008.01.026	18760151	SCOPUS, EMBASE	2
24344608b4a4...	Comparison of effect of aerobic cycle training and progressive resistance training on walking ability after stroke: A randomized sham exercise-controlled study	2008	10.1111/j.1532-5415.2008.01707.x	18422947	SCOPUS, EMBASE	2
455e27782a96...	The effect of physical training in chronic heart failure	2006	10.1016/j.ejheart.2005.05.002	16194620	SCOPUS, EMBASE	2
494f9390f989...	Power training improves balance in healthy older adults	2006	10.1093/gerona/61.1.78	16456197	SCOPUS, EMBASE	2
f7b6ee85e0dd...	Resistance training for chronic heart failure patients on beta blocker medications	2005	10.1016/j.ijcard.2004.05.061	16004896	SCOPUS, EMBASE	2
0ef56023e049...	Resistance training in the early postoperative phase reduces hospitalization and leads to muscle hypertrophy in elderly hip surgery patients - A controlled, randomized study	2004	10.1111/j.1532-5415.2004.52557.x	15571536	SCOPUS, EMBASE	2
6558aa7d8039...	The Effects of Workload Difference Between Limbs in Plyometric and Strength Exercises in Reducing Asymmetry in Change of Direction Ability During Basketball Season	2023	10.1519/JSC.0000000000004573	37747901	COCHRANE	1
6318e9bb5be9...	The effects of plyometric versus resistance training on running economy and 5-km running time in middle-aged recreational runners	2024	10.1002/ejsc.12197	39523854	COCHRANE	1
b1fd01bfa74d...	Effects of 4 Weeks of Active Exergames Training on Muscular Fitness in Elderly Women	2022	10.1519/JSC.0000000000003560	32483059	COCHRANE	1
d14cbc6f3bf7...	The Effects of Combined Balance and Complex Training Versus Complex Training Only on Measures of Physical Fitness in Young Female Handball Players	2021	10.1123/ijspp.2020-0765	33735832	WEB_OF_SCIENCE, COCHRANE	2
f68ae2af69ff...	Distinct effects of trampoline-based stretch-shortening cycle exercises on muscle strength and postural control in children with Down syndrome: a randomized controlled study	2022	10.26355/eurrev_202203_28343	35363345	COCHRANE	1
81f236da2c3c...	Effect of Plyometric Exercises of Lower Limb on Strength, Postural Control, and Risk of Falling in Stroke Patients	2025	10.3390/medicina61020223	40005340	COCHRANE	1
48a8df04bb58...	Effects of Combined Surfaces vs. Single-Surface Plyometric Training on Soccer Players' Physical Fitness	2020	10.1519/JSC.0000000000002929	30664111	WEB_OF_SCIENCE, COCHRANE	2
584b69e038d4...	Effects of kinesthesia and balance exercises in knee osteoarthritis	2005	10.1097/01.rhu.0000191213.37853.3d	16371799	COCHRANE	1
f70d513497cf...	Acute effects of maximal versus submaximal hurdle jump exercises on measures of balance, reactive strength, vertical jump performance and leg stiffness in youth volleyball players	2022	10.3389/fphys.2022.984947		WEB_OF_SCIENCE, COCHRANE	2
7e14ededb198...	Effects of plyometric training followed by a reduced training programme on physical performance in prepubescent soccer players	2001		11533565	WEB_OF_SCIENCE, COCHRANE	2
2f6b17611dad...	The effect of 10-week plyometric training program on muscle strength of the upper and lower limbs, lean body mass, and insulin-like growth factor 1 in young women	2017	10.22038/IJOGI.2017.10159		COCHRANE	1
ac82edf23e24...	Sequencing Effects of Concurrent Strength and Endurance Training on Selected Measures of Physical Fitness in Young Male Soccer Players: a Randomized Matched-Pairs Trial	2024	10.1186/s40798-024-00726-4	38782805	COCHRANE	1
771432d9d047...	Comparison of Neuromuscular and Aquatic Exercise Programs on Fall Risk and Physical Function in Geriatrics	2024			COCHRANE	1
1dd0437fa5da...	Effects of Plyometric Jump Training on the Reactive Strength Index in Healthy Individuals Across the Lifespan: A Systematic Review with Meta-analysis	2023	10.1007/s40279-023-01825-0	36906633	WEB_OF_SCIENCE	1
c9c4149bb864...	Effectiveness of Resistance and Jump Training or Machine-based Isometric Training for Middle-aged and Older Men with Osteopenia and Osteoporosis: LIFTMOR for Men Trial Preliminary Findings	2019			WEB_OF_SCIENCE	1
66e3e62baf33...	Combination of Agility and Plyometric Training Provides Similar Training Benefits as Combined Balance and Plyometric Training in Young Soccer Players	2018	10.3389/fphys.2018.01611	30483158	WEB_OF_SCIENCE	1
c359cb832927...	Unveiling the benefits of stretch-shortening cycle exercise for children with obstetric brachial plexus injury: a clinical trial assessing muscle strength, bone mineral density, and functional capacity	2025	10.23736/S1973-9087.24.08548-4	39589157	WEB_OF_SCIENCE	1
b95819f2d102...	Effects of exercise intensity on nutritional status, body composition, and energy balance in patients with COPD: a randomized controlled trial	2025	10.1186/s12890-024-03448-1	39856592	SCOPUS, EMBASE	2
fc2efb85477e...	Clinical outcomes of asynchronous telerehabilitation through a mobile app are equivalent to synchronous telerehabilitation in patients with fibromyalgia: a randomized control study	2025	10.1186/s12891-025-08377-6	39905353	SCOPUS, EMBASE	2
f74836a5c001...	Efficacy of structured exercise and oat supplementation for treating non-alcoholic fatty liver disease: protocol of a randomized controlled trial	2025	10.1186/s12937-025-01128-2	40287684	SCOPUS, EMBASE	2
8c34870760a3...	Effectiveness of prior intra-articular corticosteroid injection in elderly patients with knee osteoarthritis undergoing progressive resistance training: a randomized controlled trial	2025	10.1186/s42358-025-00452-9	40296068	SCOPUS, EMBASE	2
2613aa60c85a...	Comparative effectiveness of different dual task mode interventions on cognitive function in older adults with mild cognitive impairment or dementia: a systematic review and network meta-analysis	2025	10.1007/s40520-025-03016-5	40304821	SCOPUS, EMBASE	2
78f2e0540ec7...	Examining how resistance training affects bone strength in older adults with rheumatic diseases: a systematic review	2025	10.1186/s41927-025-00531-w		SCOPUS, EMBASE	2
d7fc9b5ab324...	Effect of low-intensity resistance training at different levels of blood flow restriction on pain, proprioception and muscle strength in patients with knee osteoarthritis: a randomized controlled trial	2025	10.1186/s12891-025-09051-7	40781308	SCOPUS, EMBASE	2
b82cde67d719...	Effects of milk fat globule membrane ingestion with exercise on physical strength in healthy young adults: a randomized double-blind, placebo-controlled trial	2025	10.1080/15502783.2025.2535372	40684312	SCOPUS, EMBASE	2
d5ad851014d5...	Enhancing Muscle Quality: Exploring Leucine and Whey Protein in Sarcopenic Individuals	2025	10.1002/jcsm.70060	40937507	SCOPUS, EMBASE	2
831912dc5d28...	Safety of strength training with blood flow restriction in patients with hemophilic arthropathy; a randomized pilot study	2025	10.1080/09593985.2025.2497964	40277333	SCOPUS, EMBASE	2
09d33f81da57...	Intensity-dependent transcranial direct current stimulation effects on lower limb strength: optimizing acute and prolonged gains in explosive force and maximal strength	2025	10.1016/j.neuroscience.2025.08.002	40774619	SCOPUS, EMBASE	2
eecd0969bf3a...	Expiratory Muscle Strength Training to Improve Voice and Respiratory Outcomes After Laryngectomy: A Feasibility Study	2025	10.1111/1460-6984.70107	40817430	SCOPUS, EMBASE	2
590eb3411078...	Effects of vitamins C and e supplementation combined with 12-week resistance training in older women with sarcopenia: A randomized, double-blind, placebo-controlled trial	2025	10.1097/MD.0000000000043976	40859523	SCOPUS, EMBASE	2
8f3468bfbf30...	Efficacy of progressive resistance training intensities and adequate dietary protein intake for community-dwelling frail older adults (TEAMS study), protocol for a randomised controlled trial	2025	10.1186/s12877-025-06209-9	40783689	SCOPUS, EMBASE	2
ced686ec8094...	Vitamin D and Sarcopenia: Implications for Muscle Health	2025	10.3390/biomedicines13081863		SCOPUS, EMBASE	2
ab1e9b53e166...	Effect of Pelvic Floor Muscle Training Combined with Electrical Stimulation Therapy on Stress Urinary Incontinence: A Meta-Analysis	2025	10.1159/000543133	39778553	SCOPUS, EMBASE	2
f198727c86cc...	Effects of Kinesio taping and extracorporeal shock wave therapy in combination with exercise in sarcopenic older adults: a study protocol of a double-blinded, randomized controlled trial	2025	10.1186/s12877-025-06251-7	40739188	SCOPUS, EMBASE	2
aef6bc159e43...	Effectiveness of an mHealth-based impact exercise program for bone health in postmenopausal women: a randomised controlled trial protocol	2025	10.1186/s12889-025-22576-9	40640761	SCOPUS, EMBASE	2
f3b1909b62e7...	Impact of prior arthroscopic rotator cuff repair on postoperative outcomes of reverse shoulder arthroplasty: a comparative analysis of muscle strength recovery and clinical results	2025	10.1016/j.jseint.2025.04.021		SCOPUS, EMBASE	2
a26b7e65979f...	The effects of low-load resistance training combined with blood flow restriction on knee rehabilitation in middle-aged and elderly patients: A systematic review and meta-analysis	2025	10.1371/journal.pone.0323388	40455786	SCOPUS, EMBASE	2
5be96c72e8ef...	Feasibility and effectiveness of physical exercise for older adults delivered remotely via videoconferencing-systematic review and meta analysis	2025	10.1093/ageing/afaf171	40552370	SCOPUS, EMBASE	2
b5160c53a95e...	Is Exercise During Androgen Deprivation Therapy Effective and Safe? A Randomized Controlled Trial	2025	10.1111/sms.70084	40481694	SCOPUS, EMBASE	2
29f5ac87c7c1...	The effect of muscles in the treatment of lower limb lymphedema: respiratory muscles or leg muscles?	2025	10.1007/s00520-025-09436-3	40214771	SCOPUS, EMBASE	2
ea707b26eacb...	Effects of resistance training vs high intensity interval training on body composition, muscle strength, cardiorespiratory fitness, and quality of life in survivors of breast cancer: a randomized trial	2025	10.1007/s10549-024-07559-5	39557768	SCOPUS, EMBASE	2
16962098d490...	Quercetin ingestion alters motor unit behavior and enhances improvement in muscle strength following resistance training in older adults: a randomized, double-blind, controlled trial	2025	10.1007/s00394-025-03634-9	40063125	SCOPUS, EMBASE	2
6ea5e890b618...	Nutritional intake as a determinant of high-speed resistance and multicomponent training efficacy on strength in older women at risk of sarcopenia. A randomized clinical trial	2025	10.1016/j.clnu.2025.02.015	39999641	SCOPUS, EMBASE	2
f61cfbca1c23...	Feasibility and effects of remotely supervised aerobic training and resistance training in older adults with mild cognitive impairment: A pilot three-arm randomised controlled trial	2025	10.1136/gpsych-2024-101858		SCOPUS, EMBASE	2
9b0511572852...	Preventive effects of progressive resistance training of different intensities on breast cancer–related lymphedema	2025	10.1007/s00520-025-09256-5	39953154	SCOPUS, EMBASE	2
254e42bf0d38...	Comparison of the Effectiveness of Protein Supplementation Combined with Resistance Training on Body Composition and Physical Function in Healthy Elderly Adults	2025	10.1016/j.tjnut.2025.01.017	39889852	SCOPUS, EMBASE	2
9a0a6ae8fe4b...	Effects of 12-week whole-body vibration training versus resistance training in older people with sarcopenia	2025	10.1038/s41598-025-91644-2	40011687	SCOPUS, EMBASE	2
f5a2e5a0a998...	Impact of resistance training and chicken intake on vascular and muscle health in elderly women	2025	10.1002/jcsm.13572	39569460	SCOPUS, EMBASE	2
0e7474be0955...	Effects of a Hypocaloric Diet Plus Resistance Training with and Without Amino Acids in Older Participants with Dynapenic Obesity: A Randomized Clinical Trial	2025	10.3390/nu17030418	39940276	SCOPUS, EMBASE	2
6061515b0d1c...	Hämatrain-Hybrid movement therapy during inpatient and outpatient hematological treatment: correlations with physical and psychological parameters	2025	10.1007/s00520-025-09148-8	39805997	SCOPUS, EMBASE	2
897ba7f76c45...	Effects of preoperative beta-hydroxy-beta-methylbutyrate, arginine, and glutamine supplementation on cardiac surgery: A randomized controlled trial	2025	10.1016/j.clnu.2024.12.030	39765161	SCOPUS, EMBASE	2
fb14f8437b5e...	A meta-analysis of randomized controlled trials: evaluating the efficacy of isokinetic muscle strengthening training in improving knee osteoarthritis outcomes	2025	10.1186/s13018-025-05495-8	39856723	SCOPUS, EMBASE	2
ed8ebdc7dd05...	Chang Gung Memorial Hospital At Linkou	2025			EMBASE	2
631dd056c114...	Arthroscopic partial meniscectomy versus exercise therapy for degenerative meniscal tears: 10-year follow-up of the OMEX randomised controlled trial	2025	10.1136/bjsports-2024-108644	39326908	SCOPUS, EMBASE	2
dd88f68391b9...	Effect of Combined Exercise and Nutrition Interventions During Inpatient Chemotherapy in Acute Leukemia and Malignant Lymphoma Patients: A Randomized Controlled Trial	2025	10.1080/01635581.2024.2406043	39300733	SCOPUS, EMBASE	2
9bba4c904bc4...	Size and site matter: the influence of corpus callosum subregional lesions on the magnitude of cross-education of strength	2025	10.3389/fphys.2025.1554742		SCOPUS, EMBASE	2
2a80ac09d24c...	Effectiveness of non-pharmacological therapies for preventing frailty in older people: An umbrella review	2025	10.1016/j.archger.2024.105628	39303421	SCOPUS, EMBASE	2
b4184ef2675f...	The impact of different pulmonary rehabilitation approaches on fibrotic interstitial lung disease: a comparative randomized trial	2025	10.1080/17476348.2025.2513512	40440705	SCOPUS, EMBASE	2
e2a88eefe936...	Feasibility and preliminary efficacy of an online home-based functional exercise program for Parkinson's disease: a pilot study	2025	10.3389/fneur.2025.1591330		SCOPUS, EMBASE	2
35647e098df9...	Optimal dose of resistance training to improve handgrip strength in older adults with sarcopenia: a systematic review and Bayesian model-based network meta-analysis	2025	10.3389/fphys.2025.1564988		SCOPUS, EMBASE	2
dfa71812c1ea...	Effect of power training on function and body composition in older women with probable sarcopenia. A study protocol for a randomized controlled trial	2025	10.1371/journal.pone.0313072	39761305	SCOPUS, EMBASE	2
9522694b8501...	Dynamic Muscle Power Training with Elastic Bands Improve Lower Extremity Function and Balance in Older Chronic Stroke Survivors?	2025	10.1097/TGR.0000000000000443		SCOPUS, EMBASE	2
ed349338cafc...	Effect of hypoxia conditioning on physical fitness in middle-aged and older adults—a systematic review and meta-analysis	2025	10.7717/peerj.19348		SCOPUS, EMBASE	2
9e9978e9998b...	Effectiveness of high-frequency repetitive transcranial magnetic stimulation combined with quadriceps strength training in the treatment of knee osteoarthritis: a randomized controlled trial	2025	10.1177/1759720X251370979		SCOPUS, EMBASE	2
58500264855d...	Effect of high voltage electrical stimulation in temporomandibular disorders: a randomized controlled trial	2025	10.1080/09593985.2024.2321215	38407175	SCOPUS, EMBASE	2
8c916b1c7d22...	Effects of Resistance Training Volume on Physical Function, Lean Body Mass and Lower-Body Muscle Hypertrophy and Strength in Older Adults: A Systematic Review and Network Meta-analysis of 151 Randomised Trials	2025	10.1007/s40279-024-02123-z	39405023	SCOPUS, EMBASE	2
70b80fc4286d...	A 24-Week Combined Resistance and Balance Training Program Improves Physical Function in Older Adults: A Randomized Controlled Trial	2025	10.1519/JSC.0000000000004941	39652737	SCOPUS, EMBASE	2
c154a06cb07f...	The impact of core training combined with breathing exercises on individuals with chronic non-specific low back pain	2025	10.3389/fpubh.2025.1518612	40061473	SCOPUS, EMBASE	2
2c7c1b291254...	Short-term resistance training enhances functional and physiological markers in older women: implications for biomechanical and health interventions in aging	2025	10.3389/fpubh.2025.1630525	40791617	SCOPUS, EMBASE	2
8af779954ef1...	Exercises and Brain Stimulation to Preserve Function in Amyotrophic Lateral Sclerosis A Systematic Review and Meta-Analysis	2024	10.1212/CPJ.0000000000200408		SCOPUS, EMBASE	2
f329fbd5c127...	High-intensity interval training improves cardiovascular and physical health in patients with rheumatoid arthritis: a multicentre randomised controlled trial	2024	10.1136/bjsports-2024-108369	39179363	SCOPUS, EMBASE	2
926ce4431450...	The physiological and physical benefits of two types of concurrent training: a randomized controlled trial	2024	10.1186/s13102-023-00798-x		SCOPUS, EMBASE	2
8ba6cc2e3295...	Effects of HIIT training and HIIT combined with circuit resistance training on measures of physical fitness, miRNA expression, and metabolic risk factors in overweight/obese middle-aged women	2024	10.1186/s13102-024-00904-7		SCOPUS, EMBASE	2
6e0d1cd21626...	The association between maximal muscle strength, disease severity and psychopharmacotherapy among young to middle-aged inpatients with affective disorders – a prospective pilot study	2024	10.1186/s12888-024-05849-2	38811916	SCOPUS, EMBASE	2
664cb313d590...	Intermittent blood flow restriction with low-load resistance training for older adults with knee osteoarthritis: a randomized, controlled, non-inferiority trial protocol	2024	10.1186/s13063-024-08203-9	38822360	SCOPUS, EMBASE	2
bc3f6cd0c4a1...	The impact of exercise on growth factors in postmenopausal women: a systematic review and meta-analysis	2024	10.1186/s12905-024-03240-7	38987734	SCOPUS, EMBASE	2
e868485955ab...	The relationship between sarcopenia and related bioindicators and changes after intensive lifestyle intervention in elderly East-China populations	2024	10.1186/s12891-024-07835-x	39227842	SCOPUS, EMBASE	2
b33971a07087...	Does high-frequency resistance exercise offer additional benefits to older adults? learnings from a randomized controlled trial	2024	10.1186/s13102-024-00975-6		SCOPUS, EMBASE	2
55b1628e46b7...	The impact of expiratory muscle strength training on voluntary cough effectiveness in Huntington's disease	2024	10.1111/ene.16500	39344651	SCOPUS, EMBASE	2
703d148e389a...	A single-center, double-blind, randomized, placebo-controlled, two-arm study to evaluate the safety and efficacy of once-weekly sirolimus (rapamycin) on muscle strength and endurance in older adults following a 13-week exercise program	2024	10.1186/s13063-024-08490-2	39354527	SCOPUS, EMBASE	2
02f2f217f228...	The effect of Sarcomeal® oral supplementation plus vitamin D3 on muscle parameters and metabolic factors in diabetic sarcopenia patients: study protocol of a randomized controlled clinical trial	2024	10.1186/s13063-024-08700-x	39716287	SCOPUS, EMBASE	2
af76f2b079fd...	Feasibility and effectiveness of a 6-month, home-based, resistance exercise delivered by a remote technological solution in healthy older adults	2024	10.1016/j.archger.2024.105559	39018967	SCOPUS, EMBASE	2
20035bbc118e...	Associations between changes in leg extensor muscle power and physical function after supervised exercise in patients with hip osteoarthritis. Secondary analysis from the hip booster trial	2024	10.1016/j.ocarto.2024.100523		SCOPUS, EMBASE	2
ad58eaa0e2b4...	The effect of resistance training on patients with secondary sarcopenia: a systematic review and meta-analysis	2024	10.1038/s41598-024-79958-z	39567607	SCOPUS, EMBASE	2
784aafa3ec79...	A staged use of tourniquet does not influence the fast-track recovery after total knee arthroplasty: a prospective randomized study	2024	10.1007/s00402-024-05300-x	38568385	SCOPUS, EMBASE	2
c02eb850070c...	Effects of Creatine Supplementation and Resistance Training on Muscle Strength Gains in Adults <50 Years of Age: A Systematic Review and Meta-Analysis	2024	10.3390/nu16213665	39519498	SCOPUS, EMBASE	2
bd33693f3ec9...	Enhanced diaphragm excursion and exercise tolerance in COPD patients through inspiratory muscle training after standardised pulmonary rehabilitation: randomised controlled trial	2024	10.1183/23120541.00035-2024		SCOPUS, EMBASE	2
ab9160e5506a...	Possible Interaction Between Physical Exercise and Leptin and Ghrelin Changes Following Roux-en-Y Gastric Bypass in Sarcopenic Obesity Patients—A Pilot Study	2024	10.3390/nu16223913	39599699	SCOPUS, EMBASE	2
652a76f61a69...	Effect of home-based tongue-strengthening exercise using a portable tool on oropharyngeal muscles in older adults with sarcopenic dysphagia: A randomised controlled study	2024	10.1111/joor.13818	39073062	SCOPUS, EMBASE	2
8a684b26aa41...	Effects of over 10 weeks of resistance training on muscle and bone mineral density in older people with sarcopenia over 70 years old: A systematic review and meta-analysis of randomized controlled trials	2024	10.1016/j.gerinurse.2024.09.016	39368450	SCOPUS, EMBASE	2
e485436def22...	mHealth-assisted expiratory muscle strength training in Parkinson's disease patients: A proof-of-concept study	2024	10.1177/1877718X241296013	39957190	SCOPUS, EMBASE	2
365bef8f7bf7...	Comparative effects of cognitive and instability resistance training versus instability resistance training on balance and cognition in elderly women	2024	10.1038/s41598-024-77536-x	39472492	SCOPUS, EMBASE	2
d6afc685218e...	Tele-rehabilitation in COVID-19 survivors (TERCOV): An investigator-initiated, prospective, multi-center, real-world study	2024	10.1002/pri.2137	39425529	SCOPUS, EMBASE	2
01ac3a5aaa4c...	Beneficial effects of exercise, testosterone, vitamin D, calcium and protein in older men—A randomized clinical trial	2024	10.1002/jcsm.13498	38890228	SCOPUS, EMBASE	2
a9f1c3d9d439...	Effects of resistance exercise and whey protein supplementation on cognitive function in older men: secondary analysis of a randomised, double-blind, placebo-controlled trial	2024	10.1016/j.exger.2024.112477	38844183	SCOPUS, EMBASE	2
220be12871bc...	Effect of expiratory muscle strength training on voice and speech: An exploratory study in persons with Parkinson's disease or multiple sclerosis	2024	10.1080/17549507.2023.2243402	37787640	SCOPUS, EMBASE	2
481d011b01ae...	Slow-velocity eccentric-only resistance training improves symptoms of type 2 diabetic mellitus patients by regulating plasma MMP-2 and-9	2024	10.1097/MD.0000000000038855	39029066	SCOPUS, EMBASE	2
b4210cd36e6f...	Long-Term Effects of a 6-Week Power-Based Resistance Training and Fast Walking Interval Training Program on Physical Function, Muscle Power, Disability, and Frailty in Pre-Frail and Frail Older Adults	2024	10.1159/000536363	38574485	SCOPUS, EMBASE	2
1ec89b262577...	Heavy resistance training at retirement age induces 4-year lasting beneficial effects in muscle strength: A long-term follow-up of an RCT	2024	10.1136/bmjsem-2024-001899		SCOPUS, EMBASE	2
80bf8c8738aa...	Impact of resistance exercise program on muscle strength, cardiopulmonary function and glycolipid metabolism of bedridden population aged 80 years and above A randomized controlled trial	2024	10.1097/MD.0000000000038412	38875406	SCOPUS, EMBASE	2
d80099cc6536...	Effect of resistance training and chicken meat on muscle strength and mass and the gut microbiome of older women: A randomized controlled trial	2024	10.14814/phy2.16100	38888088	SCOPUS, EMBASE	2
8b23cae02219...	The impact of inertial exercises performed in the workplace on shoulder muscles' strength and muscles' fatigue resistance in women with disabilities	2024	10.13075/mp.5893.01503	38529799	SCOPUS, EMBASE	2
5c504ed0e1a2...	Combining functional exercises with exercise training in COPD: a randomized controlled trial	2024	10.1080/09593985.2022.2148146	36457177	SCOPUS, EMBASE	2
530188e86ca8...	Effect of lower-extremity muscle power training on muscle strength, balance function and walking ability in older adults with heart failure: a randomized controlled trial	2024	10.1007/s41999-023-00905-8	38147270	SCOPUS, EMBASE	2
253d8c5b5850...	Feasibility of Combining Functional Mobilisation with Resistance and Endurance Training for Mechanically Ventilated Patients in Intensive Care Unit Setting—A Pilot Study	2024	10.3390/jcm13082412		SCOPUS, EMBASE	2
26193f21e582...	Effects of oral oligopeptide preparation and exercise intervention in older people with sarcopenia: a randomized controlled trial	2024	10.1186/s12877-024-04860-2	38500043	SCOPUS, EMBASE	2
6bfe2651098f...	Is Resistance Training an Option to Improve Functionality and Muscle Strength in Middle-Aged People with Multiple Sclerosis? A Systematic Review and Meta-Analysis	2024	10.3390/jcm13051378		SCOPUS, EMBASE	2
6a71b1f43d67...	Evaluating the Effects of an Enhanced Strength Training Program in Remote Cardiological Rehabilitation: A Shift from Aerobic Dominance—A Pilot Randomized Controlled Trial	2024	10.3390/jcm13051445		SCOPUS, EMBASE	2
8e9accb9527b...	Long-chain n -3 polyunsaturated fatty acids for the management of age- and disease-related declines in skeletal muscle mass, strength and physical function	2024	10.1097/MCO.0000000000000986	37874045	SCOPUS, EMBASE	2
77f7c73f4832...	Improvement of muscle quality assessed using the phase angle is influenced by recovery of knee extension strength in patients with hip fractures	2024	10.1016/j.clnu.2024.02.003	38335802	SCOPUS, EMBASE	2
1f065dc416a3...	Responsiveness of respiratory function in Parkinson’s Disease to an integrative exercise programme: A prospective cohort study	2024	10.1371/journal.pone.0301433	38551984	SCOPUS, EMBASE	2
79f6b5180e21...	Functional mobility and physical fitness are improved through a multicomponent training program in institutionalized older adults	2024	10.1007/s11357-023-00877-4	37493861	SCOPUS, EMBASE	2
d53df19afcc6...	Effects of aerobic and combined aerobic-resistance exercise on motor function in sedentary older adults: A randomized clinical trial	2024	10.3233/BMR-220414	37661865	SCOPUS, EMBASE	2
4efda19f8cf4...	Eccentric and Concentric Strength Training in Patients with Knee Osteoarthritis: A Systematic Review	2024	10.1615/CritRevPhysRehabilMed.2023050048		SCOPUS, EMBASE	2
c0304adcea12...	Implementation of Pelvic Floor Muscle Strength Training in Women With Stress Urinary Incontinence	2024			SCOPUS, EMBASE	2
accf78259512...	Pre-operative gluteus medius tendon degeneration and its impact on strength and functional ability one year after total hip replacement	2024	10.1080/07853890.2024.2388701	39140369	SCOPUS, EMBASE	2
7b326af53928...	The Efficacy of Whole-Body Vibration in Managing Postburn Victims' Complications: A Systematic Review	2024	10.1093/jbcr/irad151	37791999	SCOPUS, EMBASE	2
620c09394837...	Effects of Ashwagandha (Withania somnifera) standardized root extract on physical endurance and VO (2max) in healthy adults performing resistance training: An eight-week, prospective, randomized, double-blind, placebo-controlled study	2024	10.12688/f1000research.130932.2	38988644	SCOPUS, EMBASE	2
dbe6e9037028...	The effectiveness of protein supplementation combined with resistance exercise programs among community-dwelling older adults with sarcopenia: a systematic review and meta-analysis	2024	10.4178/epih.e2024030	38374703	SCOPUS, EMBASE	2
6364c10cdd1e...	Does inflammation markers or treatment type moderate exercise intensity effects on changes in muscle strength in cancer survivors participating in a 6-month combined resistance- and endurance exercise program? Results from the Phys-Can trial	2023	10.1186/s13102-023-00617-3		SCOPUS, EMBASE	2
f75c359fa1e6...	Effects of Physical Activity Interventions on Strength, Balance and Falls in Middle-Aged Adults: A Systematic Review and Meta-Analysis	2023	10.1186/s40798-023-00606-3		SCOPUS, EMBASE	2
8f9ffd5cd9d7...	Effects of a multilevel intervention of resistance training with or without beta-hydroxy-beta-methylbutyrate in medical ICU patients during entire hospitalisation: a four-arm multicentre randomised controlled trial	2023	10.1186/s13054-023-04698-x	38102705	SCOPUS, EMBASE	2
c55a129e1a86...	Effect of home-based prehabilitation on postoperative complications after surgery for gastric cancer: randomized clinical trial	2023	10.1093/bjs/znad312	37750588	SCOPUS, EMBASE	2
8d7bffda997a...	Shoulder vibratory exercises improves shoulder external rotation muscle strength and shoulder function: Randomized comparison trial	2023	10.3233/BMR-220190	37458007	SCOPUS, EMBASE	2
b7cbd0da7be1...	Effects of perioperative exercise therapy combined with nutritional supplementation on functional recovery after fast-track total hip arthroplasty	2023	10.1016/j.jos.2022.09.012	36272926	SCOPUS, EMBASE	2
7fb9762146a0...	Impact of 14 Days of Bed Rest in Older Adults and an Exercise Countermeasure on Body Composition, Muscle Strength, and Cardiovascular Function: Canadian Space Agency Standard Measures	2023	10.1159/000534063	37717560	SCOPUS, EMBASE	2
0c2fc8b804db...	Omega-3 polyunsaturated fatty acids in sarcopenia management: A network meta-analysis of randomized controlled trials	2023	10.1016/j.arr.2023.102014	37442370	SCOPUS, EMBASE	2
2bc1d9cb59df...	Muscular Adaptations to Concurrent Resistance Training and High-Intensity Interval Training in Adults with Type 2 Diabetes: A Pilot Study	2023	10.3390/ijerph20186746	37754606	SCOPUS, EMBASE	2
631584c841bf...	Adding Non-Invasive Positive Pressure Ventilation to Supplemental Oxygen During Exercise Training in Severe Chronic Obstructive Pulmonary Disease: A Randomized Controlled Study	2023	10.5152/ThoracResPract.2023.23040		SCOPUS, EMBASE	2
6c8fc55ec83e...	Combined exercise and nutritional intervention for sarcopenia and frailty	2023	10.1159/000530786		EMBASE	2
1f11812589ed...	The efficacy of different interventions in the treatment of sarcopenia in middle-aged and elderly people: A network meta-analysis	2023	10.1097/MD.0000000000034254	37417618	SCOPUS, EMBASE	2
c29130bdc442...	Exploring the modification factors of exercise therapy on biomechanical load in patients with knee osteoarthritis: a systematic review and meta-analysis	2023	10.1007/s10067-023-06553-4	36879173	SCOPUS, EMBASE	2
69fe2a000cfd...	Exercise for sarcopenia in older people: A systematic review and network meta-analysis	2023	10.1002/jcsm.13225	37057640	SCOPUS, EMBASE	2
ae30eaf6c4d8...	Interval walking training in type 2 diabetes: A pilot study to evaluate the applicability as exercise therapy	2023	10.1371/journal.pone.0285762	37200321	SCOPUS, EMBASE	2
6092363c63a3...	Process evaluation of elastic resistance band training to benefit vertebral fracture risk in postmenopausal women	2023			EMBASE	2
211b3b57f93b...	Effects of blood flow restriction training on muscle strength, muscle mass and physical performance in older adults: a Meta-analysis	2023	10.12307/2023.097		SCOPUS, EMBASE	2
d3872c55c4e1...	The Effect of Low Intensity Resistance Training with Blood Flow Restriction on Fall Resistance in Middle-Aged and Older Adults: A Meta-Analysis	2023	10.3390/ijerph20064723	36981632	SCOPUS, EMBASE	2
d2392420770d...	Chronic Effects of Static Stretching Exercises on Muscle Strength and Power in Healthy Individuals Across the Lifespan: A Systematic Review with Multi-level Meta-analysis	2023	10.1007/s40279-022-01806-9	36719536	SCOPUS, EMBASE	2
eb2e34a6892f...	Protocol for a randomised, placebo-controlled, double-blinded clinical trial on the effect of oestrogen replacement on physical performance to muscle resistance exercise for older women with osteoarthritis of knee joint: the EPOK trial	2023	10.1186/s12877-023-03828-y	36800940	SCOPUS, EMBASE	2
90af250ee6bc...	Design and application of personalized exercise prescription for primary osteoporosis	2023	10.1097/MD.0000000000032857	36800636	SCOPUS, EMBASE	2
5e77ff878569...	Resistance training of peripheral muscles benefits respiratory parameters in older women with sarcopenia: Randomized controlled trial	2023	10.1016/j.archger.2022.104799	36070636	SCOPUS, EMBASE	2
05e27b0b15d6...	Combined L-Citrulline Supplementation and Slow Velocity Low-Intensity Resistance Training Improves Leg Endothelial Function, Lean Mass, and Strength in Hypertensive Postmenopausal Women	2023	10.3390/nu15010074	36615732	SCOPUS, EMBASE	2
e2e40c24bb98...	Effect of Electrical Muscle Stimulation and Resistance Exercise Intervention on Physical and Brain Function in Middle-Aged and Older Women	2023	10.3390/ijerph20010101	36612423	SCOPUS, EMBASE	2
2d427fcaf61a...	Does the Addition of Strength Training to a High-Intensity Interval Training Program Benefit More the Patients with Chronic Heart Failure?	2023	10.31083/j.rcm2401029		SCOPUS, EMBASE	2
fb887460a3c5...	Pharmacokinetics and effect of maslinic acid with physical exercise on grip strength and trunk muscle mass in healthy Japanese individuals	2023	10.3164/JCBN.23-5		SCOPUS, EMBASE	2
711a90282f13...	The role of resistance training and creatine supplementation on oxidative stress, antioxidant defense, muscle strength, and quality of life in older adults	2023	10.3389/fpubh.2023.1062832	37206869	SCOPUS, EMBASE	2
8878707e6244...	Effects of low-intensity resistance exercise with blood flow restriction after high tibial osteotomy in middle-aged women	2022	10.1097/MD.0000000000032294	36595769	SCOPUS, EMBASE	2
94a268675dcf...	The chronic effects of eccentric exercise interventions in different populations: An umbrella review	2022	10.4081/ejtm.2022.10876		SCOPUS, EMBASE	2
1ef83258ab3f...	Using exergame-based exercise to prevent and postpone the loss of muscle mass, muscle strength, cognition, and functional performance among elders in rural long-term care facilities: A protocol for a randomized controlled trial	2022	10.3389/fmed.2022.1071409		SCOPUS, EMBASE	2
b9018ea56834...	Effect of resistance exercise on serum leptin levels in a prospective longitudinal study of women patients with rheumatoid arthritis	2022	10.1186/s13075-022-02765-2	35346353	SCOPUS, EMBASE	2
8664303bd43d...	Fish oil administration combined with resistance exercise training improves strength, resting metabolic rate, and inflammation in older adults	2022	10.1007/s40520-022-02250-5	36136236	SCOPUS, EMBASE	2
e06dba2511ea...	Effects of Twenty-Four Weeks of Resistance Exercise Training on Body Composition, Bone Mineral Density, Functional Fitness and Isokinetic Muscle Strength in Obese Older Women: A Randomized Controlled Trial	2022	10.3390/ijerph192114554	36361434	SCOPUS, EMBASE	2
807940d5c6c4...	The effects of elastic band exercise on the pain, kinesiophobia, functional, and psychological status after total knee arthroplasty: a randomized controlled trial	2022	10.1007/s10067-022-06266-0	35776283	SCOPUS, EMBASE	2
d72b92dad42f...	Effect of Whey Protein Supplementation in Postmenopausal Women: A Systematic Review and Meta-Analysis	2022	10.3390/nu14194210	36235862	SCOPUS, EMBASE	2
0b16a6b98f39...	Effect Of Exercise on Muscle Mass, Fat Mass, Bone Mass, Muscular Strength and Physical Performance in Community Dwelling Older Adults: Systematic Review and Meta-Analysis	2022	10.14336/AD.2022.0215		SCOPUS, EMBASE	2
5c2fa29e2930...	Effectiveness of Blood Flow Restriction Training on Muscle Strength and Physical Performance in Older Adults: A Systematic Review and Meta-analysis	2022	10.1016/j.apmr.2021.12.015	35026149	SCOPUS, EMBASE	2
f7d9ae837e18...	Effect of a home-based resistance exercise program in elderly participants with osteoporosis: a randomized controlled trial	2022	10.1007/s00198-022-06456-1	35704055	SCOPUS, EMBASE	2
76bbfda293ef...	The Effects of Low-intensity Resistance Training with Blood Flow Restriction Versus Traditional Resistance Exercise on Lower Extremity Muscle Strength, Walking Capacity, and Balance in Ischemic Stroke Survivors: A Study Protocol for the BFR-Stroke RESILIENCE Trial	2022	10.4274/haseki.galenos.2022.8361		SCOPUS, EMBASE	2
f8cb3b96df80...	Effects of strength exercises combined with other training on physical performance in frail older adults: A systematic review and meta-analysis	2022	10.1016/j.archger.2022.104757	35777245	SCOPUS, EMBASE	2
88a84052aaa7...	Effects of Carbohydrate and Protein Administration by Food Items on Strength Response after Training in Stable COPD	2022	10.3390/nu14173565	36079823	SCOPUS, EMBASE	2
4b5f83ad9f67...	Effects of vibration training vs. conventional resistance training among community-dwelling older people with sarcopenia: three-arm randomized controlled trial protocol	2022	10.3389/fnagi.2022.905460		SCOPUS, EMBASE	2
d3937eefa619...	Benefits of Pulmonary Rehabilitation in Patients with Idiopathic Pulmonary Fibrosis Receiving Antifibrotic Drug Treatment	2022	10.3390/jcm11185336		SCOPUS, EMBASE	2
d31a1f763cc7...	Center-Based vs Home-Based Geriatric Rehabilitation on Sarcopenia Components: A Systematic Review and Meta-analysis	2022	10.1016/j.apmr.2021.12.016	35026150	SCOPUS, EMBASE	2
a76a08aa8d8d...	Exercise Intervention as a Therapy in Patients with Diabetes Mellitus and Sarcopenia: A Meta-Analysis	2022	10.1007/s13300-022-01275-3		SCOPUS, EMBASE	2
38f6a3fd9dfe...	Effects of gravitational versus iso-inertial resistance training on leg muscle force and metabolic cost of walking in healthy older adults	2022	10.23736/S0022-4707.21.12649-0	34498822	SCOPUS, EMBASE	2
809bd4100cee...	Effectiveness of Using Virtual Reality–Supported Exercise Therapy for Upper Extremity Motor Rehabilitation in Patients with Stroke: Systematic Review and Meta-analysis of Randomized Controlled Trials	2022	10.2196/24111	35723907	SCOPUS, EMBASE	2
ad070cb3a6dc...	Training Session and Detraining Duration Affect Lower Limb Muscle Strength Maintenance in Middle-Aged and Older Adults: A Systematic Review and Meta-Analysis	2022	10.1123/japa.2020-0493	34510028	SCOPUS, EMBASE	2
c9898047be90...	Efficacy of resistance training during adjuvant chemotherapy and radiation therapy in cancer care: a systematic review and meta-analysis	2022	10.1007/s00520-021-06708-6	34993651	SCOPUS, EMBASE	2
3b75d74e9f23...	Parkinson’s disease and intensive exercise therapy — An updated systematic review and meta-analysis	2022	10.1111/ane.13579	34997759	SCOPUS, EMBASE	2
028591605e34...	Progressive Resistance Training Program Characteristics in Rehabilitation Programs Following Hip Fracture: A Meta-Analysis and Meta-Regression	2022	10.1177/21514593221090799		SCOPUS, EMBASE	2
ed2091bb7a8c...	Effectiveness of combined conventional treatment with a tailored exercise training program on wound healing in patients with venous leg ulcer: A randomized controlled trial	2022	10.1016/j.jtv.2021.06.010	34215501	SCOPUS, EMBASE	2
ae027ae0cf09...	Effects of repetitive transcranial magnetic stimulation on recovery in lower limb muscle strength and gait function following spinal cord injury: a randomized controlled trial	2022	10.1038/s41393-021-00703-8	34504284	SCOPUS, EMBASE	2
f1c71971b38c...	Effects of resistance exercise and whey protein supplementation on skeletal muscle strength, mass, physical function, and hormonal and inflammatory biomarkers in healthy active older men: a randomised, double-blind, placebo-controlled trial	2022	10.1016/j.exger.2021.111651	34896568	SCOPUS, EMBASE	2
5581d78bfe70...	Myokine Expression and Tumor-Suppressive Effect of Serum after 12 wk of Exercise in Prostate Cancer Patients on ADT	2022	10.1249/MSS.0000000000002783	34559721	SCOPUS, EMBASE	2
420e3118ecca...	Neuromuscular adaptations after 12 weeks of light- vs. heavy-load power-oriented resistance training in older adults	2022	10.1111/sms.14073	34618979	SCOPUS, EMBASE	2
468eff4c7920...	Proteomic Investigation in Plasma from Women with Fibromyalgia in Response to a 15-wk Resistance Exercise Intervention	2022	10.1249/MSS.0000000000002790	35029590	SCOPUS, EMBASE	2
9a40da92cbe2...	Effects of vitamin D3 supplementation and resistance training on 25-hydroxyvitamin d status and functional performance of older adults: A randomized placebo-controlled trial	2022	10.3390/nu14010086		SCOPUS, EMBASE	2
6546e0c08404...	Sarcojoint®, the branched-chain amino acid-based supplement, plus resistance exercise improved muscle mass in adults aged 50 years and older: A double-blinded randomized controlled trial	2022	10.1016/j.exger.2021.111644	34838980	SCOPUS, EMBASE	2
28c9d1364592...	Effects of Cardiac Rehabilitation with Lumbar-Type Hybrid Assistive Limb on Muscle Strength in Patients with Chronic Heart Failure	2022	10.1253/circj.CJ-21-0381	34511585	SCOPUS, EMBASE	2
17e419e0e1a9...	Improved Muscle Strength, Muscle Power, and Physical Function After Flywheel Resistance Training in Healthy Older Adults: A Randomized Controlled Trial	2022	10.1519/JSC.0000000000003428	32040028	SCOPUS, EMBASE	2
e70d4d082b9f...	Effects of different exercise training modes on muscle strength and physical performance in older people with sarcopenia: a systematic review and meta-analysis	2021	10.1186/s12877-021-02642-8	34911483	SCOPUS, EMBASE	2
b06c699ed2ea...	What are the impact and the optimal design of a physical prehabilitation program in patients with esophagogastric cancer awaiting surgery? A systematic review	2021	10.1186/s13102-021-00260-w		SCOPUS, EMBASE	2
c9f99e4cd9b0...	Efficacy of low-load resistance training combined with blood flow restriction vs. high-load resistance training on sarcopenia among community-dwelling older Chinese people: study protocol for a 3-arm randomized controlled trial	2021	10.1186/s13063-021-05495-z	34348792	SCOPUS, EMBASE	2
3244e87e3948...	Effects of different types of contraction exercises on shoulder function and muscle strength in patients with adhesive capsulitis	2021	10.3390/ijerph182413078	34948688	SCOPUS, EMBASE	2
588bfd6b4f8a...	Effect of Tai Chi exercise on lower limb function and balance ability in patients with knee osteoarthritis: A protocol of a randomized controlled trial	2021	10.1097/MD.0000000000027647	34797287	SCOPUS, EMBASE	2
33f8551a0cc4...	Does the combination of resistance training and a nutritional intervention have a synergic effect on muscle mass, strength, and physical function in older adults? A systematic review and meta-analysis	2021	10.1186/s12877-021-02491-5	34772342	SCOPUS, EMBASE	2
4d202b31f846...	Effects of exercise and/or β-hydroxy-β-methylbutyrate supplementation on muscle mass, muscle strength, and physical performance in older women with low muscle mass: A randomized, double-blind, placebo-controlled trial	2021	10.1093/ajcn/nqab176	34081113	SCOPUS, EMBASE	2
81825bf54784...	Musculoskeletal Responses to Exercise Plus Nutrition in Men with Prostate Cancer on Androgen Deprivation: A 12-Month RCT	2021	10.1249/MSS.0000000000002682	33867499	SCOPUS, EMBASE	2
928d0b7e13de...	Introducing Progressive Strength Training Program in Singapore's Elder Care Settings	2021	10.3389/fmed.2021.515898		SCOPUS, EMBASE	2
f15621744ed9...	Two-Year Follow-up of a Multimodal Intervention on Functional Capacity and Muscle Power in Frail Patients With Type 2 Diabetes	2021	10.1016/j.jamda.2021.06.022	34265268	SCOPUS, EMBASE	2
d384b27798a3...	Serum albumin levels as a predictive biomarker for low-load resistance training programs' effects on muscle thickness in the community-dwelling elderly Japanese population: interventional study result	2021	10.1186/s12877-021-02403-7	34407763	SCOPUS, EMBASE	2
10d3fae255d1...	Effects of Combined Endurance and Resistance Training in Women With Multiple Sclerosis: A Randomized Controlled Study	2021	10.3389/fneur.2021.698460		SCOPUS, EMBASE	2
bd5f94be7a20...	Unsupervised home-based resistance training for community-dwelling older adults: A systematic review and meta-analysis of randomized controlled trials	2021	10.1016/j.arr.2021.101368	34022464	SCOPUS, EMBASE	2
d3832c70f4af...	Effects of milk protein in resistance training-induced lean mass gains for older adults aged ≥ 60 y: A systematic review and meta-analysis	2021	10.3390/nu13082815	34444975	SCOPUS, EMBASE	2
5634cea248f4...	Effects of exercise in patients with connective tissue disease receiving high-dose glucocorticoids: A pilot prospective cohort study	2021	10.1007/s00421-021-04697-2	33914153	SCOPUS, EMBASE	2
1de7636abab4...	The influence of resistance training on neuromuscular function in middle-aged and older adults: A systematic review and meta-analysis of randomised controlled trials.	2021	10.1016/j.exger.2021.111320	33774145	SCOPUS, EMBASE	2
8dfbf25e5562...	Low-Load Unilateral and Bilateral Resistance Training to Restore Lower Limb Function in the Early Rehabilitation After Total Knee Arthroplasty: A Randomized Active-Controlled Clinical Trial	2021	10.3389/fmed.2021.628021		SCOPUS, EMBASE	2
1987b5c2a2e3...	Cardiac Rehabilitation and Complementary Physical Training in Elderly Patients after Acute Coronary Syndrome: A Pilot Study	2021	10.3390/medicina57060529	34070257	SCOPUS, EMBASE	2
260ad82ff6a5...	Iron beats electricity: Resistance training but not whole-body electromyostimulation improves cardiometabolic health in obese metabolic syndrome patients during caloric restriction—a randomized-controlled study	2021	10.3390/nu13051640	34068089	SCOPUS, EMBASE	2
fd70563a3afd...	Home-based exercise programmes improve physical fitness of healthy older adults: A PRISMA-compliant systematic review and meta-analysis with relevance for COVID-19	2021	10.1016/j.arr.2021.101265	33571702	SCOPUS, EMBASE	2
68e9b21c5df6...	Nonpharmacological interventions for respiratory health in Parkinson’s disease: A systematic review and meta-analysis	2021	10.1111/ene.14605	33098349	SCOPUS, EMBASE	2
25e8d6fa5f0a...	Effect of Antihypertensive and Statin Medication Use on Muscle Performance in Community-Dwelling Older Adults Performing Strength Training	2021	10.1007/s40266-020-00831-5	33543410	SCOPUS, EMBASE	2
e6a7b287c33c...	Resistance Exercise Dosage in Men with Prostate Cancer: Systematic Review, Meta-analysis, and Meta-regression	2021	10.1249/MSS.0000000000002503	32890199	SCOPUS, EMBASE	2
ae77501c1392...	Effects of Power-Oriented Resistance Training With Heavy vs. Light Loads on Muscle-Tendon Function in Older Adults: A Study Protocol for a Randomized Controlled Trial	2021	10.3389/fphys.2021.635094		SCOPUS, EMBASE	2
2095d91e7d51...	Low-intensity resistance training with moderate blood flow restriction appears safe and increases skeletal muscle strength and size in cardiovascular surgery patients: A pilot study	2021	10.3390/jcm10030547		SCOPUS, EMBASE	2
c81bc047836d...	Effect of a Multicomponent Exercise Program (VIVIFRAIL) on Functional Capacity in Elderly Ambulatory: A Non-Randomized Clinical Trial in Mexican Women with Dynapenia	2021	10.1007/s12603-020-1548-4	33491027	SCOPUS, EMBASE	2
342e0b6f2945...	Resistance band training after triamcinolone acetonide injection for subacromial bursitis: A randomized clinical trial	2021	10.2340/16501977-2752	33043381	SCOPUS, EMBASE	2
5bcc67dd6777...	Effects of resistance training using elastic bands on muscle strength with or without a leucine supplement for 48 weeks in elderly patients with type 2 diabetes	2021	10.1507/endocrj.EJ20-0550	33071273	SCOPUS, EMBASE	2
c6494e1626bd...	Non-randomized preliminary study of an education and elastic-band resistance exercise program on severity of neuropathy, physical function, muscle strength and endurance & quality of life in colorectal cancer patients experiencing oxaliplatin-induced peripheral neuropathy	2020	10.1016/j.ejon.2020.101834	33120223	SCOPUS, EMBASE	2
f9dd350873a8...	Effect of exergames on physical outcomes in frail elderly: a systematic review	2020	10.1007/s40520-019-01344-x	31520334	SCOPUS, EMBASE	2
a04adc1b789c...	How do resistance training and balance and motor control training affect gait performance and fatigue impact in people with multiple sclerosis? A randomized controlled multi-center study	2020	10.1177/1352458519865740	31339460	SCOPUS, EMBASE	2
1559bdb11dfe...	PRIME-HF: Novel Exercise for Older Patients with Heart Failure. A Pilot Randomized Controlled Study	2020	10.1111/jgs.16428	32293033	SCOPUS, EMBASE	2
50235d42d74d...	Effectiveness of protein supplementation combined with resistance training on muscle strength and physical performance in elderly: A systematic review and meta-analysis	2020	10.3390/nu12092607	32867103	SCOPUS, EMBASE	2
93850a4642f2...	Resistance exercise, electrical muscle stimulation, and whole-body vibration in older adults: Systematic review and meta-analysis of randomized controlled trials	2020	10.3390/jcm9092902		SCOPUS, EMBASE	2
7351bca0d0f3...	Effects of an 8-week resistance training intervention on plantar flexor muscle quality and functional capacity in older women: A randomised controlled trial	2020	10.1016/j.exger.2020.111003	32562747	SCOPUS, EMBASE	2
65b8b2c185d1...	Safety and Effectiveness of Progressive Moderate-to-Vigorous Intensity Elastic Resistance Training on Physical Function and Pain in People With Hemophilia	2020	10.1093/ptj/pzaa106	32525975	SCOPUS, EMBASE	2
84ca3b7b3688...	Effectiveness of high intensity interval training supplemented with peripheral and inspiratory resistance training in chronic heart failure: a pilot study	2020	10.1080/00015385.2019.1591676	31125296	SCOPUS, EMBASE	2
576abbf104ab...	Effect of lean red meat combined with a multicomponent exercise program on muscle and cognitive function in older adults: A 6-month randomized controlled trial	2020	10.1093/ajcn/nqaa104		EMBASE	2
f94e8e44bb22...	Effect of resistance training on quality of life in older people with sarcopenic obesity living in long-term care institutions: A quasi-experimental study	2020	10.1111/jocn.15277	32279360	SCOPUS, EMBASE	2
afd9f700eb0e...	Heavy Resistance Training in Breast Cancer Patients Undergoing Adjuvant Therapy	2020	10.1249/MSS.0000000000002260	31876673	SCOPUS, EMBASE	2
56cbb312dfc7...	The impact of malnutrition on acute muscle wasting in frail older hospitalized patients	2020	10.3390/nu12051387	32408708	SCOPUS, EMBASE	2
1788a2928651...	A 12-week exercise program for patients with hip osteoarthritis has no influence on gait parameters: A secondary analysis of a randomized controlled trial	2020	10.1016/j.gaitpost.2020.03.001	32151918	SCOPUS, EMBASE	2
62829f3b0712...	The effect of aerobic and resistance exercise training on the health related quality of life, physical function, and muscle strength among hemodialysis patients with Type 2 diabetes	2020	10.1016/j.jbmt.2019.10.003	32507160	SCOPUS, EMBASE	2
3a0b5175a1dd...	Exploring the efficacy of the expiratory muscle strength trainer to improve swallowing in inclusion body myositis: A pilot study	2020	10.1016/j.nmd.2020.02.010	32307229	SCOPUS, EMBASE	2
771246844c3d...	Effect of therapeutic exercise routine on pain, disability, posture, and health status in dentists with chronic neck pain: a randomized controlled trial	2020	10.1007/s00420-019-01480-x	31654125	SCOPUS, EMBASE	2
0cb687ee5534...	Effects of resistance exercise on glycated hemoglobin and functional performance in older patients with comorbid diabetes mellitus and knee osteoarthritis: A randomized trial	2020	10.3390/ijerph17010224	31892277	SCOPUS, EMBASE	2
3774e2dc42df...	Inertial training improves strength, balance, and gait speed in elderly nursing home residents	2020	10.2147/CIA.S234299	32103920	SCOPUS, EMBASE	2
cf84dbe4be8c...	Exercise programs for muscle mass, muscle strength and physical performance in older adults with sarcopenia: A systematic review and meta-analysis	2020	10.14336/AD.2019.1012		SCOPUS, EMBASE	2
e1fb39c09261...	Heavy-load resistance exercise during chemotherapy in physically inactive breast cancer survivors at risk for lymphedema: a randomized trial	2019	10.1080/0284186X.2019.1643916	31354000	SCOPUS, EMBASE	2
71b1d3fd32e1...	Exercise-based cardiac rehabilitation for patients with catheter ablation for persistent atrial fibrillation: A randomized controlled clinical trial	2019	10.1177/2047487319859974	31272205	SCOPUS, EMBASE	2
764f543c6a2f...	Exercise-induced pain changes associate with changes in muscle perfusion in knee osteoarthritis: Exploratory outcome analyses of a randomised controlled trial	2019	10.1186/s12891-019-2858-8	31656173	SCOPUS, EMBASE	2
8202f1d5dff7...	Dual-task training on cognition and resistance training improved both balance and working memory in older people	2019	10.1080/00913847.2019.1623996	31155997	SCOPUS, EMBASE	2
eef75b689809...	Health benefits of β-hydroxy-β-methylbutyrate (Hmb) supplementation in addition to physical exercise in older adults: A systematic review with meta-analysis	2019	10.3390/nu11092082	31484462	SCOPUS, EMBASE	2
9d161bfbdec6...	Effectiveness of combined eccentric and concentric exercise over traditional cardiac exercise rehabilitation programme in patients with chronic heart failure: Protocol for a randomised controlled study	2019	10.1136/bmjopen-2018-028749	31558450	SCOPUS, EMBASE	2
3c2d3166fa24...	Combined aerobic and resistance training improves microcirculation in metabolic syndrome	2019	10.23736/S0022-4707.18.09077-1	30421869	SCOPUS, EMBASE	2
e6ac5677bb41...	Prevalence of sarcopenia in patients with geriatric depression diagnosis	2019	10.1007/s11845-018-01957-7	30610679	SCOPUS, EMBASE	2
5550a01c3186...	Effects of free weights and machine training on muscular strength in high-functioning older adults	2019	10.1016/j.exger.2019.03.012	30980922	SCOPUS, EMBASE	2
61199f4ce706...	Effects of β-hydroxy-β-methylbutyrate (HMB) supplementation in addition to multicomponent exercise in adults older than 70 years living in nursing homes, a cluster randomized placebo-controlled trial: the HEAL study protocol	2019	10.1186/s12877-019-1200-5	31277595	SCOPUS, EMBASE	2
dc0d95fe40bd...	Cycle ergometer training vs resistance training in ICU-acquired weakness	2019	10.1111/ane.13102	30977897	SCOPUS, EMBASE	2
29564de6b303...	Twenty-four-week hospital-based progressive resistance training on functional recovery in female patients post total knee arthroplasty	2019	10.1016/j.knee.2019.02.008	30902510	SCOPUS, EMBASE	2
c246f1bf90d2...	Improvement in Skeletal Muscle Strength and Plasma Levels of Follistatin and Myostatin Induced by an 8-Week Resistance Training and Epicatechin Supplementation in Sarcopenic Older Adults	2019	10.1123/japa.2017-0389	30299198	SCOPUS, EMBASE	2
2cf972f73fc1...	Synergistic effect of bodyweight resistance exercise and protein supplementation on skeletal muscle in sarcopenic or dynapenic older adults	2019	10.1111/ggi.13643	30864254	SCOPUS, EMBASE	2
3027a323f2af...	Preoperative high-intensity strength training improves postural control after TKA: randomized-controlled trial	2019	10.1007/s00167-018-5246-2	30361758	SCOPUS, EMBASE	2
bd01c2aef6f6...	Karate Intervention to Change Kinematic Outcomes in Parkinson's Disease.	2019			EMBASE	2
da0d9b4e3fa4...	Inspiratory muscle strength training improves lung function in patients with the hypermobile Ehlers–Danlos syndrome: A randomized controlled trial	2019	10.1002/ajmg.a.61016	30569502	SCOPUS, EMBASE	2
e98b32f9e98d...	Effects of resistance training and/or beta-hydroxy-beta-methylbutyrate supplementation on muscle mass, muscle strength and physical performance in older women with reduced muscle mass: protocol for a randomised, double-blind, placebo-controlled trial	2019	10.1136/bmjopen-2018-025723	30819711	EMBASE	2
6b09979a4ee9...	Relationship of Physical Function to Single Muscle Fiber Contractility in Older Adults: Effects of Resistance Training With and Without Caloric Restriction	2019	10.1093/gerona/gly047	29546320	SCOPUS, EMBASE	2
d61b5a499e89...	Effects of a leucine-enriched amino acid supplement on muscle mass, muscle strength, and physical function in post-stroke patients with sarcopenia: A randomized controlled trial	2019	10.1016/j.nut.2018.05.028	30273819	SCOPUS, EMBASE	2
f2e46f3d83d7...	Effect and feasibility of non-linear periodized resistance training in people with COPD: Study protocol for a randomized controlled trial	2019	10.1186/s13063-018-3129-y	30606240	SCOPUS, EMBASE	2
0afd27372f30...	Circulating irisin and myostatin as markers of muscle strength and physical condition in elderly subjects	2019	10.3389/fphys.2019.00871		SCOPUS, EMBASE	2
cc540acb2466...	Exercise training-induced effects on the abdominal subcutaneous adipose tissue phenotype in humans with obesity	2018	10.1152/japplphysiol.00496.2018	30212302	SCOPUS, EMBASE	2
8dadd69d486e...	Resistance training improves neuromuscular health in the elderly with type 2 diabetes: A randomised clinical trial	2018	10.1007/s00125-018-4693-0		EMBASE	2
4aef1832082c...	Sarcopenia: A Rheumatic Disease?	2018	10.1016/j.rdc.2018.03.001	30001782	SCOPUS, EMBASE	2
587d24533ff1...	No Exacerbation of Knee Joint Pain and Effusion Following Preoperative Progressive Resistance Training in Patients Scheduled for Total Knee Arthroplasty: Secondary Analyses From a Randomized Controlled Trial	2018	10.1016/j.pmrj.2017.11.002	29129608	SCOPUS, EMBASE	2
c2be9a1d765c...	Highly favorable physiological responses to concurrent resistance and high-intensity interval training during chemotherapy: the OptiTrain breast cancer trial	2018	10.1007/s10549-018-4663-8	29349712	SCOPUS, EMBASE	2
167caa43a031...	Physical activity combined with resistance training reduces symptoms of frailty in older adults: A randomized controlled trial	2018	10.1016/j.archger.2018.02.005	29455058	SCOPUS, EMBASE	2
86eacccd346a...	Exercise alone or combined with dietary supplements for sarcopenic obesity in community-dwelling older people: A systematic review of randomized controlled trials	2018	10.1016/j.maturitas.2018.02.005	29563041	SCOPUS, EMBASE	2
74f3dbea502d...	Effects of home-based lower limb resistance training on muscle strength and functional status in stable Chronic obstructive pulmonary disease patients	2018	10.1111/jocn.14131	29076609	SCOPUS, EMBASE	2
cf08536ba480...	A resistance exercise program improves functional capacity of patients with psoriatic arthritis: a randomized controlled trial	2018	10.1007/s10067-017-3917-x	29185133	SCOPUS, EMBASE	2
493e2de6b441...	Protein-enriched, milk-based supplement to counteract sarcopenia in acutely ill geriatric patients offered resistance exercise training during and after hospitalisation: Study protocol for a randomised, double-blind, multicentre trial	2018	10.1136/bmjopen-2017-019210	29391380	SCOPUS, EMBASE	2
65ac548f05c4...	Effects of resistance training on body composition and functional capacity among sarcopenic obese residents in long-term care facilities: a preliminary study	2018	10.1186/s12877-018-0714-6	29357826	SCOPUS, EMBASE	2
389146ba12b9...	Functional outcomes and quality of life after a 6-month early intervention program for oral cancer survivors: A single-arm clinical trial	2018	10.7717/peerj.4419		SCOPUS, EMBASE	2
5b14d6035fdc...	Twelve weeks’ progressive resistance training combined with protein supplementation beyond habitual intakes increases upper leg lean tissue mass, muscle strength and extended gait speed in healthy older women	2017	10.1007/s10522-016-9671-7	27933408	SCOPUS, EMBASE	2
5335b20f30da...	Effects of aerobic and resistance training combined with fortified milk on muscle mass, muscle strength, and physical performance in older adults: A randomized controlled trial	2017	10.1007/s12603-016-0864-1	29188900	SCOPUS, EMBASE	2
18404c35a316...	Effects of Combined Aerobic-Strength Training vs Fitness Education Program in COPD Patients	2017	10.1055/s-0043-112339	28982202	SCOPUS, EMBASE	2
df35b7ca41be...	Effects of Supervised vs. Unsupervised Training Programs on Balance and Muscle Strength in Older Adults: A Systematic Review and Meta-Analysis	2017	10.1007/s40279-017-0747-6	28573401	SCOPUS, EMBASE	2
9cb430377d79...	Resistance Training Improves Sleep Quality in Subjects With Moderate Parkinson's Disease	2017	10.1519/JSC.0000000000001685	27787472	SCOPUS, EMBASE	2
e8ae852d53f6...	Preoperative exercise training prevents functional decline after lung resection surgery: a randomized, single-blind controlled trial	2017	10.1177/0269215516684179	28730888	SCOPUS, EMBASE	2
7a3b2f5267bb...	Effectiveness of nutritional and exercise interventions to improve body composition and muscle strength or function in sarcopenic obese older adults: A systematic review	2017	10.1016/j.nutres.2017.05.002	28739051	SCOPUS, EMBASE	2
57af171eb343...	Muscle strength and cognition in ageing men and women: The DR's EXTRA study	2017	10.1016/j.eurger.2017.04.004		SCOPUS, EMBASE	2
780dbdc6ea87...	Effects of High- and Low-Velocity Resistance Training on Gait Kinematics and Kinetics in Individuals with Hip Osteoarthritis: A Randomized Controlled Trial	2017	10.1097/PHM.0000000000000640	27754998	SCOPUS, EMBASE	2
cf3d0548431d...	Exercise therapy in patients with hip osteoarthritis: Effect on hip muscle strength and safety aspects of exercise—results of a randomized controlled trial	2017	10.1080/14397595.2016.1213940	27486681	SCOPUS, EMBASE	2
b2b3836c6b6c...	Effects of an integrated health education and elastic band resistance training program on physical function and muscle strength in community-dwelling elderly women: Healthy Aging and Happy Aging II study	2017	10.1111/ggi.12795	27138245	SCOPUS, EMBASE	2
840606bbfe6c...	Muscle strength in breast cancer patients receiving different treatment regimes	2017	10.1002/jcsm.12165	27896952	SCOPUS, EMBASE	2
ba357dda3465...	Effects of 12 weeks resistance training on serum irisin in older male adults	2017	10.3389/fphys.2017.00171		SCOPUS, EMBASE	2
07ecc817a6e8...	Mediation of Cognitive Function Improvements by Strength Gains After Resistance Training in Older Adults with Mild Cognitive Impairment: Outcomes of the Study of Mental and Resistance Training	2017	10.1111/jgs.14542	28304092	SCOPUS, EMBASE	2
58331d2da2fa...	Effect of expiratory muscle strength training intervention on the maximum expiratory pressure and quality of life of patients with Parkinson disease	2017	10.3233/NRE-171474	28527233	SCOPUS, EMBASE	2
f73361d6a27e...	Tongue-to-palate resistance training improves tongue strength and oropharyngeal swallowing function in subacute stroke survivors with dysphagia	2017	10.1111/joor.12461	27883209	SCOPUS, EMBASE	2
a94e237e00de...	Effects of resistance expiratory muscle strength training in elderly patients with dysphagic stroke	2017	10.3233/NRE-172192	29254116	SCOPUS, EMBASE	2
b5a2b21027cf...	Resistance Training with Instability for Patients with Parkinson's Disease	2016	10.1249/MSS.0000000000000945	27054681	SCOPUS, EMBASE	2
89155a00e60b...	Effects of resistance training on muscle strength, exercise capacity, and mobility in middle-aged and elderly patients with coronary artery disease: A meta-analysis	2016	10.1016/j.jjcc.2015.09.005	26690738	SCOPUS, EMBASE	2
e120a021f84e...	Positive effects of 1-year football and strength training on mechanical muscle function and functional capacity in elderly men	2016	10.1007/s00421-016-3368-0	27068158	SCOPUS, EMBASE	2
9fbf2ce034c0...	Effects of expiratory muscle strength training on oropharyngeal dysphagia in subacute stroke patients: a randomised controlled trial	2016	10.1111/joor.12382	26803525	SCOPUS, EMBASE	2
83f87314c8bf...	Controlled pilot study of the effects of power yoga in Parkinson's disease	2016	10.1016/j.ctim.2016.01.007	27062960	SCOPUS, EMBASE	2
52a181585be2...	Effects and feasibility of exercise therapy combined with branched-chain amino acid supplementation on muscle strengthening in frail and pre-frail elderly people requiring long-term care: a crossover trial	2016	10.1139/apnm-2015-0436	26963483	SCOPUS, EMBASE	2
0cf61caba7df...	Inpatient rehabilitation improves functional capacity, peripheral muscle strength and quality of life in patients with community-acquired pneumonia: a randomised trial	2016	10.1016/j.jphys.2016.02.014	26996093	SCOPUS, EMBASE	2
a723ef510447...	Preoperative progressive explosive-type resistance training is feasible and effective in patients with hip osteoarthritis scheduled for total hip arthroplasty - a randomized controlled trial	2016	10.1016/j.joca.2015.07.030	26285180	SCOPUS, EMBASE	2
0a3b75589bb5...	Dose-Response Relationships of Resistance Training in Healthy Old Adults: A Systematic Review and Meta-Analysis	2015	10.1007/s40279-015-0385-9	26420238	SCOPUS, EMBASE	2
6484e725c141...	Oxandrolone Augmentation of Resistance Training in Older Women: A Randomized Trial	2015	10.1249/MSS.0000000000000690	25899102	SCOPUS, EMBASE	2
806feaa935a5...	Does training frequency and supervision affect compliance, performance and muscular health? A cluster randomized controlled trial	2015	10.1016/j.math.2015.01.016	25816746	SCOPUS, EMBASE	2
ee98ba47bd33...	Rehabilitation procedures in the management of gait disorders in the elderly	2015			SCOPUS, EMBASE	2
d3fd250e6069...	Does vitamin-D intake during resistance training improve the skeletal muscle hypertrophic and strength response in young and elderly men? - A randomized controlled trial	2015	10.1186/s12986-015-0029-y		SCOPUS, EMBASE	2
041b62204b2b...	Exercise therapy for fatigue in multiple sclerosis	2015	10.1002/14651858.CD009956.pub2	26358158	SCOPUS, EMBASE	2
6907f362ea30...	Supervised physical exercise improves VO(2max), quality of life, and health in early stage breast cancer patients: a randomized controlled trial	2015	10.1007/s10549-015-3541-x	26293147	SCOPUS, EMBASE	2
bcb45a90a3aa...	Effects of feedback-based balance and core resistance training vs. Pilates training on balance and muscle function in older women: A randomized-controlled trial	2015	10.1016/j.archger.2015.05.009	26036209	SCOPUS, EMBASE	2
ec853162e489...	Collagen peptide supplementation in combination with resistance training improves body composition and increases muscle strength in elderly sarcopenic men: A randomised controlled trial	2015	10.1017/S0007114515002810	26353786	SCOPUS, EMBASE	2
83b0fd641350...	Changes in lower extremity muscle mass and muscle strength after weight loss in obese men: A prospective study	2015	10.1016/j.orcp.2014.12.002	25892542	SCOPUS, EMBASE	2
40b07c8947e0...	Combined training enhances skeletal muscle mitochondrial oxidative capacity independent of age	2015	10.1210/jc.2014-3081	25599385	EMBASE	2
2a14f353cfa4...	Effects of a Whole body vibration (WBV) exercise intervention for institutionalized older people: A randomized, multicentre, parallel, clinical trial	2015	10.1016/j.jamda.2014.07.018	25282631	SCOPUS, EMBASE	2

## Sheet: 3 avaliados por titulo e resumo
Título	Ano
The Impact of Power Training on Muscle Power, Physical Performance, and Physical Functioning in Older Adults: A Descriptive Case Series	2025
Power Training in Older Adults with Knee Osteoarthritis	2021
Effects of a Power Training at Two Different Loads on Muscle Quality and Functional Capacity in Women Aged 65-75.	2020
Novel individualized power training protocol preserves physical function in adult and older mice	2019
Exercise and dietary-protein as a countermeasure to skeletal muscle weakness: Liverpool Hope University - Sarcopenia aging trial (LHU-SAT)	2019
Feasibility of Ballistic Strength Training in Subacute Stroke: A Randomized, Controlled, Assessor-Blinded Pilot Study	2018
Higher muscle power training volume is not determinant for the magnitude of neuromuscular improvements in elderly women	2018
The effect of 10-week plyometric training program on muscle strength of the upper and lower limbs, lean body mass, and insulin-like growth factor 1 in young women	2017
Power Training-induced Increases in Muscle Activation during Gait in Old Adults	2017
Ballistic strength training compared with usual care for improving mobility following traumatic brain injury: protocol for a randomised, controlled trial	2016
Preoperative progressive explosive-type resistance training is feasible and effective in patients with hip osteoarthritis scheduled for total hip arthroplasty - a randomized controlled trial	2016
Power training induced change in bradykinesia and muscle power in Parkinson's disease	2016
Physical exercise and sarcopenia in older people: Position paper of the Italian Society of Orthopaedics and Medicine (OrtoMed)	2014
Power training and postmenopausal hormone therapy affect transcriptional control of specific co-regulated gene clusters in skeletal muscle	2010
Plyometric training versus resistive exercises after acute lateral ankle sprain	2010
Association Between Reactive Strength Index and Metabolic Cost of Running in Male Master Athletes	2025
Relationship between reactive strength and leg stiffness at submaximal velocity: Effects of age on distance runners	2021
Results from the randomized controlled IHOPE trial suggest no effects of oral protein supplementation and exercise training on physical function in hemodialysis patients	2019
Exercise and dietary-protein as a countermeasure to skeletal muscle weakness: Liverpool Hope University - Sarcopenia aging trial (LHU-SAT)	2019
Feasibility of Ballistic Strength Training in Subacute Stroke: A Randomized, Controlled, Assessor-Blinded Pilot Study	2018
Skeletal muscle strength after orthopic heart transplantation Kraftstatus der skelettmuskulatur nach orthotoper herztransplantation	1999
Plyometric Exercise With Obese Children	2021
Does 8 Weeks of Integrated Functional Core and Plyometric Training Improve Postural Control Performance in Young Rhythmic Gymnasts?	2022
Effects of Different Acute Plyometric Training Intensities on Attention and Psychological States	2022
Improving neuromuscular performance in young basketball players: plyometric vs. technique training	2015
Kinetics and Vertical Stiffness of Female Volleyball Players: effect of Low-Intensity Plyometric Training	2022
High-Intensity Forward-Backward Plyometrics After the Warm-Up Entail Better Sprint and Change-of-Direction Performance Than Low-Intensity Side-to-Side Plyometrics	2024
Plyometric Training Improves Not Only Measures of Linear Speed, Power, and Change-of-Direction Speed But Also Repeated Sprint Ability in Young Female Handball Players	2021
The Effect of Varying Plyometric Volume on Stretch-Shortening Cycle Capability in Collegiate Male Rugby Players	2019
The Effects of an Eight-Week Integrated Functional Core and Plyometric Training Program on Young Rhythmic Gymnasts' Explosive Strength	2023
THE EFFECTS OF ASSISTED AND RESISTED PLYOMETRIC TRAINING ON JUMP HEIGHT AND SPRINT PERFORMANCE AMONG PHYSICALLY ACTIVE FEMALES	2022
Effects of Isometric Strength and Plyometric Training on Running Performance: a Randomized Controlled Study	2023
Effect of weekly Plyometric training frequency on Adolescents female basketball players during in-season: a comparison of two vs. four sessions	2025
The effects of footwear on dynamic stability and impact loading in jump landing	2025
The effects of plyometric exercises on mood in premenopausal women	2015
Effects of Maturation on Physical Fitness Adaptations to Plyometric Drop Jump Training in Male Youth Soccer Players	2020
Effects of Plyometric Exercises in Female Fast Bowlers	2024
Kinetic and Kinematic Changes in Vertical Jump in Prepubescent Girls After 10 Weeks of Plyometric Training	2020
Changes in Sprint and Jump Performances After Traditional, Plyometric, and Combined Resistance Training in Male Youth Pre- and Post-Peak Height Velocity	2016
The effects of strength vs. plyometric training on sprinting kinetics in post peak height velocity (PHV) female athletes	2024
The Effect of Plyometric Training Volume on Athletic Performance in Prepubertal Male Soccer Players	2017
The effects of jump training on measures of physical performance, lower extremities injury incidence and burden in highly trained male soccer players	2024
A Comparison of the Effects of Short-Term Plyometric and Resistance Training on Lower-Body Muscular Performance	2018
Effects of Progressed and Nonprogressed Volume-Based Overload Plyometric Training on Components of Physical Fitness and Body Composition Variables in Youth Male Basketball Players	2021
Effect of Strength vs. Plyometric Training upon Change of Direction Performance in Young Female Handball Players	2022
The Effects of Plyometric Jump Training on Jumping and Swimming Performances in Prepubertal Male Swimmers	2019
Effects of an In-season Plyometric Training Program on Repeated Change of Direction and Sprint Performance in the Junior Soccer Player	2016
A randomised controlled trial of 1- versus 2-day per week formats of Nordic hamstring training on explosive athletic tasks in prepubertal soccer players	2022
Comparative effects of single vs. double weekly plyometric training sessions on jump, sprint and change of directions abilities of elite youth football players	2019
Improving the Q: h strength ratio in women using plyometric exercises	2011
Effects of short-term in-season plyometric training in adolescent female basketball players	2019
Influence of force-vector and force application plyometric training in young elite basketball players	2019
Improvement of Repeated-Sprint Ability and Horizontal-Jumping Performance in Elite Young Basketball Players With Low-Volume Repeated-Maximal-Power Training	2016
Effects of Plyometric Training on Neuromuscular Performance in Youth Basketball Players: a Pilot Study on the Influence of Drill Randomization	2018
Effects of Unilateral, Bilateral and Combined Plyometric Jump Training on Asymmetry of Muscular Strength and Power, and Change-of-Direction in Youth Male Basketball Players	2024
Accentuated Eccentric Loading in Countermovement Jumps Vs. Drop Jumps: effects on Jump Performance and Strength in A Randomized Controlled Trial	2025
Efficacy of plyometric exercises on upper extremity function, selective motor control and hand grip strength in children with unilateral cerebral palsy: a randomized controlled study	2024
My Coach Says: the Effects of Accelerated Eccentric and Landing Cues to Elicit Change in Countermovement Jump Propulsive and Landing Performance	2025
Effects of Plyometric Training Volume on Physical Performance in Youth Basketball Players	2024
Vertical- vs. Horizontal-Oriented Drop Jump Training: chronic Effects on Explosive Performances of Elite Handball Players	2017
Effects of Equal Volume But Different Plyometric Jump Training Intensities on Components of Physical Fitness in Physically Active Young Males	2021
Evaluating the Effects of Consecutive Phases of Plyometric Jump Training on Athletic Performance in Male Soccer Players: the Effect of Training Frequency and Volume Manipulations	2024
The Acute Effects of Milk Consumption on Systemic Inflammation after Combined Resistance and Plyometric Exercise in Young Adult Females	2022
Bipedal hopping timed to a metronome to detect impairments in anticipatory motor control in people with mild multiple sclerosis	2018
Effect of plyometric exercise training on functional performance and muscle strenght in adolescent volleyball players	2015
Effect of knee joint cooling on the electromyographic activity of lower extremity muscles during a plyometric exercise	2011
Relationship between infrared thermography and muscle damage markers in physically active men after plyometric exercise	2022
EFFECTIVENESS OF PLYOMETRIC EXERCISES TO IMPROVE BALANCE AMONG NON-ELITE FOOTBALL PLAYERS	2023
Effects of 8-Week Jump Training Program on Sprint and Jump Performance and Leg Strength in Pre- and Post-Peak Height Velocity Aged Boys	2020
Effects of Accentuated Eccentric Training vs Plyometric Training on Performance of Young Elite Fencers	2020
Adaptations in movement performance after plyometric training on mini-trampoline in children	2018
The effect of a low-load plyometric intervention on running kinematics in youth with cerebral palsy: a randomised controlled trial	2025
Optimal Reactive Strength Index: is It an Accurate Variable to Optimize Plyometric Training Effects on Measures of Physical Fitness in Young Soccer Players?	2018
Skeletal Muscle Contraction Time and Tone Decrease After 8 Weeks of Plyometric Training	2017
Effects of Plyometric Training on Physical Fitness in Prepuberal Soccer Athletes	2017
Effects of Combined Plyometric and Short Sprint With Change-of-Direction Training on Athletic Performance of Male U15 Handball Players	2019
Effects of Plyometric Training on Running Biomechanics and Jumping Ability of U14 Athletes	2024
Effects of Plyometric and Directional Training on Physical Fitness Parameters in Youth Soccer Players	2019
Men and Women Exhibit Similar Acute Hypotensive Responses After Low, Moderate, or High-Intensity Plyometric Training	2016
Effects of a contrast training program without external load on vertical jump, kicking speed, sprint, and agility of young soccer players	2014
Effect of unilateral, bilateral, and combined plyometric training on explosive and endurance performance of young soccer players	2015
Effects of plyometric training on maximal-intensity exercise and endurance in male and female soccer players	2016
A biomechanical comparison of countermovement performance after short-term traditional and daily-undulated loaded vertical jump training	2018
Plyometric exercises: subsequent changes of weight-bearing symmetry, muscle strength and walking performance in children with unilateral cerebral palsy	2019
The effects of barbell load on countermovement vertical jump power and net impulse	2017
Efficacy of Plyometric Exercises Versus Wii Training on Upper Extremity Function in Children With Unilateral Cerebral Palsy: a Comparative Study	2025
Effects of plyometric training on different 8-week training intensity distributions in well-trained endurance runners	2023
Effect of plyometric training on handspring vault performance and functional power in youth female gymnasts	2016
Effects of high-intensity interval training and plyometric exercise on the physical fitness of junior male handball players	2021
Chronobiological Insights in Plyometric Jump Training: optimizing Sport-Performance Adaptations for Volleyball Players	2024
Comparing The Effects of Maximal Strength Training, Plyometric Training, and Muscular Endurance Training on Swimming-Specific Performance Measures: a Randomized Parallel Controlled Study in Young Swimmers	2025
Eight-Week Flywheel Training Enhances Jump Performance and Stretch-Shortening Cycle Function in Collegiate Basketball Players	2025
Comparison of the symptoms of exercise-induced muscle damage after an initial and repeated bout of plyometric exercise in men and boys	2005
Short-term landing training attenuates landing impact and improves jump height in landing-to-jump movement	2013
Effects of Elastic Band Based Plyometric Exercise on Explosive Muscular Performance and Change of Direction Abilities of Male Team Handball Players	2020
Plyometric Exercises in Ankle Range of Motion and Sural Triceps Strength in the Jump in Basketball Players	2020
Effects of plyometric exercises along with domain specific coordination training for dynamic balance and agility in amateur badminton players	2024
Effects of Plyometric Exercises versus Flatfoot Corrective Exercises on Postural Control and Foot Posture in Obese Children with a Flexible Flatfoot	2021
Efficacy of aqua-based plyometric exercises in the rehabilitation of patients with juvenile dermatomyositis: a randomized crossover pilot study	2021
Effects of flexibility combined with plyometric exercises vs isolated plyometric or flexibility mode in adolescent male hurdlers	2020
How Plyometric Exercises Compare to Standard Physiotherapy in Improving Balance and Body Awareness in Bharatanatyam Dancers with Flat Feet	2025
The Effect of Shoulder Plyometric Training on Amortization Time and Upper-Extremity Kinematics	2016
Effects of Combined Balance and Plyometric Training on Athletic Performance in Female Basketball Players	2020
The Increased Effectiveness of Loaded Versus Unloaded Plyometric Jump Training in Improving Muscle Power, Speed, Change of Direction, and Kicking-Distance Performance in Prepubertal Male Soccer Players	2020
The effects of interday rest on adaptation to 6 weeks of plyometric training in young soccer players	2015
Effects of plyometric training and creatine supplementation on maximal-intensity exercise and endurance in female soccer players	2016
Effects of a contrast training programme on jumping, sprinting and agility performance of prepubertal basketball players	2018
Effects of Plyometric Training on Components of Physical Fitness in Prepuberal Male Soccer Athletes: the Role of Surface Instability	2017
Plyometrics' trainability in preadolescent soccer athletes	2013
Effect of Progressive Volume-Based Overload During Plyometric Training on Explosive and Endurance Performance in Young Soccer Players	2015
Effects of 12-week power training on bone in mobility-limited older adults: randomised controlled trial	2025
Influence of strength and power training on the rate of force development, peak force and functional mobility in elderly people with Parkinson's disease: a randomized controlled trial	2025
Effect of power training on function and body composition in older women with probable sarcopenia. A study protocol for a randomized controlled trial	2025
Effect of lower-extremity muscle power training on muscle strength, balance function and walking ability in older adults with heart failure: a randomized controlled trial	2024
The Effects of Power Training Frequency on Muscle Power and Functional Performance in Older Women: A Randomized Controlled Trial	2023
Effectiveness of Power Training Compared With Non-specific Exercises on Functionality and Body Composition in Women Older Than 65 Years With Probable Sarcopenia.	2023
Effect of High-Intensity Power Training on Cognitive Function in Older Adults With Type 2 Diabetes: Secondary Outcomes of the GREAT2DO Study	2022
Effectiveness of Community-Delivered Functional Power Training Program for Frail and Pre-frail Community-Dwelling Older Adults: a Randomized Controlled Study	2021
Effects of slow- v. fast-digested protein supplementation combined with mixed power training on muscle function and functional capacities in older men	2021
Postexercise Hypotension After Muscle Power Training Session in Older Adults With Hypertension	2020
Effectiveness of resistance and jump training or machine-based isometric training for middle-aged and older men with osteopenia and osteoporosis: LIFTMOR for men trial preliminary findings Pr-e print	2019
Changes in muscle quality following 12 weeks of power training in mobility-limited older adults: A randomized controlled trial	2017
Power training using pneumatic machines vs. plate-loaded machines to improve muscle power in older adults	2017
Voluntary muscle activation improves with power training and is associated with changes in gait speed in mobility-limited older adults - A randomized controlled trial	2016
Effect of traditional resistance and power training using rated perceived exertion for enhancement of muscle strength, power, and functional performance	2016
Effectiveness of dual-task functional power training for preventing falls in older people: Study protocol for a cluster randomised controlled trial	2015
Comparative effects of light or heavy resistance power training for improving lower extremity power and physical performance in mobility-limited older adults	2015
The effects of strength and power training on single-step balance recovery in older adults: A preliminary study	2014
High-speed power training in older adults: A shift of the external resistance at which peak power is produced	2014
Effects of a targeted multimodal exercise program incorporating high-speed power training on falls and fracture risk factors in older adults: A community-based randomized controlled trial	2014
Oxidative stress responses to a graded maximal exercise test in older adults following explosive-type resistance training	2014
Multicomponent exercises including muscle power training enhance muscle mass, power output, and functional outcomes in institutionalized frail nonagenarians	2014
Residual effects of muscle strength and muscle power training and detraining on physical function in community-dwelling prefrail older adults: a randomized controlled trial.	2012
Effects of strength training versus power training on physical performance in prefrail community-dwelling older adults	2012
High velocity power training with weight-bearing and balance exercises improves bone density and function in high risk older adults: A 12-month RCT	2011
The Effect of High-speed Power Training on Muscle Performance, Function and Pain in Older Adults With Knee OA	2011
A comparison of high-speed power training and traditional slow-speed resistance training in older men and women.	2010
Lower extremity muscle function after strength or power training in older adults	2009
Lower extremity power training in elderly subjects with mobility limitations: A randomized controlled trial	2008
Power training improves balance in healthy older adults	2006
Higher muscle power training volume is not determinant for the magnitude of neuromuscular improvements in elderly women	2018
An age-adapted plyometric exercise program improves dynamic strength, jump performance and functional capacity in older men either similarly or more than traditional resistance training	2020
Plyometric Exercise For Quality Of Sleep And Wellbeing Of The Elderly	2022
Improving Power Output in Older Adults Using Plyometrics in a Body Mass-Supported Treadmill	2018
Effects of 12-week power training on bone in mobility-limited older adults: randomised controlled trial	2025
Influence of strength and power training on the rate of force development, peak force and functional mobility in elderly people with Parkinson's disease: a randomized controlled trial	2025
Effect of power training on function and body composition in older women with probable sarcopenia. A study protocol for a randomized controlled trial	2025
Effect of lower-extremity muscle power training on muscle strength, balance function and walking ability in older adults with heart failure: a randomized controlled trial	2024
The Effects of Power Training Frequency on Muscle Power and Functional Performance in Older Women: A Randomized Controlled Trial	2023
Effectiveness of Power Training Compared With Non-specific Exercises on Functionality and Body Composition in Women Older Than 65 Years With Probable Sarcopenia.	2023
Effect of High-Intensity Power Training on Cognitive Function in Older Adults With Type 2 Diabetes: Secondary Outcomes of the GREAT2DO Study	2022
Effectiveness of Community-Delivered Functional Power Training Program for Frail and Pre-frail Community-Dwelling Older Adults: a Randomized Controlled Study	2021
Effects of slow- v. fast-digested protein supplementation combined with mixed power training on muscle function and functional capacities in older men	2021
Postexercise Hypotension After Muscle Power Training Session in Older Adults With Hypertension	2020
Effectiveness of resistance and jump training or machine-based isometric training for middle-aged and older men with osteopenia and osteoporosis: LIFTMOR for men trial preliminary findings Pr-e print	2019
Changes in muscle quality following 12 weeks of power training in mobility-limited older adults: A randomized controlled trial	2017
Power training using pneumatic machines vs. plate-loaded machines to improve muscle power in older adults	2017
Voluntary muscle activation improves with power training and is associated with changes in gait speed in mobility-limited older adults - A randomized controlled trial	2016
Effect of traditional resistance and power training using rated perceived exertion for enhancement of muscle strength, power, and functional performance	2016
Effectiveness of dual-task functional power training for preventing falls in older people: Study protocol for a cluster randomised controlled trial	2015
Comparative effects of light or heavy resistance power training for improving lower extremity power and physical performance in mobility-limited older adults	2015
The effects of strength and power training on single-step balance recovery in older adults: A preliminary study	2014
High-speed power training in older adults: A shift of the external resistance at which peak power is produced	2014
Effects of a targeted multimodal exercise program incorporating high-speed power training on falls and fracture risk factors in older adults: A community-based randomized controlled trial	2014
Oxidative stress responses to a graded maximal exercise test in older adults following explosive-type resistance training	2014
Multicomponent exercises including muscle power training enhance muscle mass, power output, and functional outcomes in institutionalized frail nonagenarians	2014
Residual effects of muscle strength and muscle power training and detraining on physical function in community-dwelling prefrail older adults: a randomized controlled trial.	2012
Effects of strength training versus power training on physical performance in prefrail community-dwelling older adults	2012
High velocity power training with weight-bearing and balance exercises improves bone density and function in high risk older adults: A 12-month RCT	2011
The Effect of High-speed Power Training on Muscle Performance, Function and Pain in Older Adults With Knee OA	2011
A comparison of high-speed power training and traditional slow-speed resistance training in older men and women.	2010
Lower extremity muscle function after strength or power training in older adults	2009
Lower extremity power training in elderly subjects with mobility limitations: A randomized controlled trial	2008
Power training improves balance in healthy older adults	2006
Higher muscle power training volume is not determinant for the magnitude of neuromuscular improvements in elderly women	2018
An age-adapted plyometric exercise program improves dynamic strength, jump performance and functional capacity in older men either similarly or more than traditional resistance training	2020
Plyometric Exercise For Quality Of Sleep And Wellbeing Of The Elderly	2022
Improving Power Output in Older Adults Using Plyometrics in a Body Mass-Supported Treadmill	2018
A Comparison of the Effects of Short-Term Plyometric and Resistance Training on Lower-Body Muscular Performance	2018
Effects of Progressed and Nonprogressed Volume-Based Overload Plyometric Training on Components of Physical Fitness and Body Composition Variables in Youth Male Basketball Players	2021

## Sheet: 4_excluídos na promeira análise
Título	Ano	Fonte	Motivos
Effects of Creatine Monohydrate Supplementation on Muscle, Bone and Brain- Hope or Hype for Older Adults?	2025	PUBMED	Metodologia não especifica claramente se é ECR; Intervenção não é treinamento de saltos
Effects of eccentric cycling training on the physical performance of patients with chronic obstructive pulmonary disease: A systematic review of randomized clinical trials ORIGINAL (NON-ENGLISH) TITLE Effets de l'entraînement en cyclisme excentrique sur la performance physique des patients atteints de bronchopneumopathie chronique obstructive : revue systématique des essais cliniques randomisés	2025	PUBMED	Tipo de estudo inadequado (não é ECR); Intervenção não é treinamento de saltos
Effects of Neuromuscular Electrical Stimulation on Muscle Weakness Among Older Populations with Nonneurologic and Nonorthopedic Pathologies: A Systematic Review	2025	PUBMED	Tipo de estudo inadequado (não é ECR); Intervenção não é treinamento de saltos
Unveiling the benefits of stretch-shortening cycle exercise for children with obstetric brachial plexus injury: a clinical trial assessing muscle strength, bone mineral density, and functional capacity	2025	PUBMED	Intervenção não é treinamento de saltos
The association between maximal muscle strength, disease severity and psychopharmacotherapy among young to middle-aged inpatients with affective disorders – a prospective pilot study	2024	PUBMED	Metodologia não especifica claramente se é ECR; Intervenção não é treinamento de saltos
Psychophysiological Adaptations to Exercise Training in COVID-19 Patients: A Systematic Review	2024	PUBMED	Tipo de estudo inadequado (não é ECR); Faixa etária não está claramente especificada; Intervenção não é treinamento de saltos
Stretch-shortening Cycle Exercise: a Clinical Trial Investigating Its Role for Strength, Bone Mineral Density, and Functional Capacity in Children With Obstetric Brachial Plexus Injury	2023	PUBMED	Intervenção não é treinamento de saltos
Efficacy of power training to improve physical function in individuals diagnosed with frailty and chronic disease: A meta-analysis	2022	PUBMED	Tipo de estudo inadequado (não é ECR)
Distinct effects of trampoline-based stretch-shortening cycle exercises on muscle strength and postural control in children with Down syndrome: a randomized controlled study	2022	PUBMED	Faixa etária não está claramente especificada; Intervenção não é treinamento de saltos
High-speed power training: A novel approach to resistance training in older men and women. A brief review and pilot study	2007	PUBMED	Tipo de estudo inadequado (não é ECR)
Therapeutic validity and replicability of power training interventions in older adults: A review using the TIDieR checklist and CONTENT scale	2024	SCOPUS	Tipo de estudo inadequado (não é ECR); Desfechos de interesse não mencionados
Chronic Effects of Different Intensities of Power Training on Neuromuscular Parameters in Older People: A Systematic Review with Meta-analysis	2023	SCOPUS	Tipo de estudo inadequado (não é ECR); Faixa etária não está claramente especificada; Desfechos de interesse não mencionados
Effects of Plyometric Jump Training on the Reactive Strength Index in Healthy Individuals Across the Lifespan: A Systematic Review with Meta-analysis	2023	SCOPUS	Tipo de estudo inadequado (não é ECR); Faixa etária não está claramente especificada; Desfechos de interesse não mencionados
Exercise to treat psychopathology and other clinical outcomes in schizophrenia: A systematic review and meta-analysis	2023	SCOPUS	Tipo de estudo inadequado (não é ECR); Faixa etária não está claramente especificada; Intervenção não é treinamento de saltos; Desfechos de interesse não mencionados
Effectiveness of power training compared to strength training in older adults: a systematic review and meta-analysis	2022	SCOPUS	Tipo de estudo inadequado (não é ECR); Desfechos de interesse não mencionados
Effect of Plyometric Jump Training on Skeletal Muscle Hypertrophy in Healthy Individuals: A Systematic Review With Multilevel Meta-Analysis	2022	SCOPUS	Tipo de estudo inadequado (não é ECR); Faixa etária não está claramente especificada; Desfechos de interesse não mencionados
The effect of the stretch-shortening cycle in the force-velocity velocity relationship and its association with physical function in older adults with COPD	2019	SCOPUS	Metodologia não especifica claramente se é ECR; Intervenção não é treinamento de saltos; Desfechos de interesse não mencionados
The effects of high- versus low-intensity power training on muscle power outcomes in healthy, older adults: A systematic review	2019	SCOPUS	Tipo de estudo inadequado (não é ECR); Desfechos de interesse não mencionados
Mechanical, hormonal, and hypertrophic adaptations to 10weeks of eccentric and stretch-shortening cycle exercise training in old males	2014	SCOPUS	Metodologia não especifica claramente se é ECR; Faixa etária não está claramente especificada; Intervenção não é treinamento de saltos; Desfechos de interesse não mencionados
Strength training with stretch-shortening cycle exercises optimizes neuromuscular economy during functional tasks in elderly women	2014	SCOPUS	Metodologia não especifica claramente se é ECR; Intervenção não é treinamento de saltos; Desfechos de interesse não mencionados
Is power training or conventional resistance training better for function in elderly persons? A meta-analysis	2011	SCOPUS	Tipo de estudo inadequado (não é ECR); Desfechos de interesse não mencionados
The effects of strength and power training on single-step balance recovery in older adults: apreliminary study	2017	PUBMED	Metodologia não especifica claramente se é ECR; Faixa etária não está claramente especificada; Intervenção não é treinamento de saltos; Desfechos de interesse não mencionados
Effects of a Targeted Multimodal Exercise Program Incorporating High‐Speed Power Training	2014	PUBMED	Metodologia não especifica claramente se é ECR; Faixa etária não está claramente especificada; Intervenção não é treinamento de saltos; Desfechos de interesse não mencionados
Weighted vest exercise improves indices of fall risk in older women	1998	PUBMED	Metodologia não especifica claramente se é ECR; Faixa etária não está claramente especificada; Intervenção não é treinamento de saltos; Desfechos de interesse não mencionados
Lower Extremity Muscle Function AfterStrength or Power Training in Older Adults	2009	PUBMED	Metodologia não especifica claramente se é ECR; Faixa etária não está claramente especificada; Intervenção não é treinamento de saltos; Desfechos de interesse não mencionados
Effectiveness of dual-task functional power training for preventing falls in older people:protocol for a cluster randomised controlled trial	2015	PUBMED	Metodologia não especifica claramente se é ECR; Faixa etária não está claramente especificada; Intervenção não é treinamento de saltos; Desfechos de interesse não mencionados
Power training using pneumatic machines vs. plate-loaded machines to improve muscle power in older adults	2017	PUBMED	Metodologia não especifica claramente se é ECR; Faixa etária não está claramente especificada; Intervenção não é treinamento de saltos; Desfechos de interesse não mencionados
PowerTrainingPrescriptioninOlderIndividualsIsItSafeandEffectivetoPromoteNeuromuscularFunctionalImprovements	2018	PUBMED	Metodologia não especifica claramente se é ECR; Faixa etária não está claramente especificada; Intervenção não é treinamento de saltos; Desfechos de interesse não mencionados
The Effect of a Single Session of Plyometric Training Per Week on Fitness Parameters in Professional Female Soccer Players: a Randomized Controlled Trial	2022	COCHRANE	População inclui participantes < 60 anos sem dados separados; Desfechos de interesse não mencionados
The Role of Instability with Plyometric Training in Sub-elite Adolescent Soccer Players	2015	COCHRANE	Metodologia não especifica claramente se é ECR; População inclui participantes < 60 anos sem dados separados
Stretch-shortening cycle exercises can efficiently optimize gait-symmetry and balance capabilities in children with unilateral cerebral palsy: a randomized controlled trial	2021	COCHRANE	Faixa etária não está claramente especificada; Intervenção não é treinamento de saltos; Desfechos de interesse não mencionados
Kinematics analyses related to stretch-shortening cycle during soccer instep kicking after different acute stretching	2012	COCHRANE	Metodologia não especifica claramente se é ECR; Intervenção não é treinamento de saltos; Desfechos de interesse não mencionados
A Plyometric Warm-Up Protocol Improves Running Economy in Recreational Endurance Athletes	2020	COCHRANE	Metodologia não especifica claramente se é ECR; População inclui participantes < 60 anos sem dados separados; Desfechos de interesse não mencionados
Effect of Plyometric Jump Training on Skeletal Muscle Hypertrophy in Healthy Individuals: A Systematic Review With Multilevel Meta-Analysis	2022	WEB_OF_SCIENCE	Tipo de estudo inadequado (não é ECR); Faixa etária não está claramente especificada; Desfechos de interesse não mencionados
Effects of Plyometric Jump Training on Physical Fitness in Amateur and Professional Volleyball: A Meta-Analysis	2021	WEB_OF_SCIENCE	Tipo de estudo inadequado (não é ECR)
Effects of Maturation Stage on Sprinting Speed Adaptations to Plyometric Jump Training in Youth Male Team Sports Players: A Systematic Review and Meta-Analysis	2022	WEB_OF_SCIENCE	Tipo de estudo inadequado (não é ECR); Desfechos de interesse não mencionados
Plyometric-Jump Training Effects on Physical Fitness and Sport-Specific Performance According to Maturity: A Systematic Review with Meta-analysis	2023	WEB_OF_SCIENCE	Tipo de estudo inadequado (não é ECR)
Effects of Plyometric Jump Training on Electromyographic Activity and Its Relationship to Strength and Jump Performance in Healthy Trained and Untrained Populations: A Systematic Review of Randomized Controlled Trials	2021	WEB_OF_SCIENCE	Tipo de estudo inadequado (não é ECR)
Effects of Therapies Involving Plyometric-Jump Training on Physical Fitness of Youth with Cerebral Palsy: A Systematic Review with Meta-Analysis	2024	WEB_OF_SCIENCE	Tipo de estudo inadequado (não é ECR)
Plyometric Jump Training Effects on Maximal Strength in Soccer Players: A Systematic Review with Meta-analysis of Randomized-Controlled Studies	2024	WEB_OF_SCIENCE	Tipo de estudo inadequado (não é ECR); Desfechos de interesse não mencionados
Effects of Plyometric Jump Training on Measures of Physical Fitness and Sport-Specific Performance of Water Sports Athletes: A Systematic Review with Meta-analysis	2022	WEB_OF_SCIENCE	Tipo de estudo inadequado (não é ECR)
Methodological considerations for determining the volume and intensity of drop jump training. A systematic, critical and prepositive review	2023	WEB_OF_SCIENCE	Tipo de estudo inadequado (não é ECR)
INFLUENCE OF MATURATION STAGE ON AGILITY PERFORMANCE GAINS AFTER PLYOMETRIC TRAINING: A SYSTEMATIC REVIEW AND META-ANALYSIS	2017	WEB_OF_SCIENCE	Tipo de estudo inadequado (não é ECR); Desfechos de interesse não mencionados
The Effect of Combined Strength, Plyometric, and Sprint Training on Repeated Sprint Ability in Team-Sport Athletes: A Systematic Review and Meta-Analysis	2024	WEB_OF_SCIENCE	Tipo de estudo inadequado (não é ECR); Desfechos de interesse não mencionados
Effects of Strength and Plyometric Training on Vertical Jump, Linear Sprint, and Change-of-Direction Speed in Female Adolescent Team Sport Athletes: A Systematic Review and Meta-Analysis	2025	WEB_OF_SCIENCE	Tipo de estudo inadequado (não é ECR); Desfechos de interesse não mencionados
Effect of Plyometric Exercises of Lower Limb on Strength, Postural Control, and Risk of Falling in Stroke Patients	2025	EMBASE	Desenho do estudo não é ECR (revisão, observacional, etc.); Idade da população não está clara
The Impact of Power Training on Muscle Power, Physical Performance, and Physical Functioning in Older Adults: A Descriptive Case Series	2025	EMBASE	Desenho do estudo não está claro no título/resumo
Effects of Functional Power Training on Mobility and Gait Parameters in Children With Cerebral Palsy.	2024	EMBASE	Desenho do estudo não é ECR (revisão, observacional, etc.)
Effect and feasibility of the combination of branched chain amino acid and exercise therapy on muscle mass and echo intensity of muscle in orthopedic patients in a convalescent rehabilitation hospital: A crossover trial	2023	EMBASE	Desenho do estudo não está claro no título/resumo; Idade da população não está clara
The Effect of Plyometric Training on the Balance Ability of the Lower Limbs in the Elderly	2023	EMBASE	Desenho do estudo não é ECR (revisão, observacional, etc.)
Exploration of the Effectiveness and Feasibility of a Personalized Power Training Program for Youth with Cerebral Palsy Provided Through a Community-tertiary Hospital Partnership	2023	EMBASE	Desenho do estudo não é ECR (revisão, observacional, etc.)
Respiratory Muscle Function After Hospitalisation for COVID-19 -Pathophysiological Model on Severity, Determinants and Clinical Consequences of Respiratory Muscle Strength Impairment in Patients Who Had Been Hospitalised for COVID-19-	2021	EMBASE	Desenho do estudo não está claro no título/resumo; Idade da população não está clara
Effects of Self-selected Resistance Training on Physical Fitness and Psychophysiological Responses in Physically Inactive Older Women: A Randomized Controlled Study	2021	EMBASE	Atende todos os critérios de elegibilidade
Power Training in Older Adults with Knee Osteoarthritis	2021	EMBASE	Desenho do estudo não é ECR (revisão, observacional, etc.)
Effects of a Power Training at Two Different Loads on Muscle Quality and Functional Capacity in Women Aged 65-75.	2020	EMBASE	Desenho do estudo não é ECR (revisão, observacional, etc.)
Novel individualized power training protocol preserves physical function in adult and older mice	2019	EMBASE	Desenho do estudo não é ECR (revisão, observacional, etc.)
Exercise and dietary-protein as a countermeasure to skeletal muscle weakness: Liverpool Hope University - Sarcopenia aging trial (LHU-SAT)	2019	EMBASE	Atende todos os critérios de elegibilidade
Feasibility of Ballistic Strength Training in Subacute Stroke: A Randomized, Controlled, Assessor-Blinded Pilot Study	2018	EMBASE	População não inclui idosos (idade < 60 anos)
Higher muscle power training volume is not determinant for the magnitude of neuromuscular improvements in elderly women	2018	EMBASE	Desenho do estudo não é ECR (revisão, observacional, etc.)
The effect of 10-week plyometric training program on muscle strength of the upper and lower limbs, lean body mass, and insulin-like growth factor 1 in young women	2017	EMBASE	Desenho do estudo não é ECR (revisão, observacional, etc.)
Power Training-induced Increases in Muscle Activation during Gait in Old Adults	2017	EMBASE	Desenho do estudo não é ECR (revisão, observacional, etc.)
Ballistic strength training compared with usual care for improving mobility following traumatic brain injury: protocol for a randomised, controlled trial	2016	EMBASE	Atende todos os critérios de elegibilidade
Preoperative progressive explosive-type resistance training is feasible and effective in patients with hip osteoarthritis scheduled for total hip arthroplasty - a randomized controlled trial	2016	EMBASE	Atende todos os critérios de elegibilidade
Power training induced change in bradykinesia and muscle power in Parkinson's disease	2016	EMBASE	Atende todos os critérios de elegibilidade
Physical exercise and sarcopenia in older people: Position paper of the Italian Society of Orthopaedics and Medicine (OrtoMed)	2014	EMBASE	Desenho do estudo não está claro no título/resumo
Power training and postmenopausal hormone therapy affect transcriptional control of specific co-regulated gene clusters in skeletal muscle	2010	EMBASE	Atende todos os critérios de elegibilidade
Plyometric training versus resistive exercises after acute lateral ankle sprain	2010	EMBASE	Desenho do estudo não é ECR (revisão, observacional, etc.)
The effects of muscle strength and power training on mobility among older hip fracture patients	2008	EMBASE	Atende todos os critérios de elegibilidade
Berney S, Hopkins RO, Rose JW, Koopman R, Puthucheary Z, Pastva A, Gordon I, Colantuoni E, Parry SM, Needham DM, Denehy L	2021	EMBASE	Desenho do estudo não está claro no título/resumo; Idade da população não está clara; Desfechos de interesse não estão claros
Travier N, Velthuis MJ, Steins Bisschop CN, van den Buijs B, Monninkhof EM, Backx F, Los M, Erdkamp F, Bloemendal HJ, Rodenhuis C, de Roos MA, Verhaar M, ten Bokkel Huinink D, van der Wall E, Peeters PH, May AM	2015	EMBASE	Desenho do estudo não está claro no título/resumo; Idade da população não está clara; Desfechos de interesse não estão claros
Rodriguez SL, Hopman WM, ten Hove MW	2012	EMBASE	Desenho do estudo não está claro no título/resumo; Idade da população não está clara; Desfechos de interesse não estão claros
Association Between Reactive Strength Index and Metabolic Cost of Running in Male Master Athletes	2025	SCOPUS	Desenho do estudo não está claro no título/resumo; Idade da população não está clara; Desfechos de interesse não estão claros
Relationship between reactive strength and leg stiffness at submaximal velocity: Effects of age on distance runners	2021	SCOPUS	Desenho do estudo não está claro no título/resumo; Idade da população não está clara; Desfechos de interesse não estão claros
Efficacy of the Pilates versus general exercises versus educational workshops on neuromuscular parameters: A randomized controlled trial	2021	SCOPUS	Idade da população não está clara; Desfechos de interesse não estão claros
Evaluation of psychophysical factors in individuals with frailty syndrome following a 3-month controlled physical activity program	2020	SCOPUS	Desenho do estudo não está claro no título/resumo; Idade da população não está clara; Desfechos de interesse não estão claros
Results from the randomized controlled IHOPE trial suggest no effects of oral protein supplementation and exercise training on physical function in hemodialysis patients	2019	SCOPUS	Idade da população não está clara; Desfechos de interesse não estão claros
Exercise and dietary-protein as a countermeasure to skeletal muscle weakness: Liverpool Hope University - Sarcopenia aging trial (LHU-SAT)	2019	SCOPUS	Desenho do estudo não está claro no título/resumo; Desfechos de interesse não estão claros
Feasibility of Ballistic Strength Training in Subacute Stroke: A Randomized, Controlled, Assessor-Blinded Pilot Study	2018	SCOPUS	Idade da população não está clara; Desfechos de interesse não estão claros
Skeletal muscle strength after orthopic heart transplantation Kraftstatus der skelettmuskulatur nach orthotoper herztransplantation	1999	SCOPUS	Desenho do estudo não está claro no título/resumo; Idade da população não está clara; Desfechos de interesse não estão claros
Fastandballisticcontractionsinvolvegreaterneuromuscularpowerproduction		EMBASE	Desenho do estudo não está claro no título/resumo; Idade da população não está clara; Desfechos de interesse não estão claros
ImpactoftheHOP UP PTprogramonolderadultsatrisktofall		EMBASE	Desenho do estudo não está claro no título/resumo; Desfechos de interesse não estão claros
Plyometric Exercise With Obese Children	2021	PUBMED	Desenho do estudo não está claro no título/resumo; População não inclui idosos (idade < 60 anos); Desfechos de interesse não estão claros
Does 8 Weeks of Integrated Functional Core and Plyometric Training Improve Postural Control Performance in Young Rhythmic Gymnasts?	2022	PUBMED	Desenho do estudo não está claro no título/resumo; População não inclui idosos (idade < 60 anos)
Effects of Different Acute Plyometric Training Intensities on Attention and Psychological States	2022	PUBMED	Desenho do estudo não está claro no título/resumo
Improving neuromuscular performance in young basketball players: plyometric vs. technique training	2015	PUBMED	Desenho do estudo não é ECR (revisão, observacional, etc.); População não inclui idosos (idade < 60 anos)
Kinetics and Vertical Stiffness of Female Volleyball Players: effect of Low-Intensity Plyometric Training	2022	PUBMED	Desenho do estudo não está claro no título/resumo
High-Intensity Forward-Backward Plyometrics After the Warm-Up Entail Better Sprint and Change-of-Direction Performance Than Low-Intensity Side-to-Side Plyometrics	2024	PUBMED	População não inclui idosos (idade < 60 anos); Desfechos de interesse não estão claros
Plyometric Training Improves Not Only Measures of Linear Speed, Power, and Change-of-Direction Speed But Also Repeated Sprint Ability in Young Female Handball Players	2021	PUBMED	Desenho do estudo não está claro no título/resumo; População não inclui idosos (idade < 60 anos)
The Effect of Varying Plyometric Volume on Stretch-Shortening Cycle Capability in Collegiate Male Rugby Players	2019	PUBMED	Atende todos os critérios de elegibilidade
The Effects of an Eight-Week Integrated Functional Core and Plyometric Training Program on Young Rhythmic Gymnasts' Explosive Strength	2023	PUBMED	Desenho do estudo não está claro no título/resumo; População não inclui idosos (idade < 60 anos)
THE EFFECTS OF ASSISTED AND RESISTED PLYOMETRIC TRAINING ON JUMP HEIGHT AND SPRINT PERFORMANCE AMONG PHYSICALLY ACTIVE FEMALES	2022	PUBMED	Desenho do estudo não está claro no título/resumo; População não inclui idosos (idade < 60 anos)
Effects of Isometric Strength and Plyometric Training on Running Performance: a Randomized Controlled Study	2023	PUBMED	Atende todos os critérios de elegibilidade
Effect of weekly Plyometric training frequency on Adolescents female basketball players during in-season: a comparison of two vs. four sessions	2025	PUBMED	População não inclui idosos (idade < 60 anos)
The effects of footwear on dynamic stability and impact loading in jump landing	2025	PUBMED	Desenho do estudo não está claro no título/resumo
The effects of plyometric exercises on mood in premenopausal women	2015	PUBMED	Desenho do estudo não é ECR (revisão, observacional, etc.); População não inclui idosos (idade < 60 anos); Desfechos de interesse não estão claros
EFFECT OF MENTAL IMAGERY VERSUS PLYOMETRIC EXERCISES IN BASKETBALL PLAYERS	2022	PUBMED	Desenho do estudo não está claro no título/resumo; População não inclui idosos (idade < 60 anos)
Effects of Maturation on Physical Fitness Adaptations to Plyometric Drop Jump Training in Male Youth Soccer Players	2020	PUBMED	Desenho do estudo não é ECR (revisão, observacional, etc.); Desfechos de interesse não estão claros
Effects of Plyometric Exercises in Female Fast Bowlers	2024	COCHRANE	População não inclui idosos (idade < 60 anos)
Kinetic and Kinematic Changes in Vertical Jump in Prepubescent Girls After 10 Weeks of Plyometric Training	2020	COCHRANE	Desenho do estudo não é ECR (revisão, observacional, etc.)
Changes in Sprint and Jump Performances After Traditional, Plyometric, and Combined Resistance Training in Male Youth Pre- and Post-Peak Height Velocity	2016	COCHRANE	Desenho do estudo não é ECR (revisão, observacional, etc.)
The effects of strength vs. plyometric training on sprinting kinetics in post peak height velocity (PHV) female athletes	2024	COCHRANE	Desenho do estudo não é ECR (revisão, observacional, etc.)
The Effect of Plyometric Training Volume on Athletic Performance in Prepubertal Male Soccer Players	2017	COCHRANE	Desenho do estudo não é ECR (revisão, observacional, etc.); Desfechos de interesse não estão claros
The effects of jump training on measures of physical performance, lower extremities injury incidence and burden in highly trained male soccer players	2024	COCHRANE	Desenho do estudo não é ECR (revisão, observacional, etc.); População não inclui idosos (idade < 60 anos)
A Comparison of the Effects of Short-Term Plyometric and Resistance Training on Lower-Body Muscular Performance	2018	COCHRANE	Desenho do estudo não é ECR (revisão, observacional, etc.); Desfechos de interesse não estão claros
Effects of Progressed and Nonprogressed Volume-Based Overload Plyometric Training on Components of Physical Fitness and Body Composition Variables in Youth Male Basketball Players	2021	COCHRANE	Desenho do estudo não é ECR (revisão, observacional, etc.); População não inclui idosos (idade < 60 anos); Desfechos de interesse não estão claros
Effect of Strength vs. Plyometric Training upon Change of Direction Performance in Young Female Handball Players	2022	COCHRANE	Atende todos os critérios de elegibilidade
The Effects of Plyometric Jump Training on Jumping and Swimming Performances in Prepubertal Male Swimmers	2019	COCHRANE	Desenho do estudo não está claro no título/resumo; População não inclui idosos (idade < 60 anos)
Effects of an In-season Plyometric Training Program on Repeated Change of Direction and Sprint Performance in the Junior Soccer Player	2016	COCHRANE	Desenho do estudo não está claro no título/resumo; População não inclui idosos (idade < 60 anos); Desfechos de interesse não estão claros
A randomised controlled trial of 1- versus 2-day per week formats of Nordic hamstring training on explosive athletic tasks in prepubertal soccer players	2022	COCHRANE	População não inclui idosos (idade < 60 anos); Desfechos de interesse não estão claros
Comparative effects of single vs. double weekly plyometric training sessions on jump, sprint and change of directions abilities of elite youth football players	2019	COCHRANE	População não inclui idosos (idade < 60 anos); Desfechos de interesse não estão claros
Improving the Q: h strength ratio in women using plyometric exercises	2011	COCHRANE	Desenho do estudo não está claro no título/resumo; População não inclui idosos (idade < 60 anos)
Effects of short-term in-season plyometric training in adolescent female basketball players	2019	COCHRANE	População não inclui idosos (idade < 60 anos)
Influence of force-vector and force application plyometric training in young elite basketball players	2019	COCHRANE	População não inclui idosos (idade < 60 anos)
Improvement of Repeated-Sprint Ability and Horizontal-Jumping Performance in Elite Young Basketball Players With Low-Volume Repeated-Maximal-Power Training	2016	COCHRANE	Desenho do estudo não é ECR (revisão, observacional, etc.); População não inclui idosos (idade < 60 anos); Desfechos de interesse não estão claros
Effects of Plyometric Training on Neuromuscular Performance in Youth Basketball Players: a Pilot Study on the Influence of Drill Randomization	2018	COCHRANE	Desenho do estudo não é ECR (revisão, observacional, etc.); População não inclui idosos (idade < 60 anos); Desfechos de interesse não estão claros
Effects of Unilateral, Bilateral and Combined Plyometric Jump Training on Asymmetry of Muscular Strength and Power, and Change-of-Direction in Youth Male Basketball Players	2024	COCHRANE	População não inclui idosos (idade < 60 anos)
Accentuated Eccentric Loading in Countermovement Jumps Vs. Drop Jumps: effects on Jump Performance and Strength in A Randomized Controlled Trial	2025	COCHRANE	Atende todos os critérios de elegibilidade
Efficacy of plyometric exercises on upper extremity function, selective motor control and hand grip strength in children with unilateral cerebral palsy: a randomized controlled study	2024	COCHRANE	População não inclui idosos (idade < 60 anos); Desfechos de interesse não estão claros
My Coach Says: the Effects of Accelerated Eccentric and Landing Cues to Elicit Change in Countermovement Jump Propulsive and Landing Performance	2025	COCHRANE	População não inclui idosos (idade < 60 anos)
Effects of Plyometric Training Volume on Physical Performance in Youth Basketball Players	2024	COCHRANE	População não inclui idosos (idade < 60 anos)
Vertical- vs. Horizontal-Oriented Drop Jump Training: chronic Effects on Explosive Performances of Elite Handball Players	2017	COCHRANE	Desenho do estudo não é ECR (revisão, observacional, etc.); População não inclui idosos (idade < 60 anos)
Effects of Equal Volume But Different Plyometric Jump Training Intensities on Components of Physical Fitness in Physically Active Young Males	2021	COCHRANE	População não inclui idosos (idade < 60 anos)
Evaluating the Effects of Consecutive Phases of Plyometric Jump Training on Athletic Performance in Male Soccer Players: the Effect of Training Frequency and Volume Manipulations	2024	COCHRANE	População não inclui idosos (idade < 60 anos); Desfechos de interesse não estão claros
The Acute Effects of Milk Consumption on Systemic Inflammation after Combined Resistance and Plyometric Exercise in Young Adult Females	2022	COCHRANE	População não inclui idosos (idade < 60 anos); Desfechos de interesse não estão claros
Bipedal hopping timed to a metronome to detect impairments in anticipatory motor control in people with mild multiple sclerosis	2018	COCHRANE	Desenho do estudo não está claro no título/resumo; Desfechos de interesse não estão claros
Effect of plyometric exercise training on functional performance and muscle strenght in adolescent volleyball players	2015	COCHRANE	Desenho do estudo não está claro no título/resumo; População não inclui idosos (idade < 60 anos)

## Sheet: 5_Selecionados_Finais
#	Título	Autores	Ano	Fonte	Decisão	Justificativa	PDF
1	Effects of 12-week power training on bone in mobility-limited older adults: randomised controlled trial		2025	PUBMED	INCLUÍDO	MENCIONA HAVER GRUPO CONTROLE, POPULAÇÃO E DESFECHO	SIM
3	Influence of strength and power training on the rate of force development, peak force and functional mobility in elderly people with Parkinson's disease: a randomized controlled trial		2025	PUBMED	INCLUÍDO	MENCIONA HAVER GRUPO CONTROLE, POPULAÇÃO E DESFECHO	SIM
4	Effect of power training on function and body composition in older women with probable sarcopenia. A study protocol for a randomized controlled trial		2025	PUBMED	INCLUÍDO	MENCIONA HAVER GRUPO CONTROLE, POPULAÇÃO E DESFECHO	SIM
6	Effect of lower-extremity muscle power training on muscle strength, balance function and walking ability in older adults with heart failure: a randomized controlled trial		2024	PUBMED	INCLUÍDO	MENCIONA HAVER GRUPO CONTROLE, POPULAÇÃO E DESFECHO	SIM
7	The Effects of Power Training Frequency on Muscle Power and Functional Performance in Older Women: A Randomized Controlled Trial		2023	PUBMED	INCLUÍDO	MENCIONA HAVER GRUPO CONTROLE, POPULAÇÃO E DESFECHO	SIM
9	Effectiveness of Power Training Compared With Non-specific Exercises on Functionality and Body Composition in Women Older Than 65 Years With Probable Sarcopenia.		2023	PUBMED	INCLUÍDO	MENCIONA HAVER GRUPO CONTROLE, POPULAÇÃO E DESFECHO	SIM
11	Effect of High-Intensity Power Training on Cognitive Function in Older Adults With Type 2 Diabetes: Secondary Outcomes of the GREAT2DO Study		2022	PUBMED	INCLUÍDO	MENCIONA HAVER GRUPO CONTROLE, POPULAÇÃO E DESFECHO	SIM
13	Effectiveness of Community-Delivered Functional Power Training Program for Frail and Pre-frail Community-Dwelling Older Adults: a Randomized Controlled Study		2021	PUBMED	INCLUÍDO	MENCIONA HAVER GRUPO CONTROLE, POPULAÇÃO E DESFECHO	SIM
14	Effects of slow- v. fast-digested protein supplementation combined with mixed power training on muscle function and functional capacities in older men		2021	PUBMED	INCLUÍDO	MENCIONA HAVER GRUPO CONTROLE, POPULAÇÃO E DESFECHO	SIM
16	Postexercise Hypotension After Muscle Power Training Session in Older Adults With Hypertension		2020	PUBMED	INCLUÍDO	MENCIONA HAVER GRUPO CONTROLE, POPULAÇÃO E DESFECHO	SIM
18	Effectiveness of resistance and jump training or machine-based isometric training for middle-aged and older men with osteopenia and osteoporosis: LIFTMOR for men trial preliminary findings Pr-e print		2019	PUBMED	INCLUÍDO	MENCIONA HAVER GRUPO CONTROLE, POPULAÇÃO E DESFECHO	SIM
22	Changes in muscle quality following 12 weeks of power training in mobility-limited older adults: A randomized controlled trial		2017	PUBMED	INCLUÍDO	MENCIONA HAVER GRUPO CONTROLE, POPULAÇÃO E DESFECHO	SIM
23	Power training using pneumatic machines vs. plate-loaded machines to improve muscle power in older adults		2017	PUBMED	INCLUÍDO	MENCIONA HAVER GRUPO CONTROLE, POPULAÇÃO E DESFECHO	SIM
26	Voluntary muscle activation improves with power training and is associated with changes in gait speed in mobility-limited older adults - A randomized controlled trial		2016	PUBMED	INCLUÍDO	MENCIONA HAVER GRUPO CONTROLE, POPULAÇÃO E DESFECHO	SIM
27	Effect of traditional resistance and power training using rated perceived exertion for enhancement of muscle strength, power, and functional performance		2016	PUBMED	INCLUÍDO	MENCIONA HAVER GRUPO CONTROLE, POPULAÇÃO E DESFECHO	SIM
29	Effectiveness of dual-task functional power training for preventing falls in older people: Study protocol for a cluster randomised controlled trial		2015	PUBMED	INCLUÍDO	MENCIONA HAVER GRUPO CONTROLE, POPULAÇÃO E DESFECHO	SIM
30	Comparative effects of light or heavy resistance power training for improving lower extremity power and physical performance in mobility-limited older adults		2015	PUBMED	INCLUÍDO	MENCIONA HAVER GRUPO CONTROLE, POPULAÇÃO E DESFECHO	SIM
31	The effects of strength and power training on single-step balance recovery in older adults: A preliminary study		2014	PUBMED	INCLUÍDO	MENCIONA HAVER GRUPO CONTROLE, POPULAÇÃO E DESFECHO	SIM
33	High-speed power training in older adults: A shift of the external resistance at which peak power is produced		2014	EMBASE	INCLUÍDO	MENCIONA HAVER GRUPO CONTROLE, POPULAÇÃO E DESFECHO	SIM
34	Effects of a targeted multimodal exercise program incorporating high-speed power training on falls and fracture risk factors in older adults: A community-based randomized controlled trial		2014	PUBMED	INCLUÍDO	MENCIONA HAVER GRUPO CONTROLE, POPULAÇÃO E DESFECHO	SIM
35	Oxidative stress responses to a graded maximal exercise test in older adults following explosive-type resistance training		2014	EMBASE	INCLUÍDO	MENCIONA HAVER GRUPO CONTROLE, POPULAÇÃO E DESFECHO	SIM
36	Multicomponent exercises including muscle power training enhance muscle mass, power output, and functional outcomes in institutionalized frail nonagenarians		2014	EMBASE	INCLUÍDO	MENCIONA HAVER GRUPO CONTROLE, POPULAÇÃO E DESFECHO	SIM
37	Residual effects of muscle strength and muscle power training and detraining on physical function in community-dwelling prefrail older adults: a randomized controlled trial.		2012	EMBASE	INCLUÍDO	MENCIONA HAVER GRUPO CONTROLE, POPULAÇÃO E DESFECHO	SIM
38	Effects of strength training versus power training on physical performance in prefrail community-dwelling older adults		2012	EMBASE	INCLUÍDO	MENCIONA HAVER GRUPO CONTROLE, POPULAÇÃO E DESFECHO	SIM
39	High velocity power training with weight-bearing and balance exercises improves bone density and function in high risk older adults: A 12-month RCT		2011	EMBASE	INCLUÍDO	MENCIONA HAVER GRUPO CONTROLE, POPULAÇÃO E DESFECHO	SIM
40	The Effect of High-speed Power Training on Muscle Performance, Function and Pain in Older Adults With Knee OA		2011	EMBASE	INCLUÍDO	MENCIONA HAVER GRUPO CONTROLE, POPULAÇÃO E DESFECHO	SIM
41	A comparison of high-speed power training and traditional slow-speed resistance training in older men and women.		2010	EMBASE	INCLUÍDO	MENCIONA HAVER GRUPO CONTROLE, POPULAÇÃO E DESFECHO	SIM
42	Lower extremity muscle function after strength or power training in older adults		2009	EMBASE	INCLUÍDO	MENCIONA HAVER GRUPO CONTROLE, POPULAÇÃO E DESFECHO	SIM
43	Lower extremity power training in elderly subjects with mobility limitations: A randomized controlled trial		2008	EMBASE	INCLUÍDO	MENCIONA HAVER GRUPO CONTROLE, POPULAÇÃO E DESFECHO	SIM
44	Power training improves balance in healthy older adults		2006	EMBASE	INCLUÍDO	MENCIONA HAVER GRUPO CONTROLE, POPULAÇÃO E DESFECHO	SIM
46	Higher muscle power training volume is not determinant for the magnitude of neuromuscular improvements in elderly women		2018	EMBASE	INCLUÍDO	ATENÇÃO: Grupo controle não está claramente mencionado; Estudo atende todos os critérios de elegibilidade PICO	SIM
49	An age-adapted plyometric exercise program improves dynamic strength, jump performance and functional capacity in older men either similarly or more than traditional resistance training		2020	COCHRANE	INCLUÍDO	MENCIONA HAVER GRUPO CONTROLE, POPULAÇÃO E DESFECHO	SIM
50	Plyometric Exercise For Quality Of Sleep And Wellbeing Of The Elderly		2022	COCHRANE	INCLUÍDO	MENCIONA HAVER GRUPO CONTROLE, POPULAÇÃO E DESFECHO	SIM
54	Improving Power Output in Older Adults Using Plyometrics in a Body Mass-Supported Treadmill		2018	COCHRANE	INCLUÍDO	MENCIONA HAVER GRUPO CONTROLE, POPULAÇÃO E DESFECHO	SIM

## Sheet: Estudos selecionados
Artigo	Autor/Ano	Título	Desenho Metodológico	Objetivo Primário
1	Caserotti et al. (2008)	Changes in power and force generation during coupled eccentric–concentric versus concentric muscle contraction with training and aging	Ensaio Clínico Randomizado (RCT)	Examinar as diferenças na potência muscular, força e padrão de movimento durante a contração concêntrica isolada e acoplada excêntrica-concêntrica antes e depois de 36 semanas de treinamento multicomponente em idosos
2	Karinkanta et al. (2015)	Combined resistance and balance-jumping exercise reduces older women’s injurious falls and fractures: 5-year follow-up study	Ensaio Clínico Randomizado (RCT) com 5 anos de seguimento	Avaliar se a intervenção de exercício (COMB) teve efeitos duradouros na redução de quedas com lesões e fraturas em mulheres idosas
3	Park et al. (2012)	Effect of Jumping Exercise on Muscle Strength and Balance of Elderly People: a Randomized Controlled Trial	Ensaio Clínico Randomizado (RCT)	Investigar o efeito do exercício de salto na força muscular e equilíbrio de idosos
4	Allison et al. (2018)	High and odd impact exercise training improved physical function and fall risk factors in community-dwelling older men	Ensaio Clínico Randomizado (RCT)	Investigar a influência do exercício de alto impacto no equilíbrio, função muscular e morfologia em homens idosos
5	Piirainen et al. (2014)	Effects of plyometric and pneumatic explosive strength training on neuromuscular function and dynamic balance control in 60–70 year old males	Ensaio Clínico Randomizado (RCT)	Comparar as adaptações neuromusculares ao treinamento de potência pliométrico (PLY) ou pneumático (PNE) de 12 semanas e seus efeitos no controle do equilíbrio dinâmico em homens de 60 a 70 anos
6	Gianoudis et al. (2014)	Effects of a Targeted Multimodal Exercise Program Incorporating High-Speed Power Training on Falls and Fracture Risk Factors in Older Adults: A Community-Based Randomized Controlled Trial	Ensaio Clínico Randomizado (RCT)	Avaliar a eficácia e viabilidade de um programa de exercício multimodal incorporando Treinamento de Resistência Progressiva de Alta Velocidade (HV-PRT) em adultos mais velhos
7	Van Roie et al. (2020)	An age-adapted plyometric exercise program improves dynamic strength, jump performance and functional capacity in older men either similarly or more than traditional resistance training	Ensaio Clínico Randomizado (RCT)	Comparar os efeitos do exercício pliométrico (PLYO) na potência, produção de força, salto e desempenho funcional com o treinamento de resistência tradicional (RT) e caminhada (WALK) em homens idosos
8	Zubac et al. (2019)	Plyometric exercise improves jumping performance and skeletal muscle contractile properties in seniors	Ensaio Clínico Randomizado (RCT)	Investigar os efeitos de uma sessão de treinamento pliométrico (PT) de 8 semanas na altura do salto com contramovimento (CMJ), velocidade de decolagem e parâmetros contráteis derivados da Tensiomiografia (TMG) em idosos
9	Ramírez-Campillo et al. (2016)	High-Speed Resistance Training in Older Women: The Role of Supervision	Ensaio Clínico Randomizado (RCT)	Comparar os efeitos de dois métodos de supervisão (alta vs. baixa) no Treinamento de Resistência de Alta Velocidade (HS-RT) na capacidade funcional, desempenho neuromuscular e qualidade de vida em mulheres idosas

## Sheet: Tabela 1 Picot
TABELA 1. CARACTERISTICAS DOS ESTUDOS
						Tipo de Intervenção
Artigo	Autor/Ano	Título	Desenho Metodológico	Objetivo Primário	N	Intervenção (GI)	Intervenção (GC)	Resultados
1	Caserotti et al. (2008)	Changes in power and force generation during coupled eccentric–concentric versus concentric muscle contraction with training and aging	Ensaio Clínico Randomizado (RCT)	Examinar as diferenças na potência muscular, força e padrão de movimento durante a contração concêntrica isolada e acoplada excêntrica-concêntrica antes e depois de 36 semanas de treinamento multicomponente em idosos	44	Treinamento multicomponente (aeróbico, força, equilíbrio, flexibilidade e coordenação)	Grupo Controle (sem intervenção)	O treinamento de longo prazo neutralizou o declínio da potência muscular e desempenho funcional relacionado à idade. Ganhos substanciais no desempenho muscular no grupo treinado.
2	Karinkanta et al. (2015)	Combined resistance and balance-jumping exercise reduces older women’s injurious falls and fractures: 5-year follow-up study	Ensaio Clínico Randomizado (RCT) com 5 anos de seguimento	Avaliar se a intervenção de exercício (COMB) teve efeitos duradouros na redução de quedas com lesões e fraturas em mulheres idosas	145	Treinamento combinado de resistência e salto-equilíbrio (COMB), 3x/semana por 12 meses	Grupo Controle (CON)	O grupo COMB teve uma taxa 62% menor de quedas com lesões e 74% menos fraturas em comparação com o grupo CON.
3	Park et al. (2012)	Effect of Jumping Exercise on Muscle Strength and Balance of Elderly People: a Randomized Controlled Trial	Ensaio Clínico Randomizado (RCT)	Investigar o efeito do exercício de salto na força muscular e equilíbrio de idosos	31	Programa de exercício terapêutico + exercício de salto (20 min/dia, 5 dias/semana, 4 semanas)	Programa de exercício terapêutico (30 min/dia, 5 dias/semana, 4 semanas)	Melhora significativa no equilíbrio dinâmico (BBS e TUG) e força muscular (quadril, joelho e tornozelo) no grupo de salto em comparação com o controle.
4	Allison et al. (2018)	High and odd impact exercise training improved physical function and fall risk factors in community-dwelling older men	Ensaio Clínico Randomizado (RCT)	Investigar a influência do exercício de alto impacto no equilíbrio, função muscular e morfologia em homens idosos	70	Programa de salto multidirecional (unilateral) de 6 meses (7 dias/semana)	Grupo Controle (sem intervenção)	Melhoras significativas no impulso de salto, força isométrica (leg-press, flexão plantar e dorsiflexão do tornozelo) e tempo de postura unilateral no grupo de treinamento.
5	Piirainen et al. (2014)	Effects of plyometric and pneumatic explosive strength training on neuromuscular function and dynamic balance control in 60–70 year old males	Ensaio Clínico Randomizado (RCT)	Comparar as adaptações neuromusculares ao treinamento de potência pliométrico (PLY) ou pneumático (PNE) de 12 semanas e seus efeitos no controle do equilíbrio dinâmico em homens de 60 a 70 anos	20	Treinamento Pliométrico (PLY) ou Treinamento Pneumático (PNE), 2-3x/semana, 12 semanas	Não há grupo controle (comparação entre os dois tipos de treinamento)	Ambos os grupos mostraram melhorias semelhantes no controle do equilíbrio dinâmico. O PLY mostrou maior aumento na altura ideal de salto em profundidade.
6	Gianoudis et al. (2014)	Effects of a Targeted Multimodal Exercise Program Incorporating High-Speed Power Training on Falls and Fracture Risk Factors in Older Adults: A Community-Based Randomized Controlled Trial	Ensaio Clínico Randomizado (RCT)	Avaliar a eficácia e viabilidade de um programa de exercício multimodal incorporando Treinamento de Resistência Progressiva de Alta Velocidade (HV-PRT) em adultos mais velhos	162	Programa Osteo-cise (HV-PRT, impacto com peso e atividades de equilíbrio/mobilidade), 3x/semana, 12 meses	Grupo Controle (cuidados habituais/autogerenciamento)	O programa Osteo-cise levou a ganhos modestos, mas significativos, na DMO, força muscular, potência muscular funcional e equilíbrio dinâmico. Não houve diferença na taxa de quedas.
7	Van Roie et al. (2020)	An age-adapted plyometric exercise program improves dynamic strength, jump performance and functional capacity in older men either similarly or more than traditional resistance training	Ensaio Clínico Randomizado (RCT)	Comparar os efeitos do exercício pliométrico (PLYO) na potência, produção de força, salto e desempenho funcional com o treinamento de resistência tradicional (RT) e caminhada (WALK) em homens idosos	40	Treinamento Pliométrico (PLYO) ou Treinamento de Resistência (RT), 3x/semana, 12 semanas	Grupo Caminhada (WALK)	PLYO melhorou mais no desempenho de salto, potência de salto e desempenho de subir escadas em comparação com WALK e/ou RT. RT e PLYO melhoraram a força de 1-RM de forma semelhante.
8	Zubac et al. (2019)	Plyometric exercise improves jumping performance and skeletal muscle contractile properties in seniors	Ensaio Clínico Randomizado (RCT)	Investigar os efeitos de uma sessão de treinamento pliométrico (PT) de 8 semanas na altura do salto com contramovimento (CMJ), velocidade de decolagem e parâmetros contráteis derivados da Tensiomiografia (TMG) em idosos	23	Treinamento Pliométrico (PLYO), 3x/semana, 8 semanas	Grupo Controle (CTRL) (exercício físico habitual, não estruturado)	Aumento significativo na altura do CMJ e velocidade de decolagem no PLYO. O PLYO melhorou a contratilidade muscular e a eficiência eletromecânica.
9	Ramírez-Campillo et al. (2016)	High-Speed Resistance Training in Older Women: The Role of Supervision	Ensaio Clínico Randomizado (RCT)	Comparar os efeitos de dois métodos de supervisão (alta vs. baixa) no Treinamento de Resistência de Alta Velocidade (HS-RT) na capacidade funcional, desempenho neuromuscular e qualidade de vida em mulheres idosas	73	Treinamento de Resistência de Alta Velocidade (HS-RT) com Alta Supervisão (HSG) ou Baixa Supervisão (LSG), 3x/semana, 12 semanas	Grupo Controle (CG) (sem intervenção)	O grupo de Alta Supervisão (HSG) mostrou maior melhora na força muscular, potência, desempenho funcional e qualidade de vida em comparação com LSG e CG.

## Sheet: Tabela 2 resultados
Tabela 2. Resultados e Desfechos
Artigo	Autor/Ano	Título	Desenho Metodológico	Tempo de Seguimento	N	Idade	Sexo	Intervenção (Tipo de Exercício, Volume, Frequência)	Desfechos Medidos	Tipo de Análise	Resultados de Cada Grupo	% Perdas (Dropouts)	Lesões/Desconfortos
1	Caserotti et al. (2008)	Changes in power and force generation during coupled eccentric–concentric versus concentric muscle contraction with training and aging	Ensaio Clínico Randomizado (RCT)	36 semanas	44	75 anos	Masculino	Treinamento multicomponente (aeróbico, força, equilíbrio, flexibilidade e coordenação); 1x/semana (frequência baixa); Volume não detalhado (treinamento de longo prazo)	Potência muscular (Pico e Média), Força Vertical, Altura do Salto (CMJ e SQJ), Desempenho Funcional (ex: 10-m walking test, PPT)	Não especificado (presume-se análise estatística padrão)	Grupo Treinamento (TG): Aumento de P_peak e JH. Grupo Controle (CG): Diminuição de P_peak e JH.	Não especificado	Não especificado
2	Karinkanta et al. (2015)	Combined resistance and balance-jumping exercise reduces older women’s injurious falls and fractures: 5-year follow-up study	Ensaio Clínico Randomizado (RCT)	5 anos	145	70–78 anos	Feminino	Treinamento combinado de resistência e salto-equilíbrio (COMB); 3x/semana; 12 meses (intervenção inicial)	Taxa de quedas com lesões e fraturas	Modelo de riscos proporcionais de Cox (para quedas) e Regressão de Poisson (para quedas e fraturas)	COMB: 62% menor taxa de quedas com lesões (HR 0.38) e 74% menos fraturas (RR 0.26) vs. CON.	2.7% (4/149) - 7 mulheres morreram e 1 mudou-se para cuidados institucionais durante o seguimento.	Não especificado
3	Park et al. (2012)	Effect of Jumping Exercise on Muscle Strength and Balance of Elderly People: a Randomized Controlled Trial	Ensaio Clínico Randomizado (RCT)	4 semanas	31	(idosos)	Misto (7M/9F no JEG, 7M/8F no CG)	Grupo Salto (JEG): Exercício terapêutico (30 min) + Salto (20 min); 5 dias/semana; 4 semanas. Grupo Controle (CG): Exercício terapêutico (30 min); 5 dias/semana; 4 semanas.	Oscilação postural (AP e ML), Equilíbrio Dinâmico (BBS e TUG), Força Muscular (quadril, joelho e tornozelo)	Teste t pareado (intra-grupo) e Teste t independente (inter-grupos)	JEG: Melhora significativa em todos os desfechos. Mudanças em equilíbrio dinâmico e força muscular foram significativamente maiores no JEG.	3.1% (1/32)	Não especificado
4	Allison et al. (2018)	High and odd impact exercise training improved physical function and fall risk factors in community-dwelling older men	Ensaio Clínico Randomizado (RCT)	6 meses	70	65-80 anos	Masculino	Programa de salto multidirecional (unilateral) de 6 meses; 7 dias/semana; 5 sets x 10 repetições de saltos em um pé	Impulso de salto, Força isométrica (leg-press, flexão plantar e dorsiflexão do tornozelo), Controle de equilíbrio (sway path, duração da postura em uma perna)	ANOVA de interação (Grupo x Tempo)	Melhoras significativas no impulso de salto (+12%), força isométrica (+4% a +20%) e tempo de postura unilateral no TG vs. CG.	Não especificado	Não especificado
5	Piirainen et al. (2014)	Effects of plyometric and pneumatic explosive strength training on neuromuscular function and dynamic balance control in 60–70 year old males	Ensaio Clínico Randomizado (RCT)	12 semanas	20	60–70 anos	Masculino	Treinamento Pliométrico (PLY) ou Treinamento Pneumático (PNE); 2-3x/semana; 12 semanas. 5 sets x 6 repetições.	Controle de equilíbrio dinâmico (deslocamento do COP), Torque de extensão do joelho e flexão plantar, Desempenho de salto em profundidade (Drop Jump)	ANOVA de medidas repetidas de duas vias	Ambos os grupos melhoraram o equilíbrio dinâmico. PLY mostrou maior aumento na altura ideal de salto em profundidade.	Não especificado	Não especificado
6	Gianoudis et al. (2014)	Effects of a Targeted Multimodal Exercise Program Incorporating High-Speed Power Training on Falls and Fracture Risk Factors in Older Adults: A Community-Based Randomized Controlled Trial	Ensaio Clínico Randomizado (RCT)	12 meses	162	67 ± 6 anos	Misto	Programa Osteo-cise (HV-PRT, impacto com peso e atividades de equilíbrio/mobilidade); 3x/semana; 12 meses.	DMO (colo do fêmur e coluna lombar), Força Muscular, Potência Muscular Funcional (Timed Stair Climb), Equilíbrio Dinâmico (Four Square Step Test, Sit-to-Stand), Taxa de Quedas	Não especificado (presume-se análise estatística padrão para RCT)	Ganhos modestos, mas significativos, na DMO (1.0% a 1.1%), força (10% a 13%), potência (5%) e equilíbrio (6% a 16%) no grupo Osteo-cise vs. Controle. Nenhuma diferença na taxa de quedas.	Não especificado	Não especificado
7	Van Roie et al. (2020)	An age-adapted plyometric exercise program improves dynamic strength, jump performance and functional capacity in older men either similarly or more than traditional resistance training	Ensaio Clínico Randomizado (RCT)	12 semanas	40	69.5 ± 3.9 anos	Masculino	Treinamento Pliométrico (PLYO) ou Treinamento de Resistência (RT); 3x/semana; 12 semanas.	1-RM (Leg Press), Contração Voluntária Máxima Isométrica (MVC), Taxa de Desenvolvimento de Força (RFD), Altura e Potência de Salto, Desempenho Funcional (subir escadas)	Não especificado (presume-se análise estatística padrão para RCT)	PLYO melhorou mais no desempenho de salto, potência de salto e desempenho de subir escadas. RT e PLYO melhoraram 1-RM (23-25%).	10% (4/40) (1 no RT por dor lombar, 3 no PLYO por lesões musculares/dor no joelho)	3 desistências no PLYO (2 distensões musculares, 1 dor no joelho)
8	Zubac et al. (2019)	Plyometric exercise improves jumping performance and skeletal muscle contractile properties in seniors	Ensaio Clínico Randomizado (RCT)	8 semanas	23	66.7 ± 5.2 anos	Não especificado (seniors)	Treinamento Pliométrico (PLYO); 3x/semana; 8 semanas.	Altura do Salto com Contramovimento (CMJ), Velocidade de Decolagem, Parâmetros Contráteis (Tensiomiografia - TMG), Marcadores Bioquímicos (LDH, CRP)	Não especificado (presume-se análise estatística padrão)	Aumento significativo na altura do CMJ (+14.2%) e velocidade de decolagem (+8.2%) no PLYO. Melhora na contratilidade muscular.	Não especificado no artigo (6 desistências por motivos não relacionados ao protocolo)	Não especificado
9	Ramírez-Campillo et al. (2016)	High-Speed Resistance Training in Older Women: The Role of Supervision	Ensaio Clínico Randomizado (RCT)	12 semanas	73	65.7 ± 3.7 a 67.5 ± 5.3 anos	Feminino	Treinamento de Resistência de Alta Velocidade (HS-RT) com Alta Supervisão (HSG) ou Baixa Supervisão (LSG); 3x/semana; 12 semanas.	Força Muscular (1-RM), Potência (Salto Vertical, Arremesso de Bola Medicinal), Desempenho Funcional (8-foot up-and-go, sit-to-stand), Qualidade de Vida	Não especificado (presume-se análise estatística padrão)	HSG mostrou maior melhora (ES = 0.36-1.26) em todos os desfechos em comparação com LSG e CG.	23.3% (HSG: 4/30; LSG: 12/28) (por "falta de tempo" ou "falta de motivação")	Não especificado

## Sheet: rob2
Nº Documento	Informações estudo		Randomização(S/N) Justifique		Desvio da Intervenção- viés de performance (S/N) Justifique			Dados Faltantes			Viés da mensuração do desfecho (S/N) Justifique			Seleção dos resultados(S/N) Justifique			Observações
	Autor/ano	Titulo	Alocação secreta?	Assimetria na linha de base?	Cegamento	Co-intervenção	Analise foi apropriada?	Qual % total de dados Faltantes?	% de perdas foi balanceda entre os grupos?	Análise de sensbilidade, imputação dos dados?	Grupos foram avaliados da mesma forma ?	Os avalidores estavam cegos?	O desfecho é influenciado pelo cegamento?	Há número de registrado?	Houve seleção dos desfechos conforme resultado?	O desfecho principal são iguais no registro e no paper?
1	Caserotti 2008	Changes in power and force generation during coupled eccentric–concentric versus concentric muscle contraction with training and aging	Não descrito – randomização relatada, mas não há detalhes sobre ocultação da sequência	Não – grupos semelhantes em idade e características	Não – avaliadores não cegos, testes funcionais aplicados pelo mesmo pesquisador	Não – não houve intervenções adicionais	Não. O artigo não especifica o tipo de análise. A análise de estudos de intervenção que não mencionam ITT e não detalham o tratamento de perdas é frequentemente considerada uma análise Por Protocolo (PP), pois assume que apenas os dados completos foram utilizados.	~11% – perdas relatadas	Sim – perdas semelhantes entre grupos	Não – não houve imputação	Sim – mesmos testes aplicados em todos	Não – avaliadores não cegados	Sim (risco) – desfechos funcionais podem ser influenciados	Não – não há registro	Não – todos desfechos relatados	Não – não há registro para comparar	Estudo pequeno, multicomponente, sem cegamento claro
2	Karinkanta 2015	Combined resistance and balance-jumping exercise reduces older women’s injurious falls and fractures: 5-year follow-up study	Sim – randomização centralizada	Não – grupos comparáveis	Parcial – avaliadores cegos para desfechos via registros hospitalares	Não – não houve intervenções adicionais	Sim –the analysis was based on both intention-to-treat principle and register-based confirmation of the injuries." (Linha 482)	3% – perdas mínimas	Sim – perdas equilibradas	Não – não houve imputação	Sim – todos avaliados via registros	Sim – avaliadores cegos	Não – desfecho objetivo (quedas/fraturas) não depende de cegamento	Sim – registro ANZCTR	Não – todos desfechos relatados	Sim – consistência entre paper e registro	Forte validade externa, 5 anos follow-up
3	Park 2012	Effect of Jumping Exercise on Muscle Strength and Balance of Elderly People: a Randomized Controlled Trial	Não descrito – randomização relatada, mas sem detalhes	Não – grupos semelhantes	Não descrito – cegamento não informado	Não – não houve intervenções adicionais	Não. Pois não há menção explícita a ITT, PP ou MPP. A ausência de menção ao tratamento de perdas sugere uma análise Por Protocolo (PP	3% – 1 perda	Sim – perdas equilibradas	Não – não houve imputação	Sim – mesmos testes aplicados	Não – avaliadores não cegados	Sim (risco) – desfechos funcionais dependem de avaliador	Não – não há registro	Não – todos desfechos relatados	Não – não há registro	Estudo pequeno, mas bem controlado
4	Allison 2018	High and odd impact exercise training improved physical function and fall risk factors in community-dwelling older men	radomização. Randomização da Perna para o Grupo de Treinamento (TG): O programa de exercícios de alto impacto foi realizado com uma perna aleatoriamente alocada dos participantes no Grupo de Treinamento (TG). Randomização da Perna para o Grupo de Controle (CG): As medições neuromusculares e de equilíbrio foram realizadas unilateralmente em uma perna aleatoriamente escolhida nos participantes do G…	Não – grupos semelhantes	Não descrito – cegamento não informado	Não – não houve intervenções adicionais	Não, pois não há menção explícita a ITT, PP ou MPP. A ausência de menção ao tratamento de perdas sugere uma análise Por Protocolo (PP).	20% – perdas relevantes	Não – perdas maiores em um grupo	Não – não houve imputação	Sim – mesmos testes aplicados	Não – avaliadores não cegados	Sim (risco) – desfechos funcionais dependem de avaliador	Não – não há registro	Sim – foco em resultados positivos	Não – não há registro	Quase-experimental, perdas não balanceadas
5	Piirainen 2014	Effects of plyometric and pneumatic explosive strength training on neuromuscular function and dynamic balance control in 60–70 year old males	Não descrito – randomização relatada, mas sem detalhes	Não – grupos semelhantes	Não descrito – cegamento não informado	Não – não houve intervenções adicionais	Não. Por Protocolo (PP). O artigo afirma que os sujeitos "volunteered and completed this 12-week study" (Linha 139), indicando que a análise foi realizada apenas com os participantes que finalizaram o protocolo.	0% – sem perdas	–	Não – não houve imputação	Sim – mesmos testes aplicados	Não – avaliadores não cegados	Sim (risco) – desfechos funcionais dependem de avaliador	Não – não há registro	Não – todos desfechos relatados	Não – não há registro	Estudo fisiológico, foco em EMG e reflexos
6	Gianoudis 2014	Effects of a Targeted Multimodal Exercise Program Incorporating High‐Speed Power Training on Falls and Fracture Risk Factors in Older Adults: A Community‐Based Randomized Controlled Trial	Sim – randomização centralizada	Não – grupos semelhantes	Parcial – DXA cego, testes funcionais não	Não – não houve intervenções adicionais	Sim – análise por intenção de tratar. All data were analyzed on an intention-to-treat basis; ie, data from all participants were included in the analyses regardless of compliance. Participants who discontinued exercise and other dropouts were measured at follow-up if they agreed to return for testing. No data was imputed for the few participants with missing data." (Linhas 334-339	7% – perdas moderadas	Sim – perdas equilibradas	Não – não houve imputação	Sim – mesmos testes aplicados	Parcial – cegamento apenas em alguns desfechos	Não – desfechos objetivos não dependem de cegamento	Sim – registro ANZCTR	Não – todos desfechos relatados	Sim – consistência com registro	Forte validade, mas sem efeito em quedas
7	Van Roie 2020	An age-adapted plyometric exercise program improves dynamic strength, jump performance and functional capacity in older men either similarly or more than traditional resistance training	Sim – randomização em blocos	Não – grupos semelhantes	Não descrito – cegamento não informado	Não – não houve intervenções adicionais	Nâo. MPP. Quatro participantes abandonaram o estudo, mas a análise estatística foi realizada com os 40 sujeitos que iniciaram o estudo, com a ressalva de que dois foram xcluídos antes da linha de base ("In RT, two subjects were not able to perform baseline measurements... so they were excluded from the study (Fig 1)."). A análise foi realizada com os participantes que completaram a linha de base,…	10% – 3 perdas por lesão	Sim – perdas semelhantes	Não – não houve imputação	Sim – mesmos testes aplicados	Não – avaliadores não cegos	Sim (risco) – desfechos funcionais podem ser influenciados	Sim – registro OSF	Não – todos desfechos relatados	Sim – consistência com registro	Boa descrição de segurança, 3 dropouts por lesão
8	Zubac 2019	Plyometric exercise improves jumping performance and skeletal muscle contractile properties in seniors	Sim – randomização relatada	Não – grupos semelhantes	Não descrito – cegamento não informado	Não – não houve intervenções adicionais	Não. MPP. Six participants dropped from the study due to reasons unrelated to the experimental protocols; this included one participant who was afraid of injury, and another participant who was excluded due to methodological issues (loss of data)." (Linhas 173-177). A análise foi realizada com os participantes que completaram a linha de base e não foram excluídos por problemas metodológicos, o qu…	26% – perdas relevantes	Não – perdas maiores em um grupo	Não – não houve imputação	Sim – mesmos testes aplicados	Não – avaliadores não cegos	Sim (risco) – desfechos funcionais dependem de avaliador	Não – não há registro	Não – todos desfechos relatados	Não – não há registro	Incluiu marcadores inflamatórios (segurança)
9	Ramírez-Campillo 2016	High-Speed Resistance Training in Older Women: The Role of Supervision	Sim – randomização eletrônica	Não – grupos semelhantes	Parcial – avaliadores cegos em alguns testes	Não – não houve intervenções adicionais	Não. há menção explícita a ITT, PP ou MPP. A ausência de menção ao tratamento de perdas sugere uma análise Por Protocolo (PP)	45% – perdas altas	Não – perdas maiores no grupo baixa supervisão	Não – não houve imputação	Sim – mesmos testes aplicados	Parcial – cegamento em alguns testes	Sim (risco) – desfechos funcionais dependem de avaliador	Sim – registro informado	Não – todos desfechos relatados	Não – divergência não avaliada	Perdas maiores no grupo baixa supervisão
